# Supplementary material for: Fluorescent 7-azaindoleN-linked 1,2,3-triazole: synthesis and study of antimicrobial, molecular docking, ADME and DFT properties
Source: Royal Society of Chemistry journal article supplement (doi:10.1039/d3nj00223c), 2023-01-01
Supplement: d3nj00223c1.pdf [file d3nj00223c1.pdf]

## Fluorescent 7-Azaindole *N*-linked 1,2,3-triazole: Synthesis and Study of Antimicrobial, Molecular Docking, ADME and DFT Properties

Kanika Sharma,<sup>a</sup> Ram Kumar Tittal,<sup>a,\*</sup> Kashmiri Lal,<sup>b</sup> Ramling S. Mathpati,<sup>a</sup> Ghule Vikas D.<sup>a</sup>

<sup>a</sup>Department of Chemistry, National Institute of Technology, Kurukshetra, Haryana 136119, India.

E-mail: [rkittaliitd@mail.nitkr.ac.in](mailto:rkittaliitd@mail.nitkr.ac.in)

<sup>b</sup>Department of Chemistry, GJUS&T, Hisar, Haryana 125001, India.

### Table of Content:

| S. No. | Contents                                                                                                                                                                  | Page No.     |
|--------|---------------------------------------------------------------------------------------------------------------------------------------------------------------------------|--------------|
| 1      | Table of Contents                                                                                                                                                         | S-1          |
| 2      | X-Ray Crystallography Experimental Section                                                                                                                                | S-2          |
| 3      | <b>Table SI-1.</b> Crystal data and structure refinement parameters for <b>4f</b> .                                                                                       | S-2          |
| 4      | <b>Figure SI-1.</b> Unit cell showing two molecular units in the asymmetric unit of compound <b>4f</b> .                                                                  | S-3          |
| 5      | <b>Figure SI-2.</b> Absorbance spectrum of 7-AI ( <b>1</b> ), 7-AI-linked alkyne ( <b>2</b> ), and 1,2,3-triazoles ( <b>4a-i</b> )                                        | S-3          |
| 6      | <b>Table SI-2.</b> Docking results of 1,2,3- triazole hybrids <b>4a-q</b> , docked in the active sites of DNA 14 $\alpha$ -demethylase lanosterol enzyme (PDB ID 1EA1).   | S-4          |
| 7      | <b>Figure SI-3.</b> 2D and 3D interacting mode of <b>4a-4q</b> docked in the active site of lanosterol 14- $\alpha$ -demethylase.                                         | S-5 to S-10  |
| 8      | <b>Table SI-3.</b> Physicochemical data for Drug Likeness based on the Lipinski rule (SAR)                                                                                | S-11         |
| 9      | <b>Table SI-4</b> Bioactivity score by Molinspiration Cheminformatics software                                                                                            | S-11         |
| 10     | Computational study (general)                                                                                                                                             | S-12         |
| 11     | <b>Table SI-5.</b> Calculated FMOs, energy gap, chemical potential, chemical hardness, and electrophilicity index (eV), B3LYP/6-311G(d,p).                                | S-12         |
| 12     | <b>Figure SI-4.</b> Highest occupied and lowest unoccupied molecular orbitals (HOMO and LUMO) distribution at the ground state of molecules <b>2</b> , and <b>4a-4q</b> . | S-13 to S-17 |
| 13     | General procedure for the synthesis of 7-azaindole <i>N</i> -linked alkyne ( <b>2</b> )                                                                                   | S-17         |
| 14     | General procedure for the synthesis of 7-azaindole <i>N</i> -linked aryl 1,2,3-triazoles ( <b>4a-4q</b> ).                                                                | S-18         |
| 15     | Spectroscopic data of compound ( <b>2</b> )                                                                                                                               | S-18         |
| 16     | Spectroscopic data of compound ( <b>4a-4q</b> )                                                                                                                           | S-18 to S-24 |
| 17     | References                                                                                                                                                                | S-24         |
| 18     | Physical spectra of compounds <b>2</b> and <b>4a-4q</b> ( <sup>1</sup> H-NMR, <sup>13</sup> C-NMR and HRMS)                                                               | S-25 to S-59 |

### X-Ray Crystallography Experimental Section:

A block-shaped clear whiteish yellow color single crystals were carefully picked under a polarizing microscope and pasted to a very fine glass fiber with the help of cyanoacrylate (superglue) adhesive. The single-crystal X-ray diffraction data were collected with Bruker APEX-II CCD diffractometer with monochromatic Mo  $K\alpha$  radiation ( $\lambda = 0.71073 \text{ \AA}$ ) at 296 (2) K by using  $\omega$  and  $\phi$  scan. The X-ray generator was operated at 50 kV and 20 mA. The data were reduced by using APEX3, the SAINTPLUS<sup>5</sup> program was used for diffraction profiles integration, and absorption correction (multiscan) was done by the SADABS program.<sup>1</sup> The structure was solved and refined by the full-matrix least square method on  $F^2$  using the SHELXL 2018/3 program,<sup>2</sup> present in the WinGx package of programs (version 1.63.04a).<sup>3</sup> All the hydrogen positions were initially located in the different Fourier maps, and for the final refinement, the hydrogen atoms were placed in geometrically ideal positions and refined in the riding mode. The final refinement comprised the atomic positions of all the atoms, isotropic thermal parameters for all the hydrogen atoms, and anisotropic thermal parameters for all the non-hydrogen atoms. Please refer following **Table SI-1** for a detailed explanation of the crystal

**Table SI-1.** Crystal data and structure refinement parameters for **4f**.

| Compound                                | 4f                                                             |
|-----------------------------------------|----------------------------------------------------------------|
| Empirical formula                       | C <sub>17</sub> H <sub>14</sub> N <sub>5</sub> Br <sub>1</sub> |
| Formula weight                          | 368.240                                                        |
| Crystal system                          | Triclinic                                                      |
| Space group                             | <i>P</i> -1 (2)                                                |
| <i>a</i> (Å)                            | 5.5829 (2)                                                     |
| <i>b</i> (Å)                            | 8.3646 (4)                                                     |
| <i>c</i> (Å)                            | 16.4765 (8)                                                    |
| $\alpha$ (°)                            | 80.4360 (10)                                                   |
| $\beta$ (°)                             | 87.5270 (10)                                                   |
| $\gamma$ (°)                            | 85.7270 (10)                                                   |
| <i>V</i> (Å <sup>3</sup> )              | 756.26 (6)                                                     |
| <i>Z</i>                                | 2                                                              |
| <i>D</i> (calc/gcm <sup>-3</sup> )      | 1.617                                                          |
| $\mu$ (mm <sup>-1</sup> )               | 2.725                                                          |
| $\lambda$ (Mo $K\alpha$ /Å)             | 0.71073                                                        |
| <i>F</i> <sub>000</sub>                 | 372.00                                                         |
| $\theta_{\min}$ and $\theta_{\max}$     | 2.585° and 28.317°                                             |
| Measured reflections                    | 12363                                                          |
| Independent reflections                 | 3740                                                           |
| Reflections with $I > 2\sigma(I)$       | 3469                                                           |
| R <sub>int</sub>                        | 0.0343                                                         |
| R[F <sup>2</sup> > 2σ(F <sup>2</sup> )] | 0.0263                                                         |
| wR(F <sup>2</sup> )                     | 0.0655                                                         |

$$R_1 = \frac{\sum ||F_0| - |F_c||}{\sum |F_0|}; wR2 = \left\{ \frac{\sum [w(F_0^2 - F_c^2)^2]}{\sum [w(F_0^2)^2]} \right\}^{1/2}.$$

$$w = 1/[\sigma^2(F_0^2) + (aP)^2 + bP], P = [\max.(F_0^2, 0) + 2(F_c^2)]/3.$$

structure solution and final refinements for the structures. The crystallographic data for compound **4f** can be found in CCDC No: **2192737** free of charge from The Cambridge Crystallographic Data Centre (CCDC) via [www.ccdc.cam.ac.uk/data\\_request/cif](http://www.ccdc.cam.ac.uk/data_request/cif).

The X-ray single-crystal structure investigation revealed that compound **4f** was shaped in a triclinic crystal system. Compound **4f** crystallizes in triclinic cells with space group *P-1*. The resultant structure of compound **4f** contains two molecular units in the asymmetric unit and is represented in **Figure SI-1**. In the crystal structure, one can find two molecular structures anti-parallel to each other similar to the mirror image with respect to the 1,2,3-triazole unit in the middle. No hydrogen bonding interactions were found in the present compound.

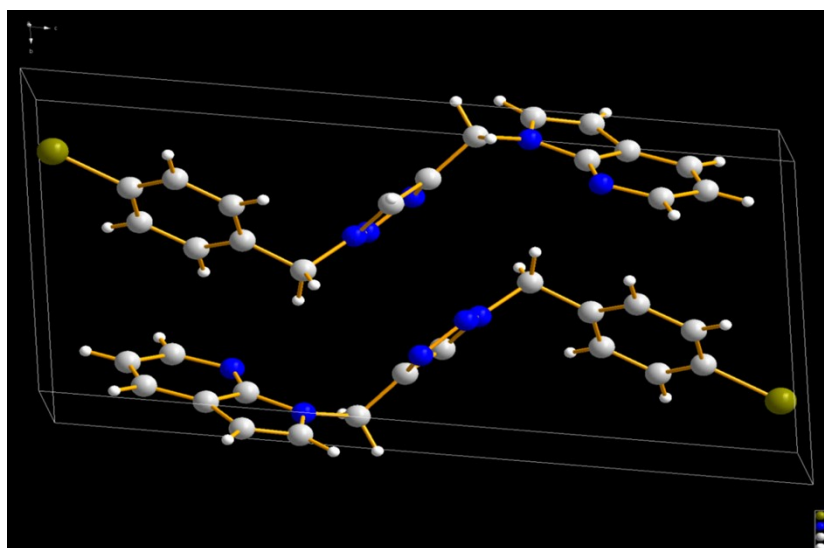

**Figure SI-1.** Unit cell showing two molecular units in the asymmetric unit of compound **4f**.

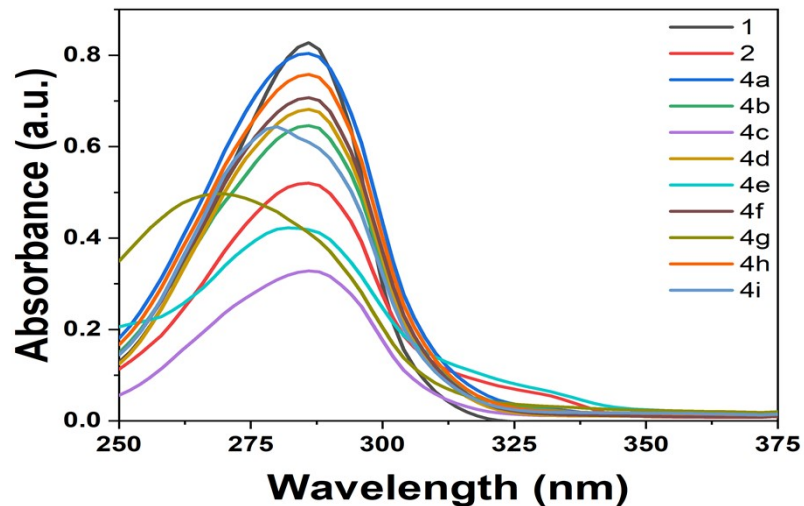

**Figure SI-2.** Absorbance spectrum of 7-AI (**1**), 7-AI-linked alkyne (**2**), and 1,2,3-triazoles (**4a-i**)

**Table SI-2.** Docking results of synthesized 1,2,3- triazole hybrids **4a-q**, docked in the active sites of DNA 14 $\alpha$ -demethylase lanosterol enzyme (PDB ID 1EA1).

| S. No. | Comp.     | n, R                 | H-bond interactions with bond length                                  | Other Interactions                                                            | B.E. (kcal mol <sup>-1</sup> ) |
|--------|-----------|----------------------|-----------------------------------------------------------------------|-------------------------------------------------------------------------------|--------------------------------|
| 1      | <b>2</b>  | -                    | THR260(2.93)                                                          | CYS394, PRO320, ALA400                                                        | <b>-6.11</b>                   |
| 2      | <b>4a</b> | 1, H                 | THR260(2.74), SER261(2.48), CYS394(3.57)                              | GLY257 GLY396, ALA400, PHE399, PRO320, ALA104, LEU105, LEU152, ALA256, LEU321 | -8.75                          |
| 3      | <b>4b</b> | 1, 4-F               | GLN72(3.09), ARG96(2.84), ARG96(2.23)                                 | PRO386, PHE387, LEU321, MET79, TYR76, PHE78, LEU324, CYS394                   | -9.02                          |
| 4      | <b>4c</b> | 1, 2-Cl              | CYS394(3.72)                                                          | THR260, LEU321, TYR76, SER261, PRO320, LEU321                                 | -8.65                          |
| 5      | <b>4d</b> | 1, 3-Cl              | CYS394(3.78), VAL395(2.948), GLY396(2.945)                            | ARG96, LEU105, ALA256, ALA256, LEU100, MET99, PHE83                           | -8.81                          |
| 6      | <b>4e</b> | 1,4-Cl               | ARG96(2.69)                                                           | ALA256, ALA256, PHE78, LEU321, ILE323, LEU100                                 | -9.05                          |
| 7      | <b>4f</b> | 1, 4-Br              | ARG96(2.46)                                                           | TYR76, MET79, CYS394, TYR76, LEU321, PHE78                                    | -8.76                          |
| 8      | <b>4g</b> | 1, 4-NO <sub>2</sub> | THR260(2.87), ARG326(1.85), ARG326 (2.43), CYS394(3.48), CYS394(3.63) | PRO320, ALA400, LEU321, LEU32                                                 | -8.74                          |
| 9      | <b>4h</b> | 1, 4-Me              | ARG96(2.77)                                                           | TYR76, CYS394, LEU321, PHE78, MET79, LEU324                                   | <b>-9.28</b>                   |
| 10     | <b>4i</b> | 1,4-OMe              | ARG96(2.25)                                                           | ILE323, LEU321, TYR76, PHE78, PHE387, GLY388, CYS394, MET79, LEU324           | -8.38                          |
| 11     | <b>4j</b> | 0, H                 | THR260(2.72), CYS394(3.76)                                            | GLY396, ALA400,PHE399, PHE387, PRO320,LEU152, LEU321                          | -9.09                          |
| 12     | <b>4k</b> | 0, 4-F               | THR260(2.96), CYS394(3.60)                                            | ALA400, PHE387, PHE399, PRO320, LEU152, ALA256, LEU321                        | <b>-9.21</b>                   |
| 13     | <b>4l</b> | 0, 2-Cl              | ARG96(2.55), ARG96(2.39)                                              | TYR76, PHE255, CYS394, LEU321, MET79, LEU324                                  | -8.55                          |
| 14     | <b>4m</b> | 0, 3-Cl              | THR260(2.84), CYS394(3.65)                                            | GLY257, ALA400, PHE387, PHE399,LEU100, ALA256, LEU105,PRO320, LEU152, LEU321  | -9.17                          |
| 15     | <b>4n</b> | 0, 4-Cl              | THR260(2.77), CYS394(3.66)                                            | ALA400, PHE387, ALA104, LEU152, PRO320, ALA256, LEU321                        | -8.79                          |
| 16     | <b>4o</b> | 0, 4-Br              | ARG96(2.36), ARG96(1.91)                                              | LEU321, CYS394, TYR76, VAL434, PHE78, HIS259, LEU100, ALA256                  | -8.74                          |
| 17     | <b>4p</b> | 0, 4-NO <sub>2</sub> | ARG96 (1.92), HIS259 (2.79)                                           | VAL434, GLN72, LEU321, TYR76, PHE387, GLY388, LEU324, CYS394                  | -8.51                          |
| 18     | <b>4q</b> | 0,4-OMe              | ARG95(2.85), HIS392(2.27), CYS3949(3.69)                              | ARG391, THR260, PHE387, VAL395, PRO320, LEU321, ALA400, ARG96                 | -8.44                          |

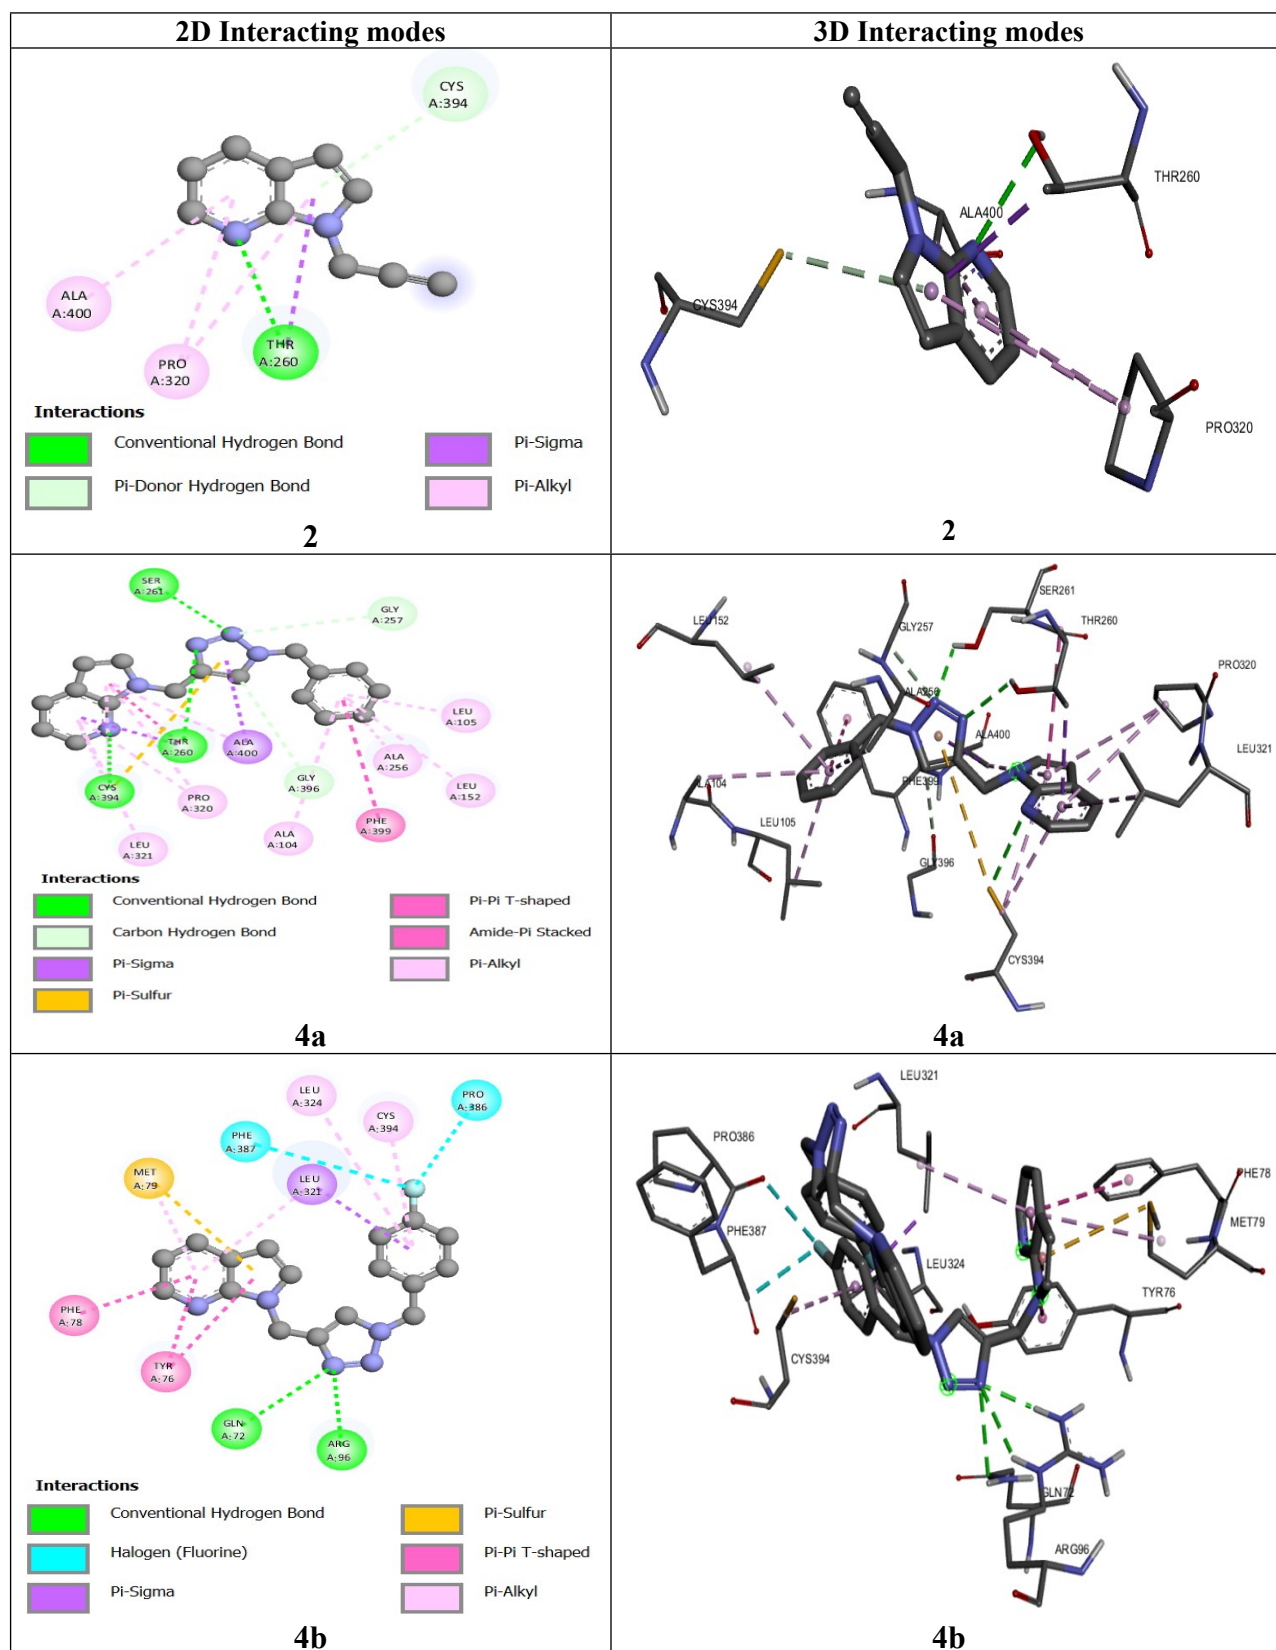

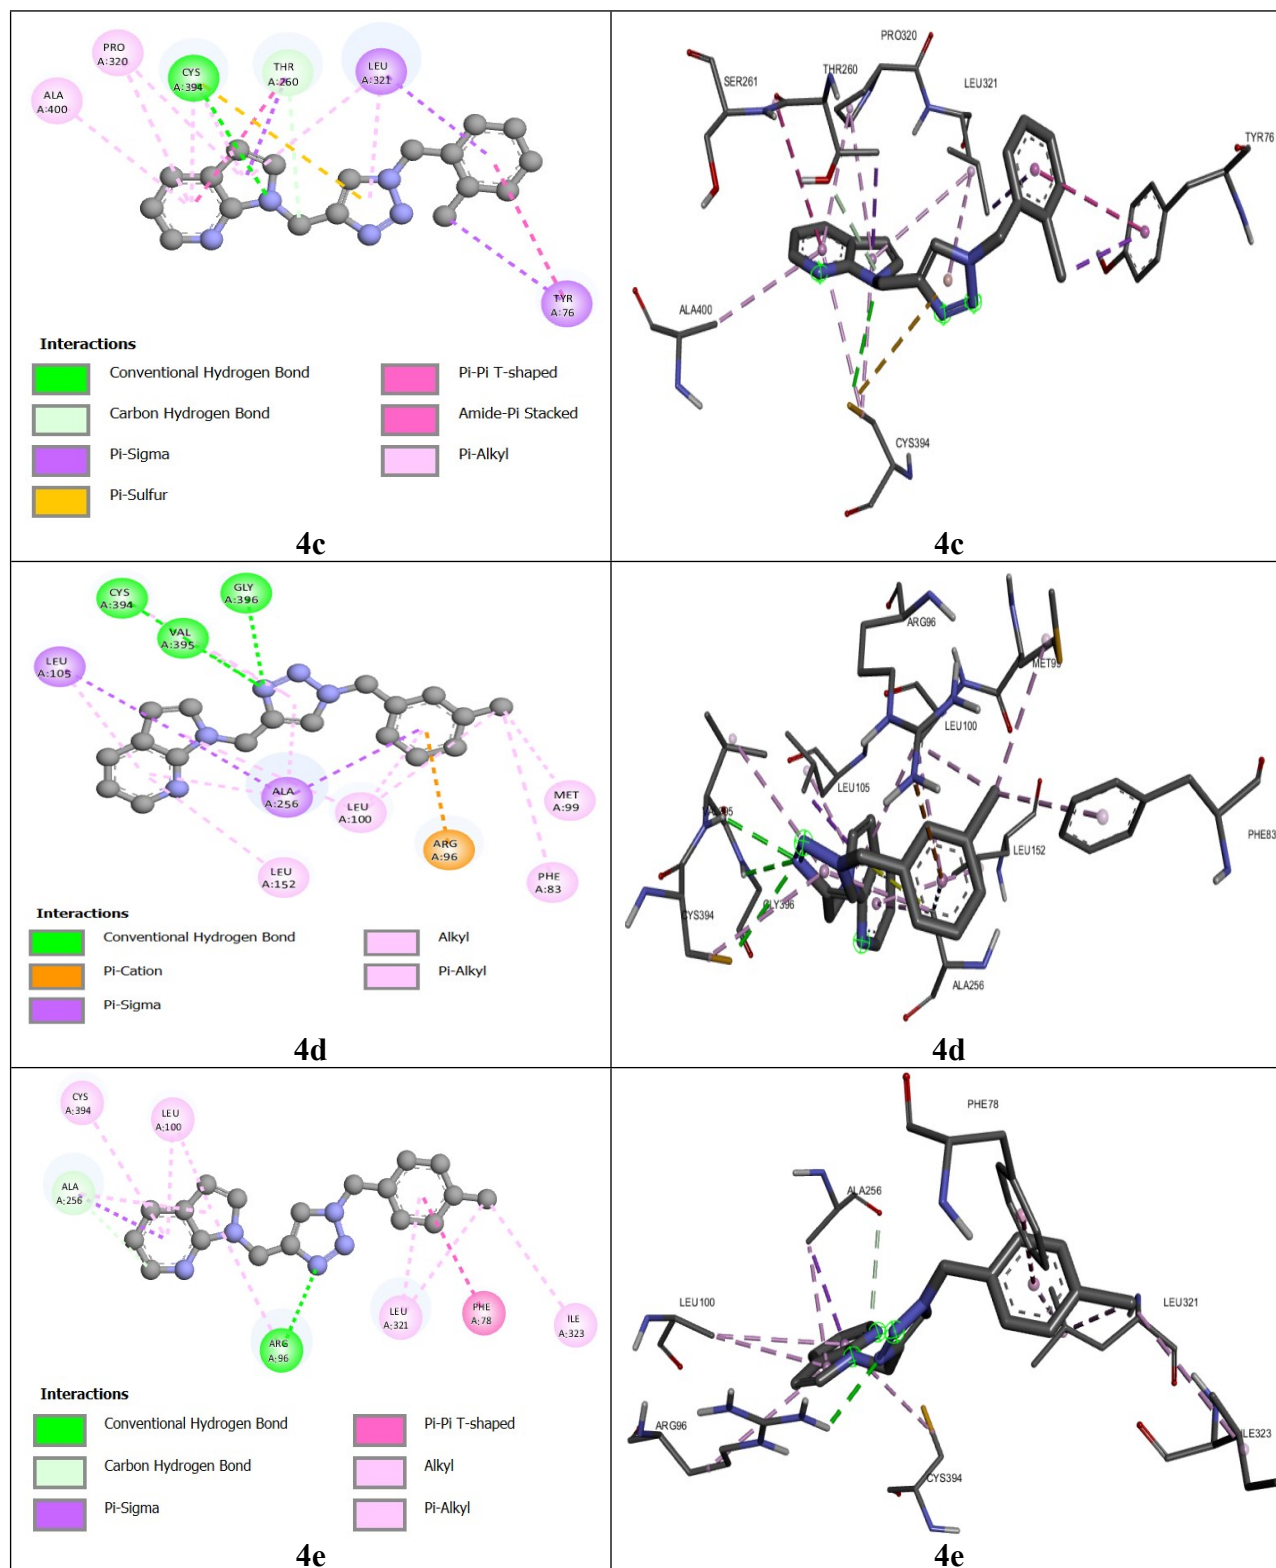

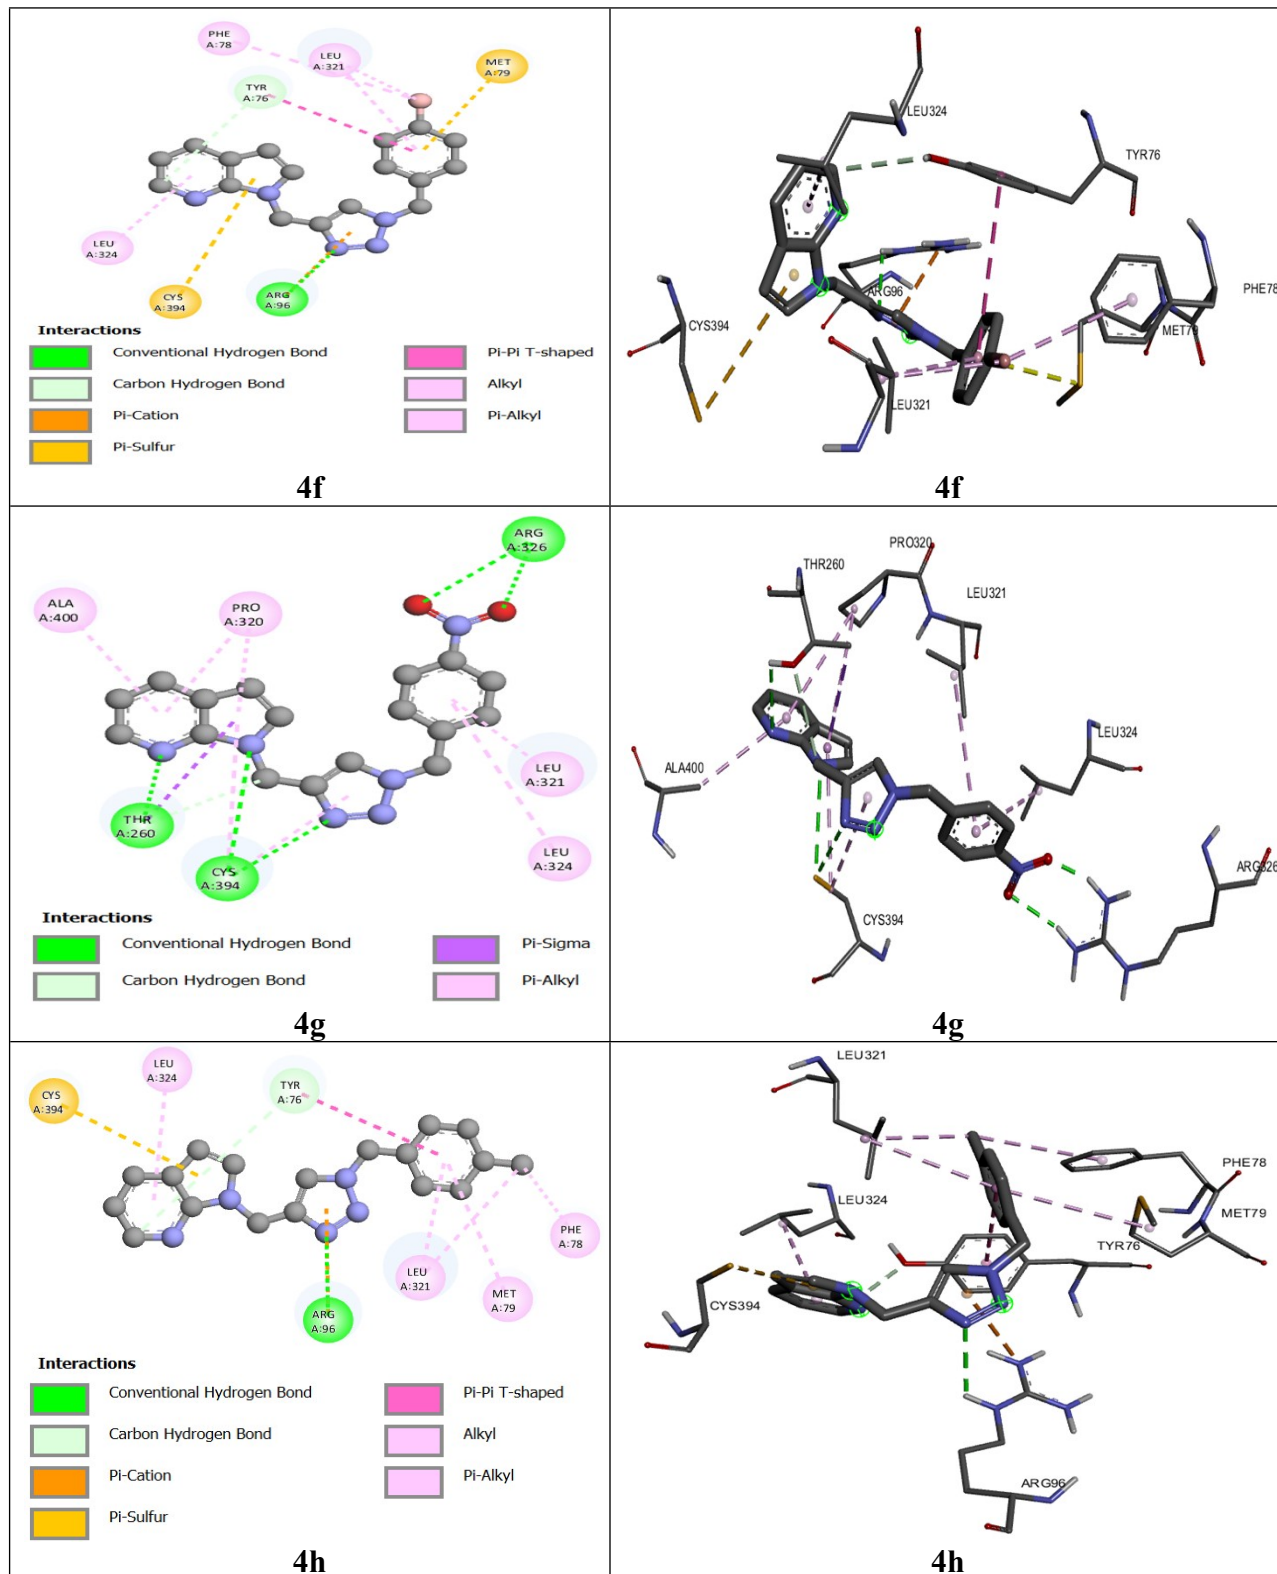

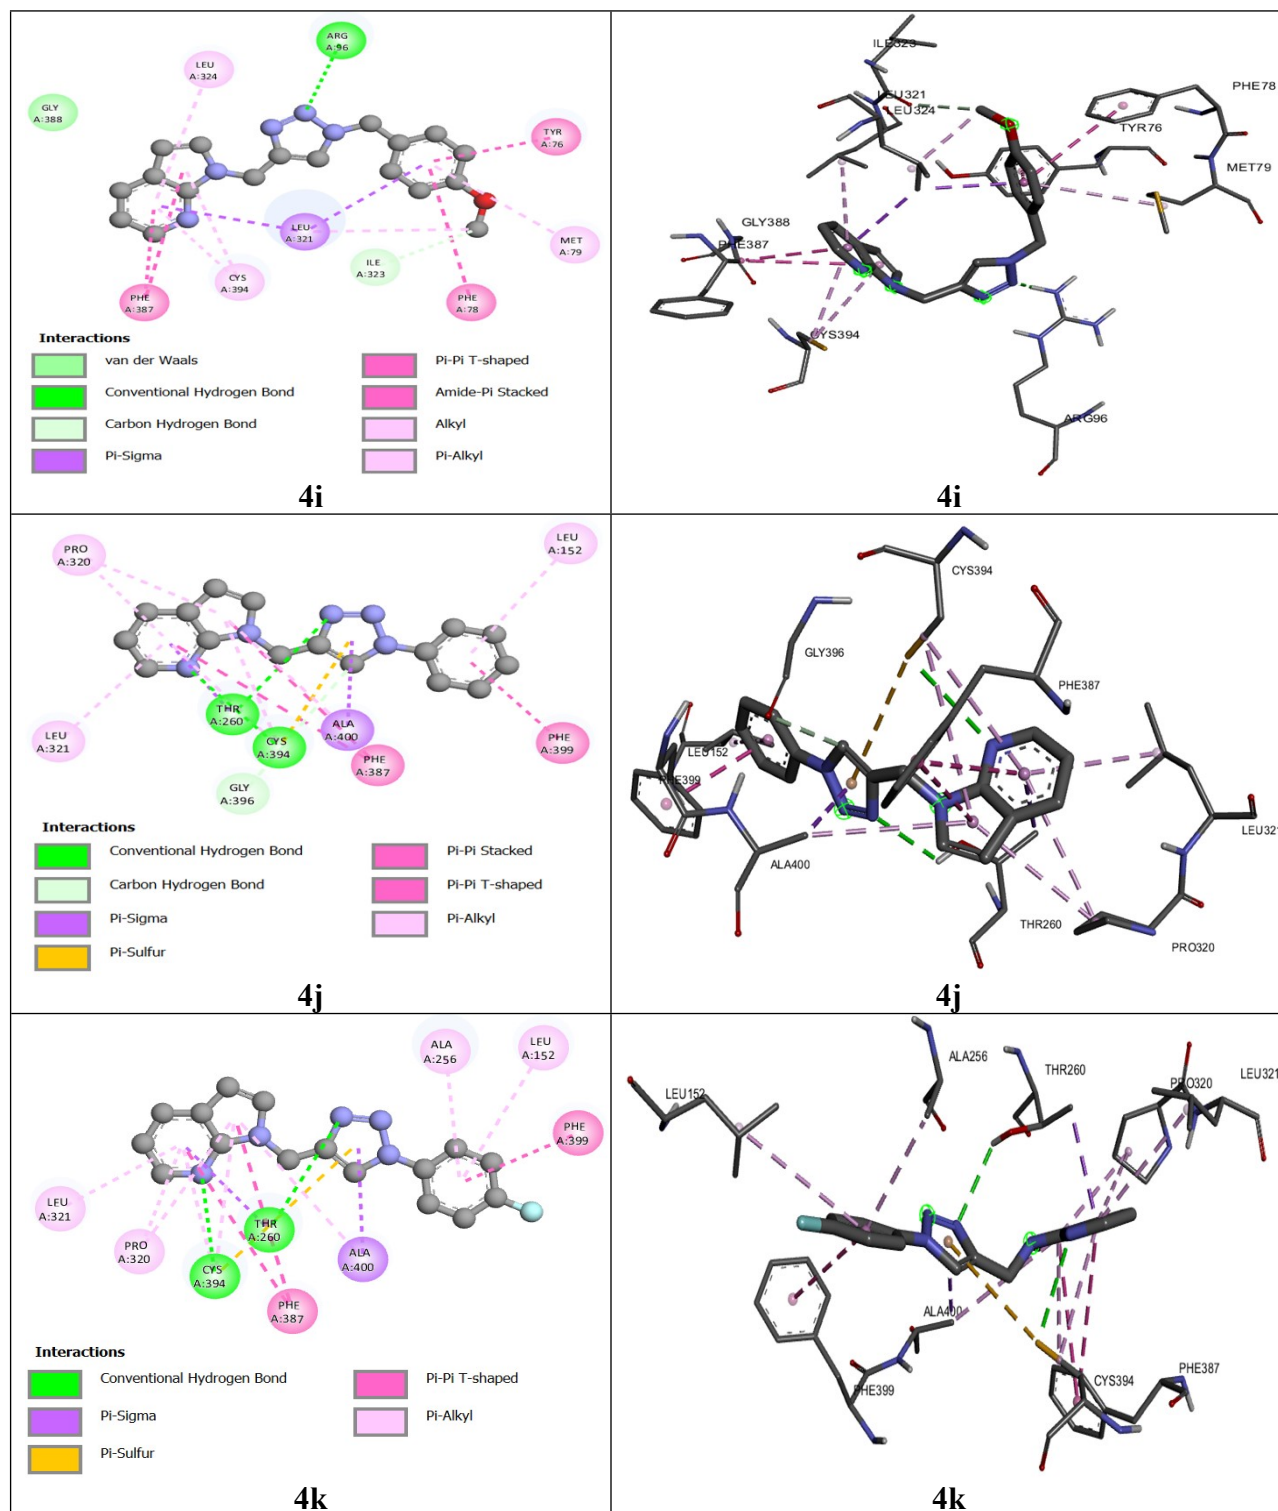



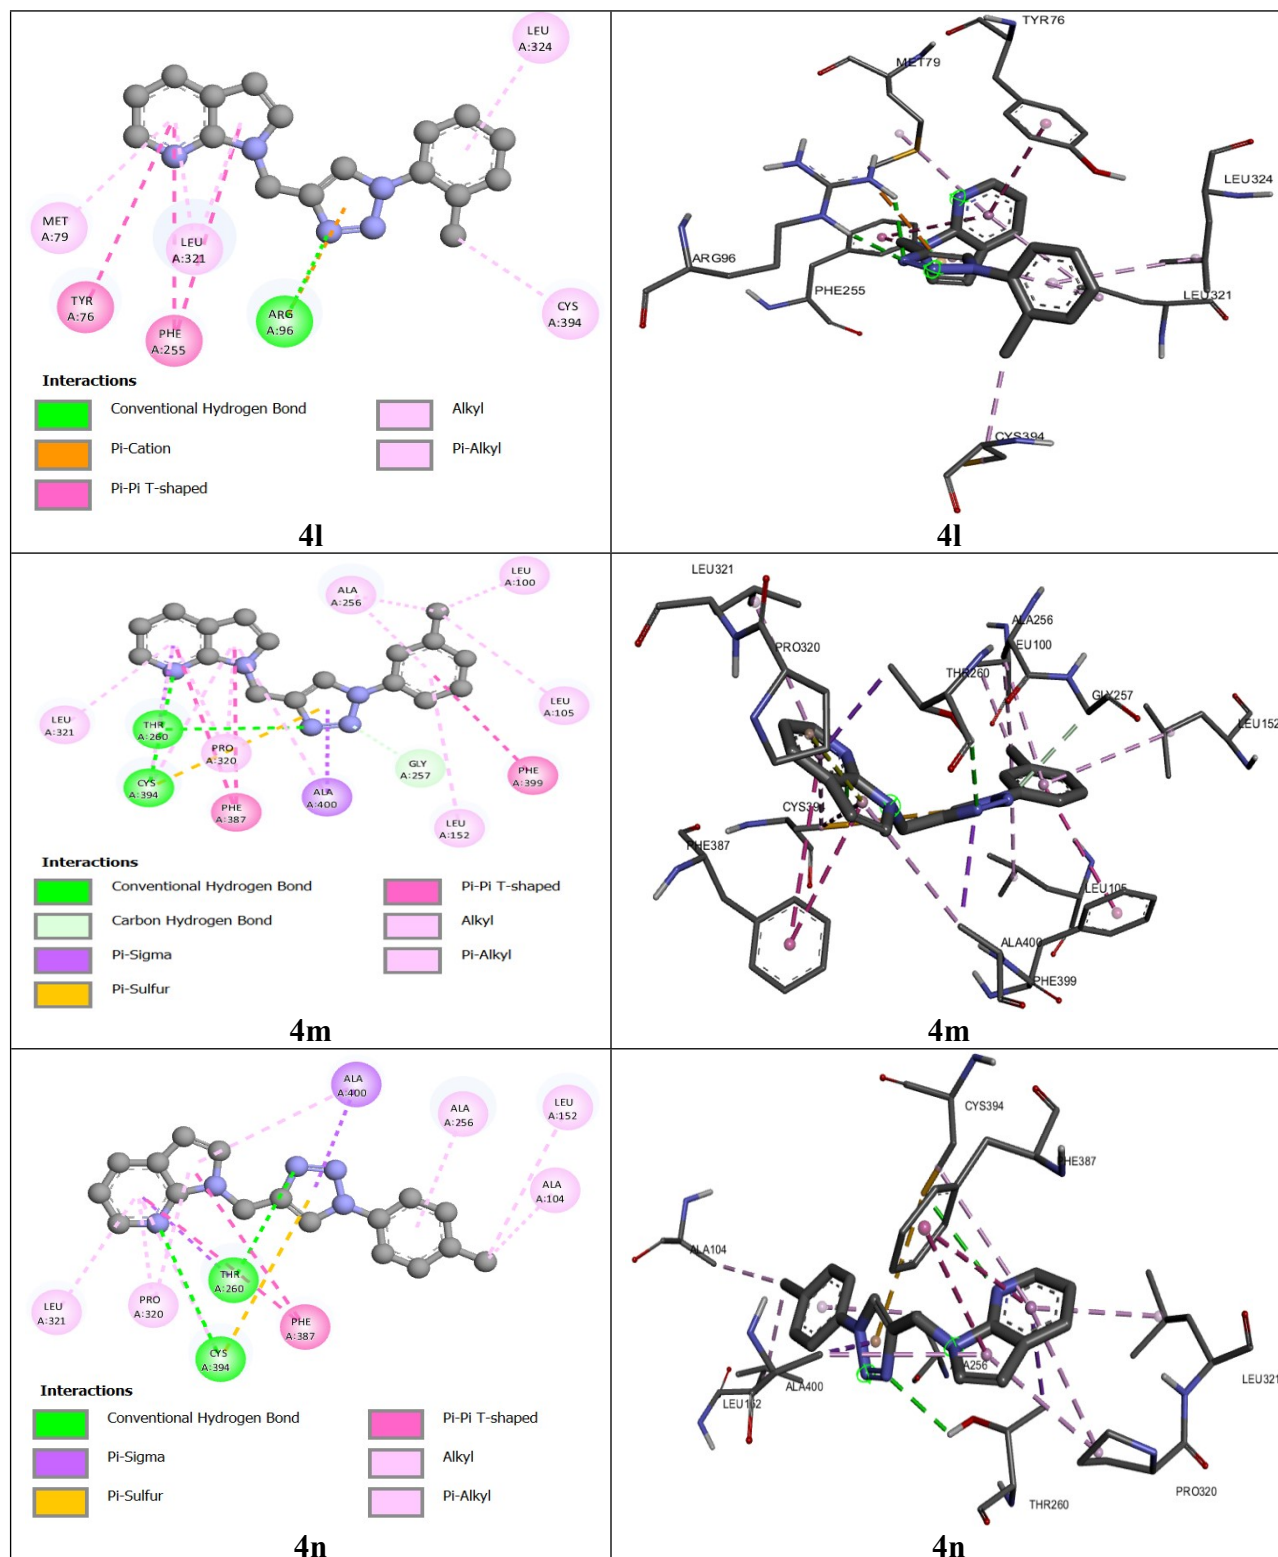

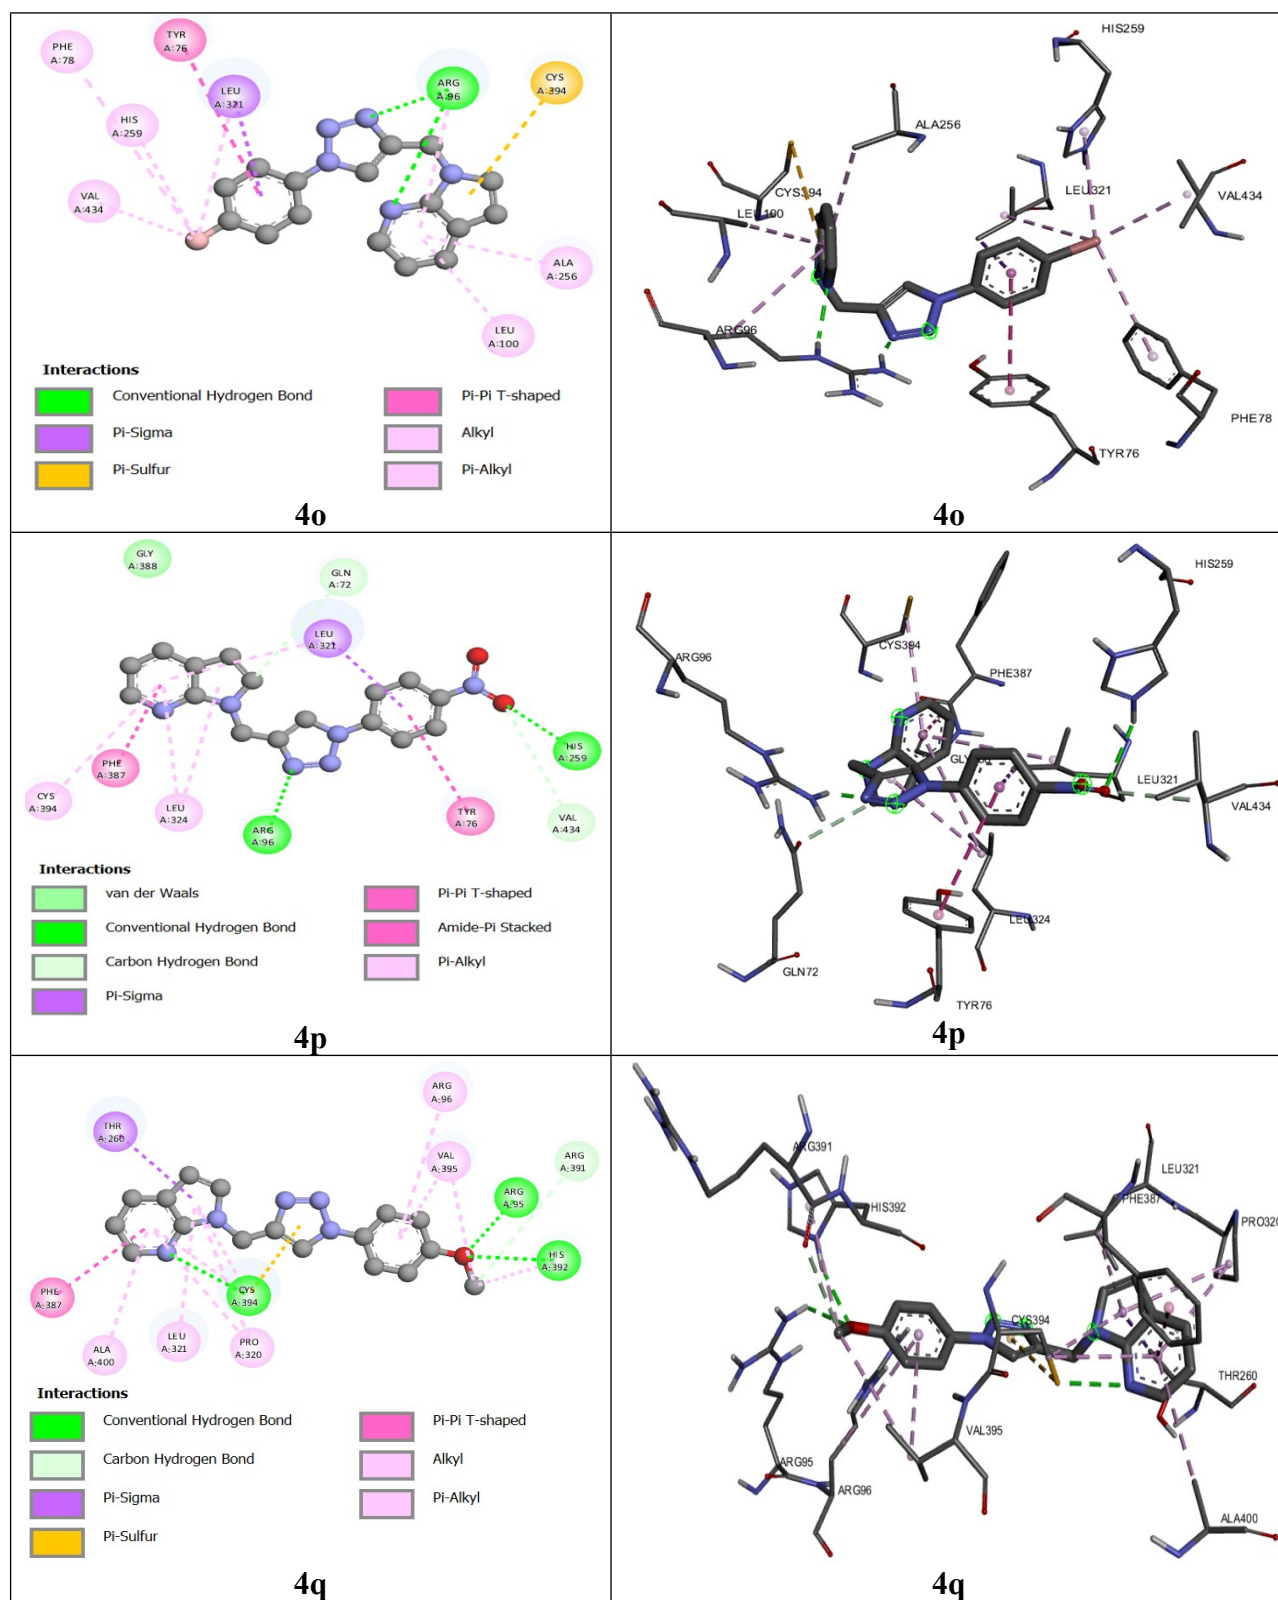

**Figure SI-3.** 2D and 3D interacting mode of **4a-4q** docked in the active site of lanosterol 14- $\alpha$ -demethylase.

**Table SI-3.** Physicochemical data for Drug Likeness based on the Lipinski rule (SAR)

| Comp.<br>Rule | %Abs <sup>a</sup> | miLogP <sup>b</sup><br><5 | TPSA <sup>c</sup> | N <sub>atoms</sub> <sup>d</sup> | MW <sup>e</sup><br><500 | N <sub>ON</sub> <sup>f</sup><br><10 | N <sub>OHNH</sub> <sup>g</sup><br><5 | N <sub>viol</sub> <sup>h</sup> | N <sub>rotb</sub> <sup>i</sup><br><10 | Vol <sup>j</sup> |
|---------------|-------------------|---------------------------|-------------------|---------------------------------|-------------------------|-------------------------------------|--------------------------------------|--------------------------------|---------------------------------------|------------------|
| 2             | 102.84            | 1.49                      | 17.83             | 12                              | 156.19                  | 2                                   | 0                                    | 0                              | 1                                     | 148.31           |
| 4a            | 92.25             | 2.67                      | 48.54             | 22                              | 289.34                  | 5                                   | 0                                    | 0                              | 4                                     | 262.72           |
| 4b            | 92.25             | 2.84                      | 48.54             | 23                              | 307.33                  | 5                                   | 0                                    | 0                              | 4                                     | 267.65           |
| 4c            | 92.25             | 3.03                      | 48.54             | 23                              | 323.79                  | 5                                   | 0                                    | 0                              | 4                                     | 276.26           |
| 4d            | 92.25             | 3.33                      | 48.54             | 23                              | 323.79                  | 5                                   | 0                                    | 0                              | 4                                     | 276.26           |
| 4e            | 92.25             | 3.35                      | 48.54             | 23                              | 323.79                  | 5                                   | 0                                    | 0                              | 4                                     | 276.26           |
| 4f            | 92.25             | 3.48                      | 48.54             | 23                              | 368.24                  | 5                                   | 0                                    | 0                              | 4                                     | 280.61           |
| 4g            | 76.44             | 2.68                      | 94.37             | 25                              | 334.34                  | 8                                   | 0                                    | 0                              | 5                                     | 286.06           |
| 4h            | 92.25             | 3.12                      | 48.54             | 23                              | 303.37                  | 5                                   | 0                                    | 0                              | 4                                     | 279.28           |
| 4i            | 89.06             | 2.73                      | 57.78             | 24                              | 319.37                  | 6                                   | 0                                    | 0                              | 5                                     | 288.27           |
| 4j            | 92.25             | 2.35                      | 48.54             | 21                              | 275.31                  | 5                                   | 0                                    | 0                              | 3                                     | 245.92           |
| 4k            | 92.25             | 2.52                      | 48.54             | 22                              | 293.31                  | 5                                   | 0                                    | 0                              | 3                                     | 250.85           |
| 4l            | 92.25             | 3.19                      | 48.54             | 22                              | 309.76                  | 5                                   | 0                                    | 0                              | 3                                     | 259.45           |
| 4m            | 92.25             | 3.22                      | 48.54             | 22                              | 309.76                  | 5                                   | 0                                    | 0                              | 3                                     | 259.45           |
| 4n            | 92.25             | 3.03                      | 48.54             | 22                              | 309.76                  | 5                                   | 0                                    | 0                              | 3                                     | 259.45           |
| 4o            | 92.25             | 3.16                      | 48.54             | 22                              | 354.21                  | 5                                   | 0                                    | 0                              | 3                                     | 263.81           |
| 4p            | 76.44             | 2.31                      | 94.37             | 24                              | 320.31                  | 8                                   | 0                                    | 0                              | 4                                     | 269.25           |
| 4q            | 89.06             | 2.41                      | 57.78             | 23                              | 305.34                  | 6                                   | 0                                    | 0                              | 4                                     | 271.46           |

<sup>a</sup>Absorption; <sup>b</sup>octanol-water partition coefficient, calculated by methodology developed by Molinspiration; <sup>c</sup>polar surface area; <sup>d</sup>number of non-hydrogen atoms; <sup>e</sup>molecular weight; <sup>f</sup>number of hydrogen-bond acceptor (O and N atoms); <sup>g</sup>number of hydrogen-bond donors (OH and NH atoms); <sup>h</sup>number of “Rule of five” violations; <sup>i</sup>number of rotatable bonds; <sup>j</sup>molecular volume

**Table SI-4** Bioactivity score by Molinspiration Cheminformatics software

| S. No. | Compound | GPCR <sup>a</sup> | ICM <sup>b</sup> | KI <sup>c</sup> | NRL <sup>d</sup> | PI <sup>e</sup> | EI <sup>f</sup> |
|--------|----------|-------------------|------------------|-----------------|------------------|-----------------|-----------------|
| 1.     | 2        | -0.21             | -0.17            | -0.39           | -0.88            | -0.94           | 0.11            |
| 2.     | 4a       | 0.25              | 0.06             | 0.39            | -0.18            | -0.06           | 0.25            |
| 3.     | 4b       | 0.26              | 0.04             | 0.42            | -0.13            | -0.06           | 0.22            |
| 4.     | 4c       | 0.22              | 0.04             | 0.33            | -0.18            | -0.15           | 0.14            |
| 5.     | 4d       | 0.25              | 0.06             | 0.35            | -0.18            | -0.08           | 0.20            |
| 6.     | 4e       | 0.24              | 0.05             | 0.37            | -0.17            | -0.08           | 0.20            |
| 7.     | 4f       | 0.14              | -0.02            | 0.34            | -0.27            | -0.16           | 0.16            |
| 8.     | 4g       | 0.07              | -0.01            | 0.21            | -0.24            | -0.15           | 0.10            |
| 9.     | 4h       | 0.20              | -0.02            | 0.34            | -0.18            | -0.10           | 0.17            |
| 10.    | 4i       | 0.19              | -0.03            | 0.33            | -0.15            | -0.07           | 0.17            |
| 11.    | 4j       | 0.29              | 0.12             | 0.41            | -0.14            | -0.13           | 0.28            |
| 12.    | 4k       | 0.31              | 0.09             | 0.45            | -0.08            | -0.12           | 0.25            |
| 13.    | 4l       | 0.43              | 0.18             | 0.49            | -0.14            | -0.17           | 0.19            |
| 14.    | 4m       | 0.28              | 0.08             | 0.36            | -0.13            | -0.19           | 0.20            |
| 15.    | 4n       | 0.30              | 0.10             | 0.39            | -0.13            | -0.14           | 0.23            |
| 16.    | 4o       | 0.19              | 0.02             | 0.36            | -0.23            | -0.22           | 0.18            |
| 17.    | 4p       | 0.13              | 0.03             | 0.24            | -0.19            | -0.20           | 0.12            |
| 18.    | 4q       | 0.25              | 0.01             | 0.36            | -0.10            | -0.13           | 0.20            |

<sup>a</sup>G-protein coupled receptor; <sup>b</sup>ion channel modulator; <sup>c</sup>kinase inhibitor; <sup>d</sup>nuclear receptor ligand; <sup>e</sup>protease inhibitor; <sup>f</sup>enzyme inhibitor

### Computational Study:

The frontier orbitals of the chemical compounds are very significant parameters in drug design and in recognizing their reactivity.<sup>4,6</sup> A molecule with a higher value of highest occupied molecular orbital (HOMO) can give electrons to suitable acceptor molecules with low energy and empty molecular orbitals. Predicted frontier orbital energies, chemical potential ( $\mu$ ), chemical hardness ( $\eta$ ), and electrophilicity index ( $\omega$ ) are presented in the **Table SI-3**. The values of  $\mu$ ,  $\eta$ , and  $\omega$  were obtained by using the highest occupied molecular orbital (HOMO) and the lowest unoccupied molecular orbital (LUMO) energies according to Koopmans' theorem and Parr approximation,<sup>7</sup> expressed as:

$$(1)$$

$$(2)$$

$$(3)$$

**Table SI-5.** Calculated FMOs, energy gap, chemical potential, chemical hardness, and electrophilicity index in eV at the B3LYP/6-311G(d,p) level of theory.

| S. No. | Compound  | $E_{\text{HOMO}}$ | $E_{\text{LUMO}}$ | $E_{\text{LUMO-HOMO}}$ | $\mu$ | $\eta$ | Softness | $\omega$ |
|--------|-----------|-------------------|-------------------|------------------------|-------|--------|----------|----------|
|        |           |                   |                   |                        | (eV)  |        |          |          |
| 1.     | <b>2</b>  | -6.08             | -0.98             | 5.11                   | -3.53 | 2.55   | 0.3921   | 2.44     |
| 2.     | <b>4a</b> | -5.98             | -0.95             | 5.03                   | -3.46 | 2.51   | 0.3984   | 2.39     |
| 3.     | <b>4b</b> | -6.03             | -1.00             | 5.03                   | -3.51 | 2.51   | 0.3984   | 2.45     |
| 4.     | <b>4c</b> | -5.96             | -1.15             | 4.81                   | -3.56 | 2.40   | 0.4167   | 2.63     |
| 5.     | <b>4d</b> | -6.04             | -1.06             | 4.98                   | -3.55 | 2.49   | 0.4016   | 2.53     |
| 6.     | <b>4e</b> | -6.05             | -1.08             | 4.97                   | -3.56 | 2.48   | 0.4032   | 2.56     |
| 7.     | <b>4f</b> | -6.24             | -0.80             | 5.44                   | -3.52 | 2.72   | 0.3676   | 2.28     |
| 8.     | <b>4g</b> | -6.15             | -2.80             | 3.35                   | -4.47 | 1.67   | 0.5988   | 5.97     |
| 9.     | <b>4h</b> | -6.29             | -1.12             | 5.17                   | -3.71 | 2.59   | 0.3861   | 2.66     |
| 10.    | <b>4i</b> | -5.95             | -0.91             | 5.03                   | -3.43 | 2.52   | 0.3968   | 2.34     |
| 11.    | <b>4j</b> | -6.04             | -1.31             | 4.73                   | -3.67 | 2.36   | 0.4237   | 2.85     |
| 12.    | <b>4k</b> | -6.10             | -1.34             | 4.76                   | -3.72 | 2.38   | 0.4201   | 2.90     |
| 13.    | <b>4l</b> | -5.99             | -1.42             | 4.57                   | -3.71 | 2.29   | 0.4366   | 3.00     |
| 14.    | <b>4m</b> | -6.11             | -1.59             | 4.52                   | -3.85 | 2.26   | 0.4424   | 3.28     |
| 15.    | <b>4n</b> | -6.12             | -1.57             | 4.55                   | -3.84 | 2.28   | 0.4385   | 3.25     |
| 16.    | <b>4o</b> | -6.12             | -1.58             | 4.54                   | -3.85 | 2.27   | 0.4405   | 3.26     |
| 17.    | <b>4p</b> | -6.26             | -2.91             | 3.35                   | -4.58 | 1.67   | 0.5988   | 6.27     |
| 18.    | <b>4q</b> | -5.98             | -1.02             | 4.96                   | -3.50 | 2.48   | 0.4032   | 2.47     |

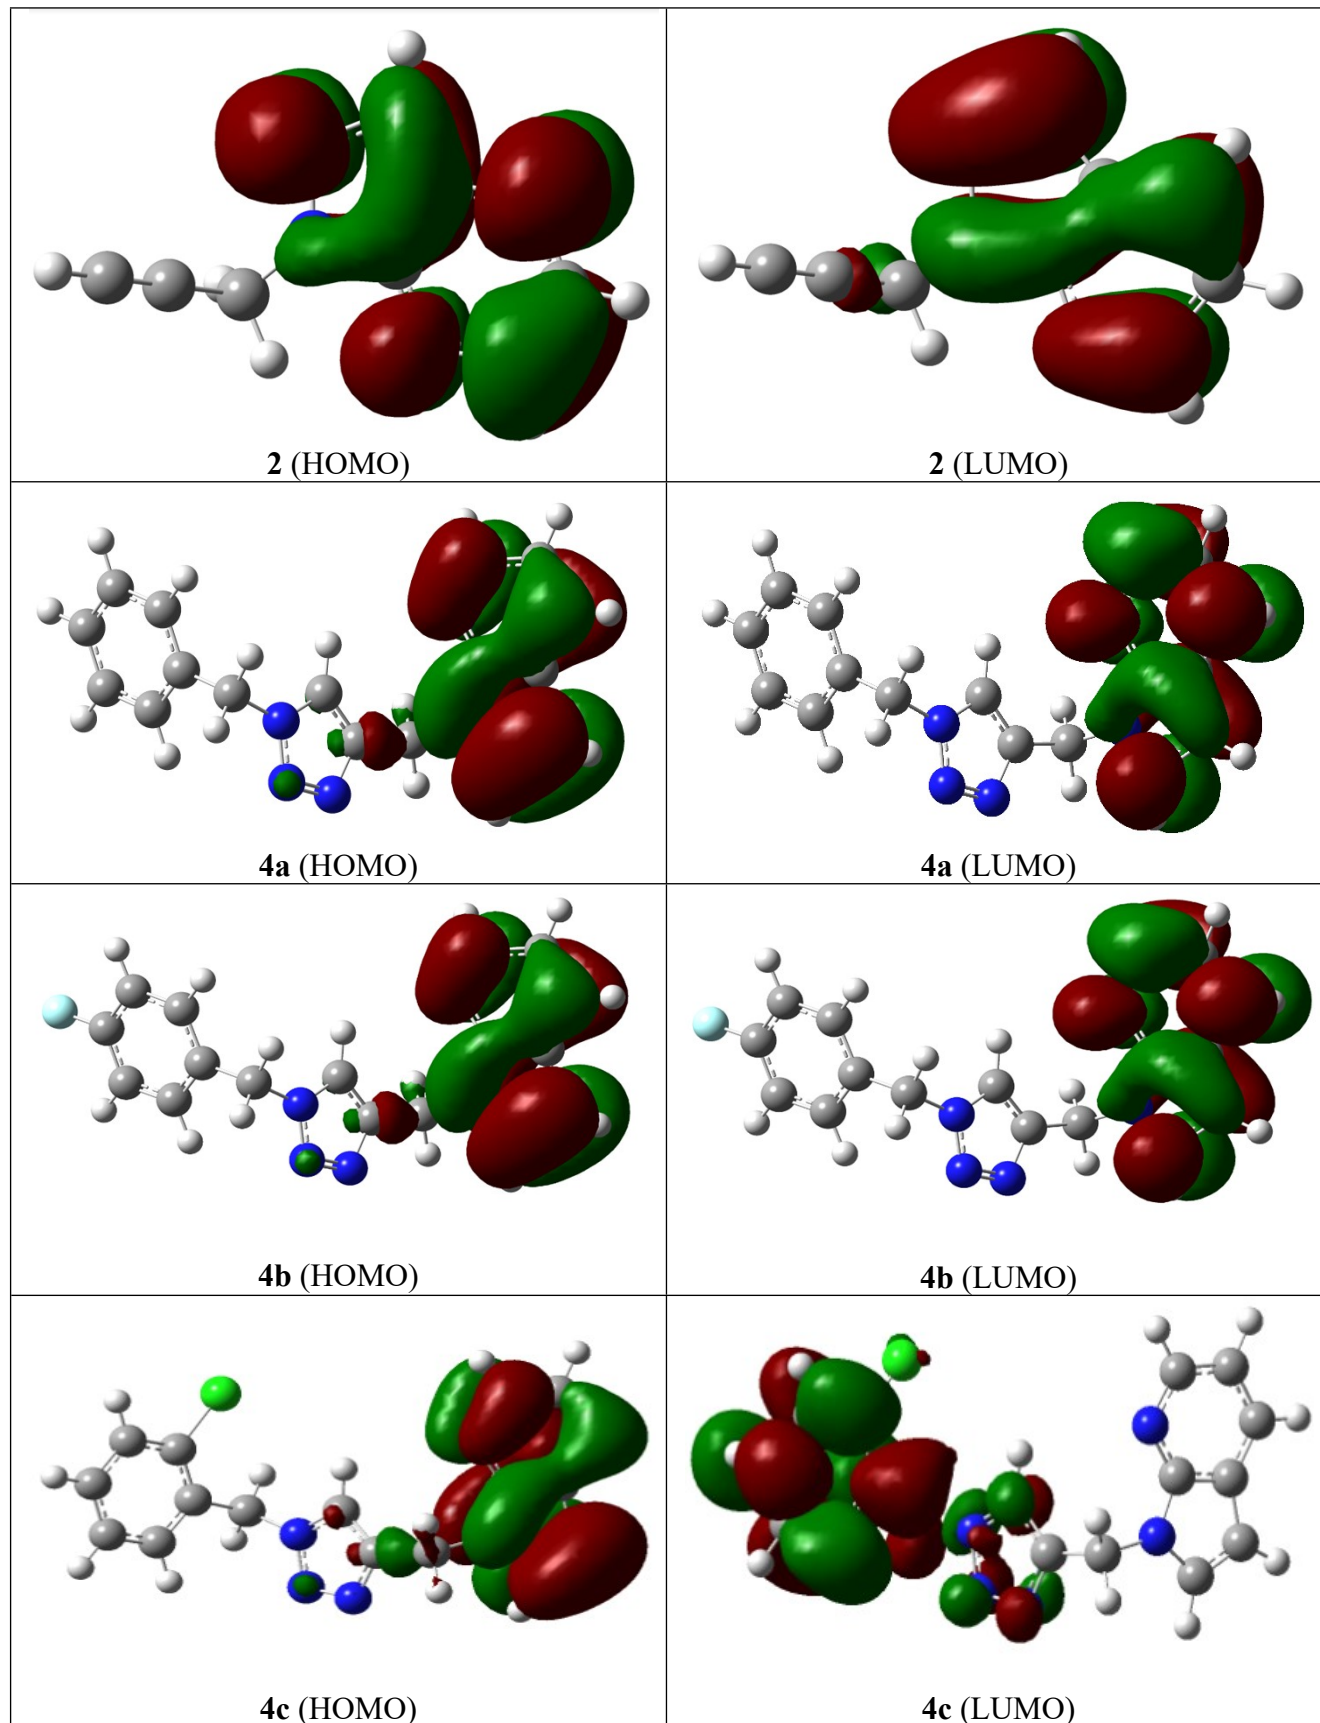

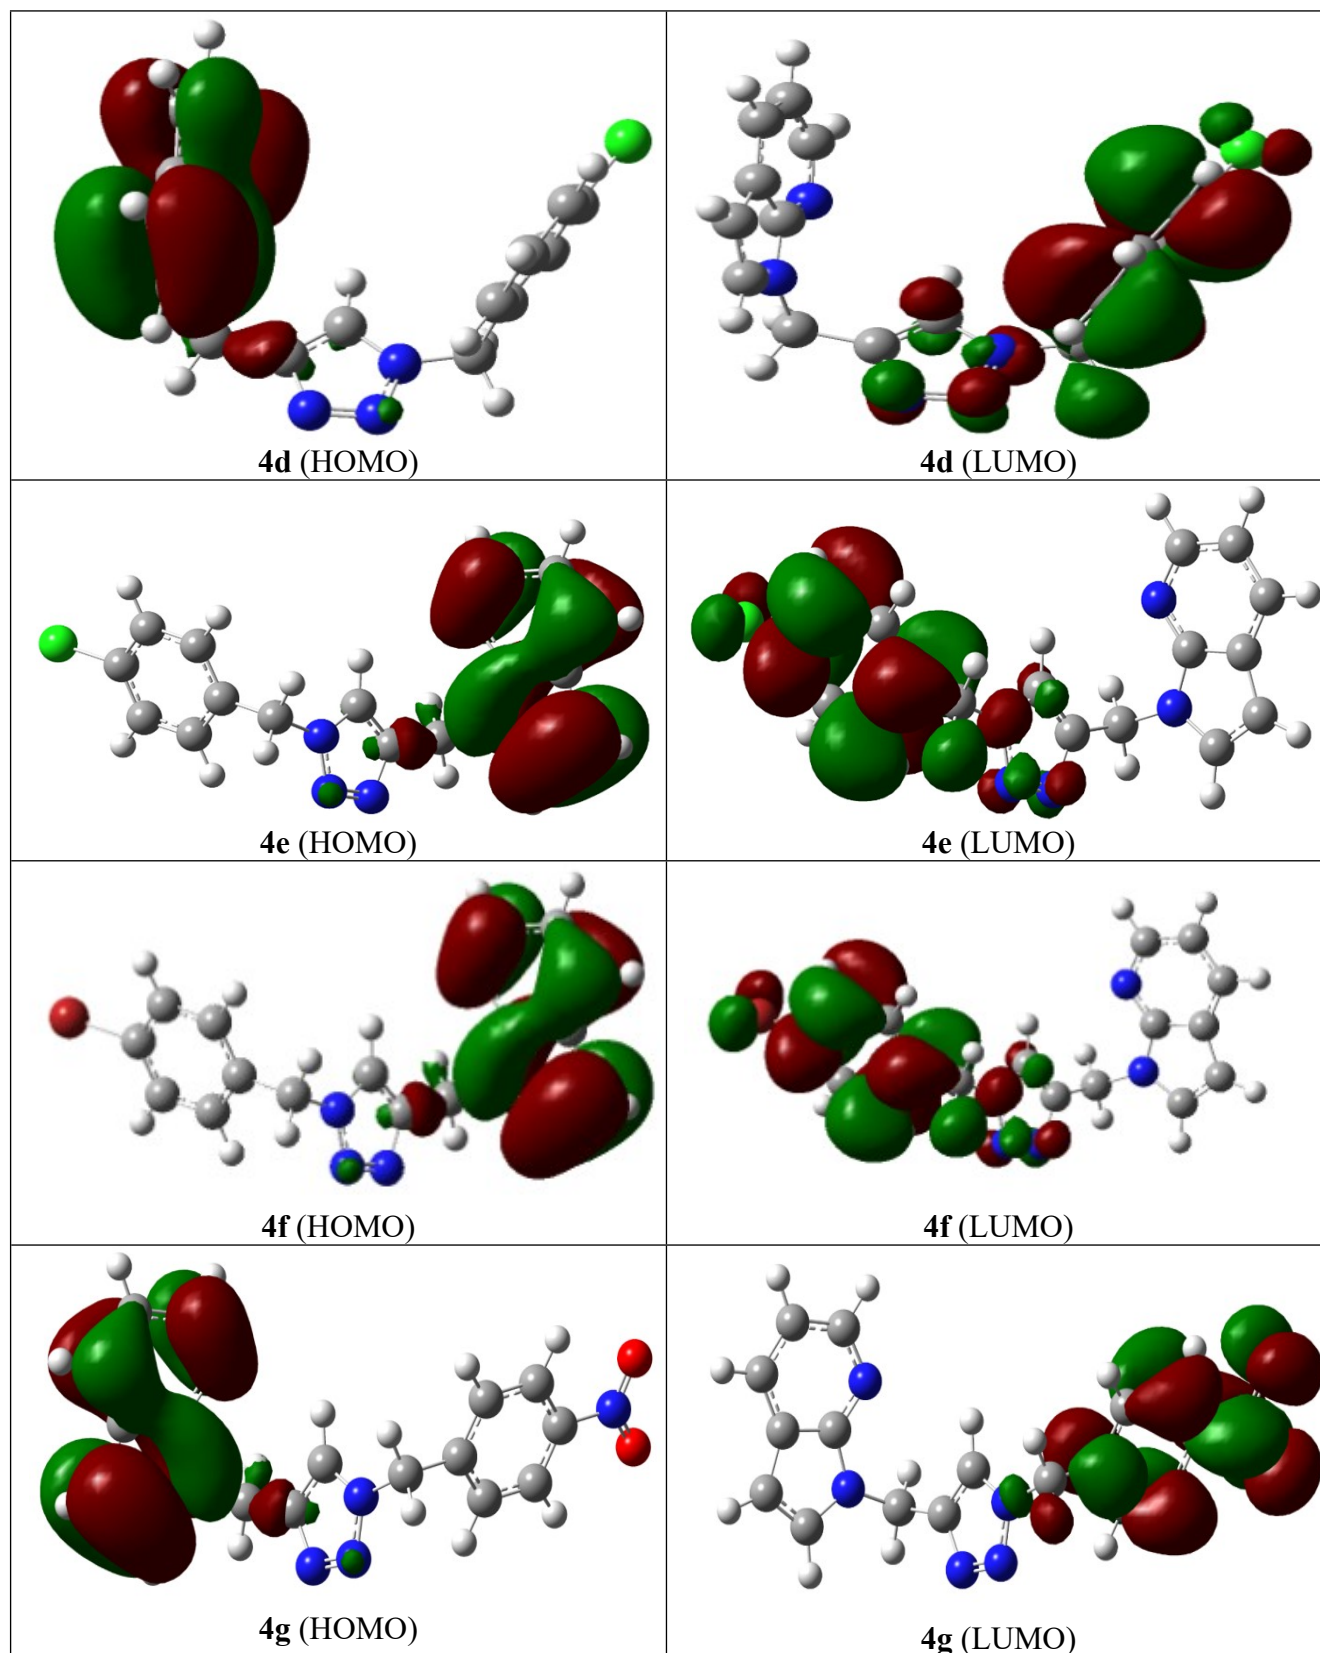

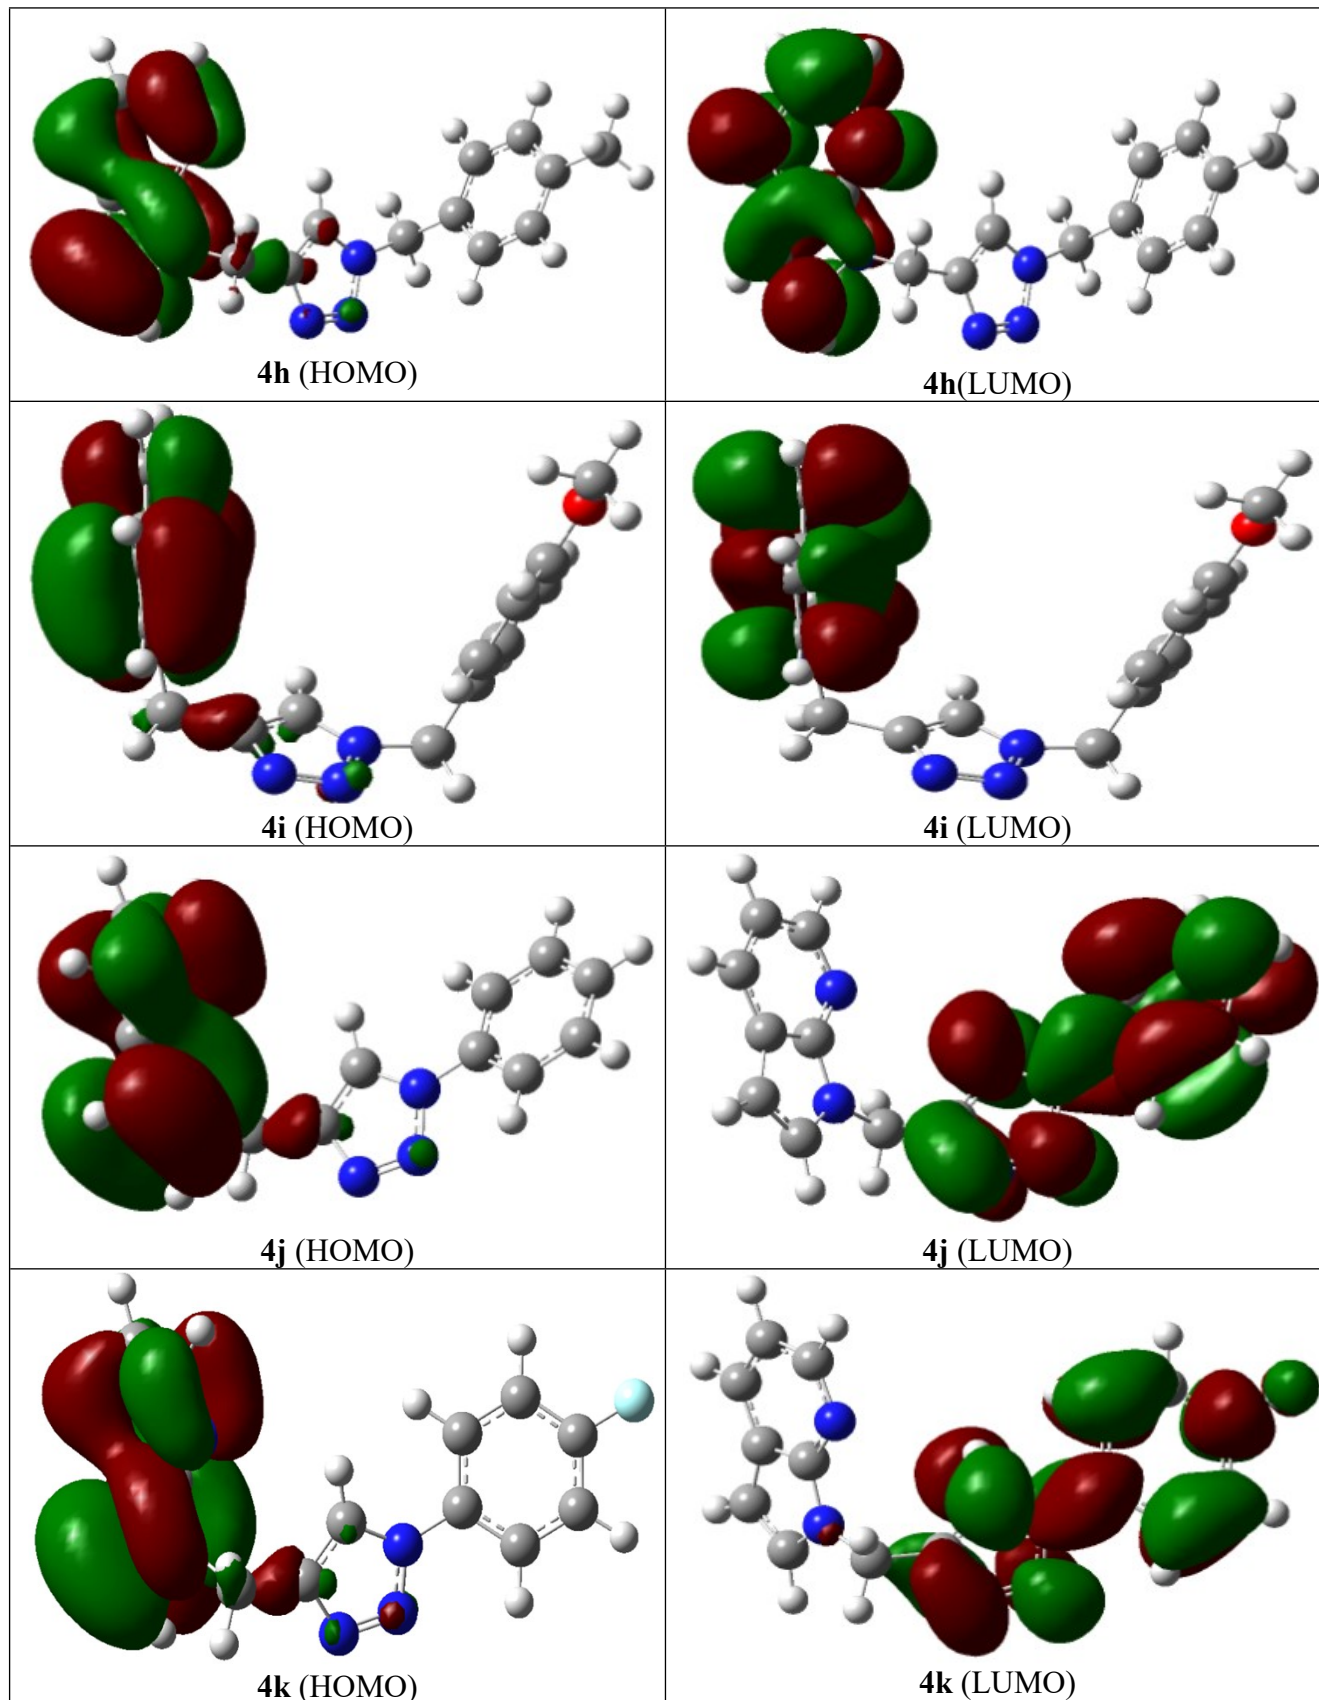

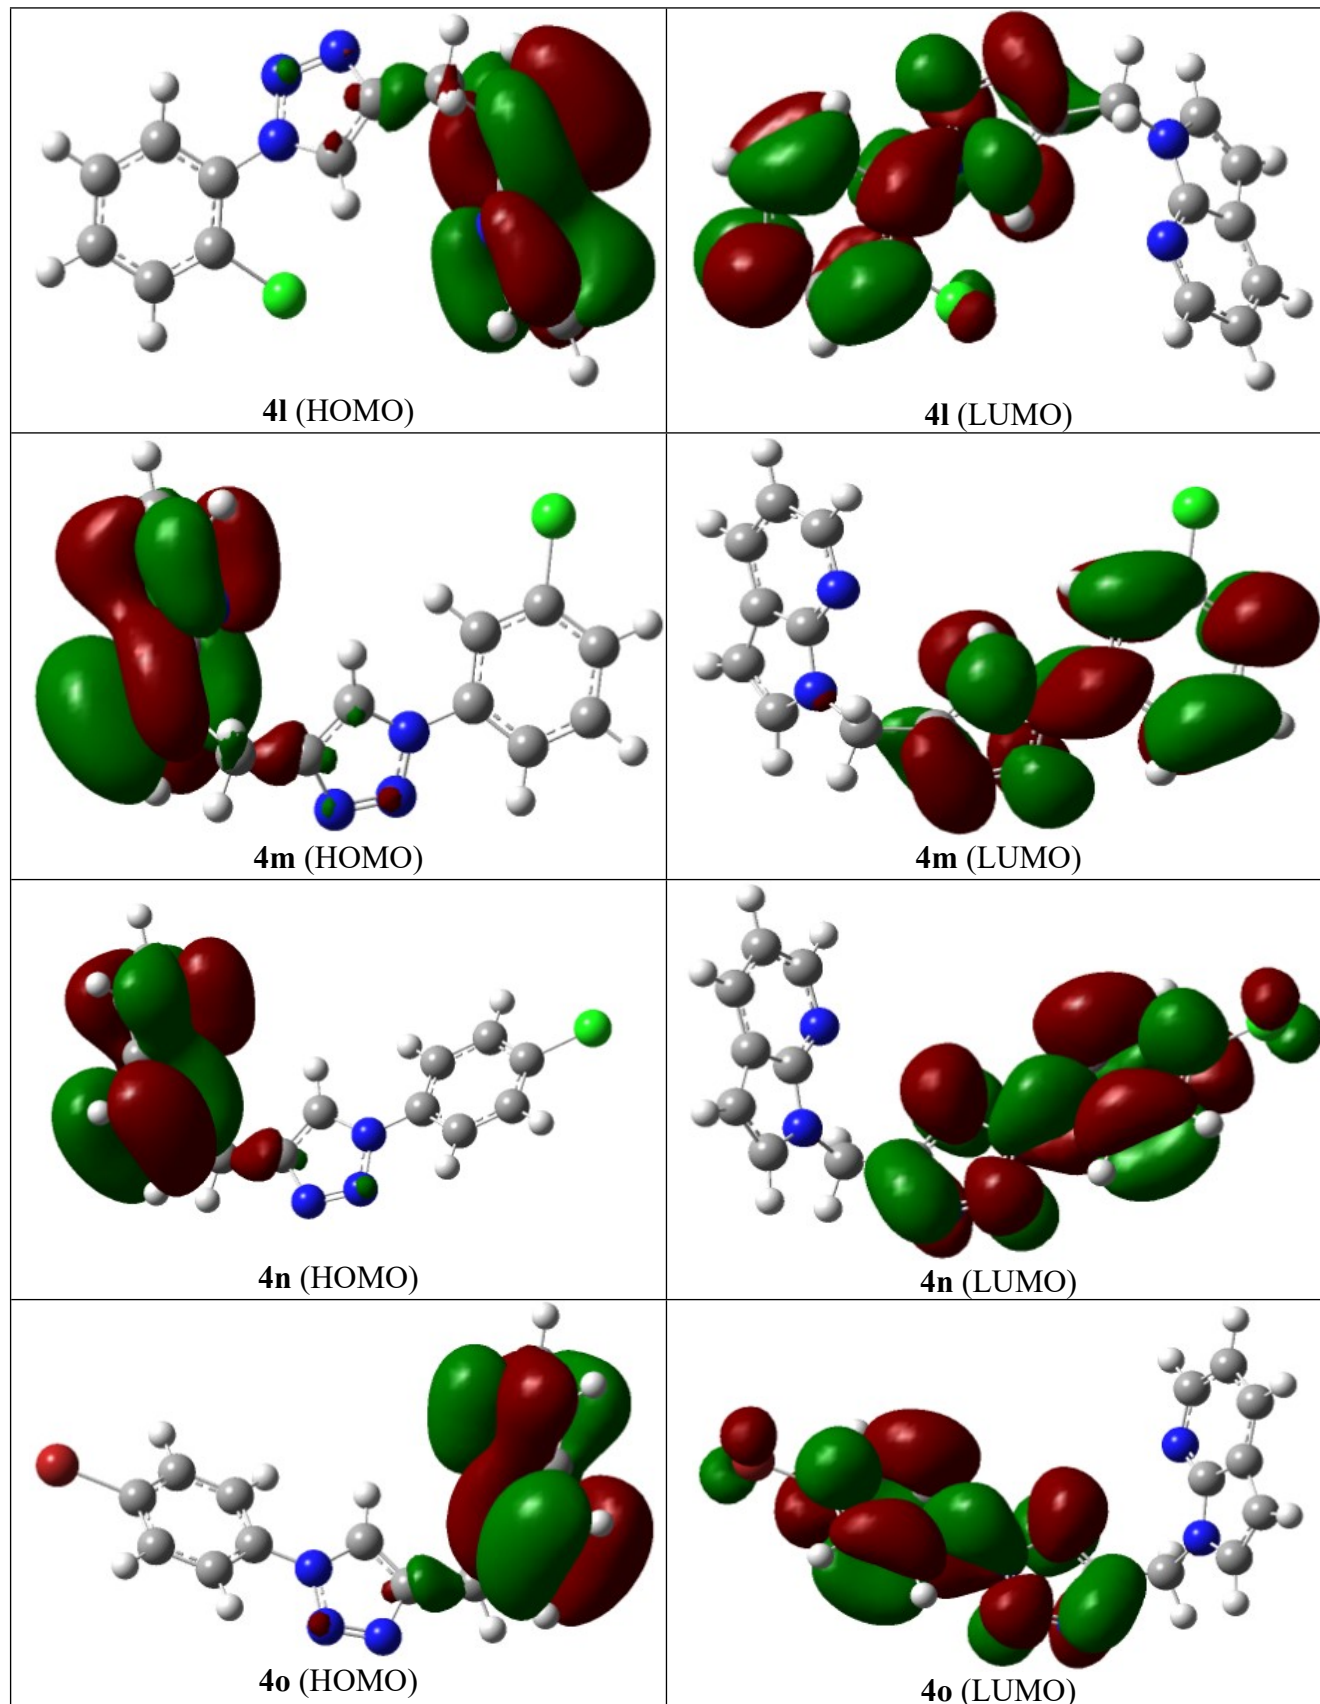



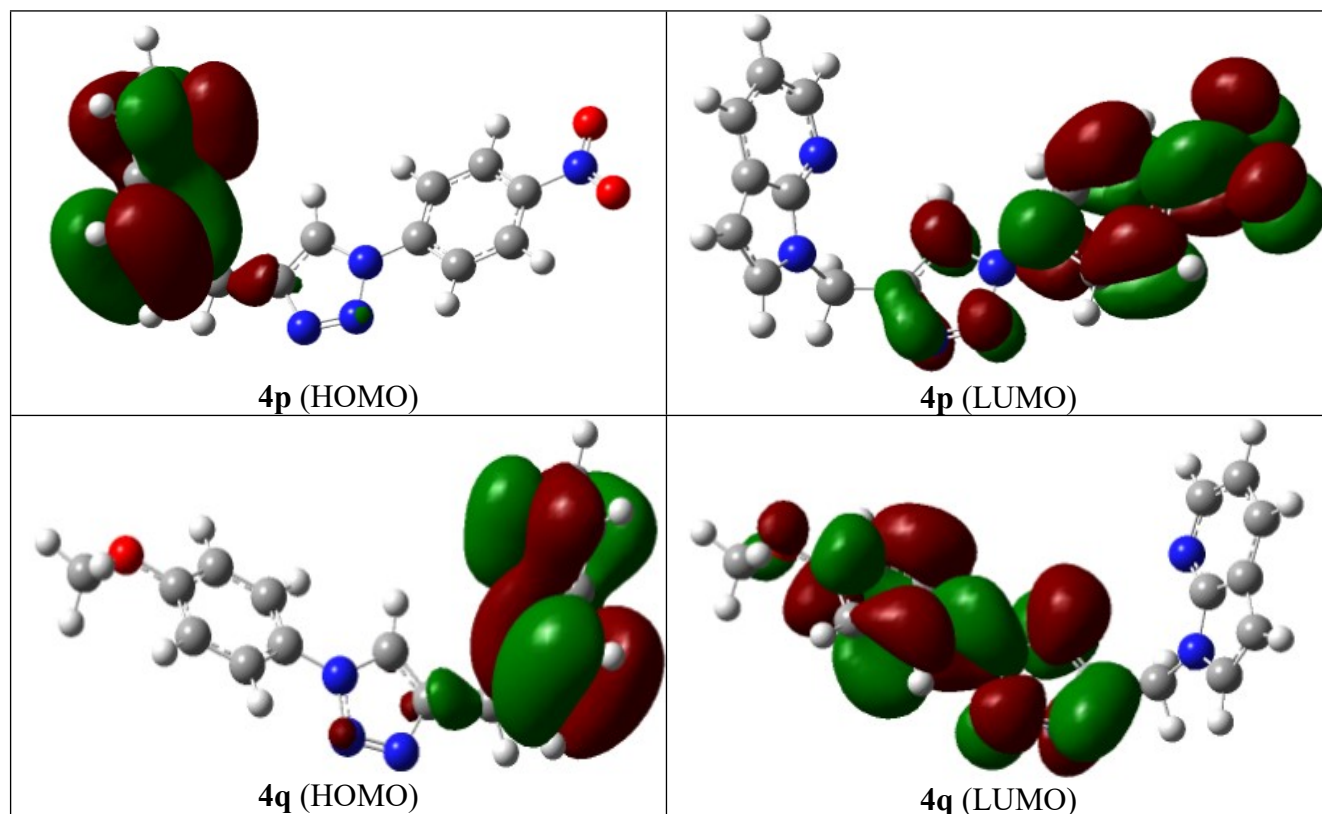

**Figure SI-4.** Highest occupied and lowest unoccupied molecular orbitals (HOMO and LUMO) distribution at the ground state of molecules **2**, and **4a-4q**.

## Experimental

### General procedure for the synthesis of 7-azaindole *N*-linked alkyne (**2**):

To a solution of 7-azaindole (1.0 g, 8.462 mmol) in DMF (5 mL) was added NaH (60% in oil, 304 mg, 12.693 mmol) in portion wise over 10 min at 0°C as per reported procedure.<sup>8</sup> The reaction mixture was stirred for next half hour at same temperature. Propargyl bromide (1.510 mg, 12.693 mmol) was added drop-wise to the above resulting solution and stirred for 2-3 h at room temperature. After completion of the reaction, it was quenched with H<sub>2</sub>O and extracted with EtOAc. The combined EtOAc layers were washed with brine solution, dried over Na<sub>2</sub>SO<sub>4</sub> and concentrated under vacuum. The crude compound was purified by column chromatography on silica gel with EtOAc/hexane as eluent to give the pure desired compound 7-azaindole *N*-linked alkyne (**2**) i.e. 1-(prop-2-yn-1-yl)-1*H*-pyrrolo[2,3-*b*]pyridine.

**General procedure for the synthesis of 7-azaindole *N*-linked aryl 1,2,3-triazoles (4a-4q):**

7-Azaindole *N*-linked alkyne (**2**) (1mmol), benzyl halide (1mmol), and sodium azide (1.2 mmol) and the catalyst (0.1 mol% Cu) CuSO<sub>4</sub>·5H<sub>2</sub>O, sodium ascorbate were added to 10 mL of DMF:H<sub>2</sub>O (4:1 v/v) taken in a round-bottom flask as per reported procedure.<sup>9</sup> The reaction mixture was stirred at rt until TLC analysis shows that the reaction is complete. The reaction mixture was extracted with ethyl acetate and recrystallized. The solvent was evaporated in vacuum to get the desired triazoles (**4a-4q**) in good yield.

**Spectroscopic data of compound(2):**

1-(prop-2-yn-1-yl)-1H-pyrrolo[2,3-b]pyridine (**2**)

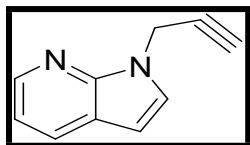

Appearance: brown liquid, Yield: 80%, FTIR (KBr,  $\nu_{\max}/\text{cm}^{-1}$ ): 3292(s), 2121(m), 1508(s), 1305(s)  $\text{cm}^{-1}$ ;  $R_f = 0.4$  (10% EtOAc/*n*-hexane); <sup>1</sup>H NMR (400 MHz, CDCl<sub>3</sub>):  $\delta$  8.33 (dd,  $J=4.8, 1.6\text{Hz}$ , 1H), 7.90 (dd,  $J=8.0, 1.6\text{Hz}$ , 1H), 7.40 (d,  $J=3.6\text{Hz}$ , 1H), 7.07 (dd,  $J=8.0, 4.8\text{Hz}$ , 1H), 6.50 (d,  $J=3.2\text{Hz}$ , 1H), 5.09 (d,  $J=2.8\text{Hz}$ , 2H), 2.39 (t,  $J=2.8\text{Hz}$ , 1H); <sup>13</sup>C NMR (100 MHz, CDCl<sub>3</sub>):  $\delta$  147.15 (C), 143.08 (CH), 129.08 (C), 127.16 (CH), 120.85 (C), 116.21 (CH), 100.59 (CH), 78.27 (CH), 73.26 (CH), 33.68 (CH<sub>2</sub>); ESI-MS [M+H]<sup>+</sup>:  $m/z$  cal. for C<sub>10</sub>H<sub>8</sub>N<sub>2</sub>H<sup>+</sup>: 157.08, found 157.08.

**Spectroscopic data of compounds (4a-q):**

1-((1-benzyl-1H-1,2,3-triazol-4-yl) methyl)-1H-pyrrolo[2,3-b]pyridine (**4a**)

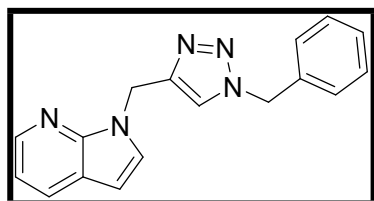

Appearance: Off white solid; yield: 97%; m.p: 56-58°C; FTIR (KBr,  $\nu_{\max}/\text{cm}^{-1}$ ): 3119(m), 3063(m), 2933(m), 1508(s), 1305(s)  $\text{cm}^{-1}$ ; <sup>1</sup>H NMR (400 MHz, CDCl<sub>3</sub>):  $\delta$  8.30 (dd,  $J=1.6, 1.2\text{Hz}$ , 1H), 7.90 (dd,  $J=1.6, 1.2\text{Hz}$ , 1H), 7.41 (s, 1H), 7.38-7.31 (m, 4H), 7.20 (dd,  $J=3.2, 2\text{Hz}$ , 2H), 7.06 (dd,  $J=4.8, 4.4\text{Hz}$ , 1H), 6.45 (d,  $J=3.2\text{Hz}$ , 1H), 5.57 (s, 2H), 5.43(s, 2H); <sup>13</sup>C NMR (100 MHz, DMSO-d<sub>6</sub>):  $\delta$  147.40 (C), 144.58 (CH), 143.05 (C), 136.58 (C), 129.41 (CH), 129.31 (CH), 129.18 (CH), 128.70 (CH), 128.53 (CH), 124.00 (CH), 120.60 (C), 116.38 (CH), 100.22 (CH), 53.33 (CH<sub>2</sub>), 39.41 (CH<sub>2</sub>); ESI-MS [M+H]<sup>+</sup>:  $m/z$  cal. for C<sub>17</sub>H<sub>15</sub>N<sub>5</sub>H<sup>+</sup> is 290.14, found 290.14.

1-((1-(4-fluorobenzyl)-1*H*-1,2,3-triazol-4-yl) methyl)-1*H*-pyrrolo [2,3-*b*]pyridine (**4b**)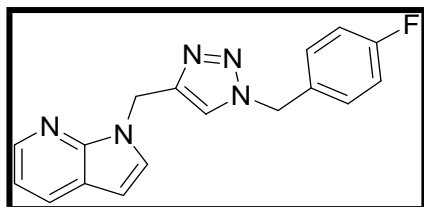

Appearance: Creamish-green solid; yield: 87%, m.p: 50-52°C. FTIR (KBr,  $\nu_{\max}/\text{cm}^{-1}$ ): 3117(m), 3070(s), 2935(m), 1510(s), 1303(s), 1221(m)  $\text{cm}^{-1}$ ;  $^1\text{H}$  NMR (400 MHz,  $\text{CDCl}_3$ ):  $\delta$  8.21 (d,  $J=4\text{Hz}$ , 1H), 7.80 (dd,  $J=7.6, 1.2\text{Hz}$ , 1H), 7.26 (d,  $J=3.6\text{Hz}$ , 1H), 7.13-7.08 (m, 2H), 6.99-6.89 (m, 3H), 6.36 (d,  $J=3.6\text{Hz}$ , 1H), 5.48 (s, 2H), 5.29 (s, 2H);  $^{13}\text{C}$  NMR (100 MHz,  $\text{CDCl}_3$ ):  $\delta$  163.96 (C), 161.49 (C), 147.06 (C) 144.88 (CH), 142.72 (C), 130.22 (CH), 130.19 (CH), 129.88 (CH), 129.81 (CH), 128.84 (CH), 127.91 (CH), 122.23 (CH), 120.59 (C), 116.08 (CH), 115.86 (CH), 100.14 (CH), 53.29 ( $\text{CH}_2$ ), 39.40 ( $\text{CH}_2$ ); ESI-MS  $[\text{M}+\text{H}]^+$ : m/z cal. for  $\text{C}_{17}\text{H}_{14}\text{N}_5\text{FH}^+$  is 308.13, found 308.13.

1-((1-(2-chlorobenzyl)-1*H*-1,2,3-triazol-4-yl) methyl)-1*H*-pyrrolo[2,3-*b*]pyridine (**4c**)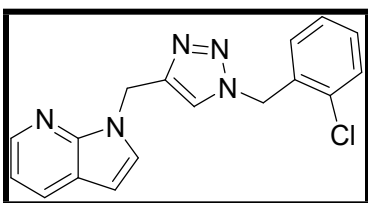

Appearance: Light orange solid; yield: 82.9%; m.p: 58-60°C; FTIR (KBr,  $\nu_{\max}/\text{cm}^{-1}$ ): 3117(s), 3053(m), 2910(m), 1514(s), 1303(s), 727(s)  $\text{cm}^{-1}$ ;  $^1\text{H}$  NMR (400 MHz,  $\text{CDCl}_3$ ):  $\delta$  8.31 (dd,  $J=4.8, 1.6\text{Hz}$ , 1H), 7.90(dd,  $J=7.6, 1.6\text{Hz}$ , 1H), 7.53 (s, 1H), 7.40-7.36 (m, 2H), 7.31-7.19(m, 2H), 7.11(dd,  $J=7.6, 2\text{Hz}$ , 1H), 7.06 (dd,  $J=7.6, 4.8\text{Hz}$ , 1H), 6.45 (d,  $J=3.6\text{ Hz}$ , 1H), 5.59 (s, 2H), 5.57 (s, 2H);  $^{13}\text{C}$  NMR (100 MHz,  $\text{CDCl}_3$ ):  $\delta$  147.04 (C), 144.62 (CH), 142.66 (C), 133.37 (C), 132.23 (C), 130.17 (CH), 130.15 (CH), 129.84 (CH), 128.95 (CH), 127.99 (CH), 127.50 (CH), 122.79 (CH), 120.69 (C), 115.86 (CH), 100.20 (CH), 51.34 ( $\text{CH}_2$ ), 39.44 ( $\text{CH}_2$ ); ESI-MS  $[\text{M}+\text{H}]^+$ : m/z cal. for  $\text{C}_{17}\text{H}_{14}\text{N}_5\text{ClH}^+$  is 324.10, found 324.10.

1-((1-(3-chlorobenzyl)-1*H*-1,2,3-triazol-4-yl) methyl)-1*H*-pyrrolo[2,3-*b*]pyridine (**4d**)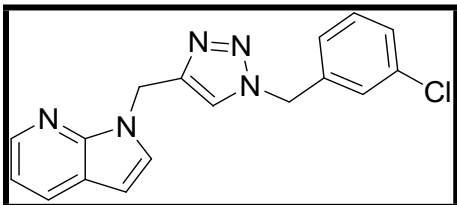

Appearance: Creamish-orange solid; yield: 92%; m.p: 52-54°C; FTIR (KBr,  $\nu_{\max}/\text{cm}^{-1}$ ): 3142(m), 3095(m), 2945(m), 1508(s), 1307(s), 723(s)  $\text{cm}^{-1}$ ;  $^1\text{H}$  NMR (400 MHz,  $\text{DMSO-d}_6$ ):  $\delta$  8.27 (dd,  $J=4.8, 1.2\text{Hz}$ , 1H), 8.10(s, 1H), 7.99-7.95 (dd,  $J=7.6, 1.6\text{Hz}$ , 1H), 7.60 (d,  $J=3.6\text{Hz}$ , 1H), 7.40-7.21 (m, 4H), 7.10 (dd,  $J=7.6, 4.4\text{Hz}$ , 1H), 6.50 (d,  $J=3.6\text{Hz}$ , 1H), 5.58-5.54 (m, 4H);  $^{13}\text{C}$  NMR (100 MHz,  $\text{DMSO-d}_6$ ):  $\delta$  147.42 (C), 144.71 (CH), 143.08 (C), 138.97 (C), 133.96 (C), 131.29 (CH), 129.46 (CH), 129.22(CH), 128.73 (CH),

128.46 (CH), 127.28 (CH), 124.22 (CH), 120.64 (C), 116.42 (CH), 100.26 (CH), 52.57 (CH<sub>2</sub>), 39.46 (CH<sub>2</sub>); ESI-MS [M+H]<sup>+</sup>: m/z cal. for C<sub>17</sub>H<sub>14</sub>N<sub>5</sub>ClH<sup>+</sup> is 324.10, found 324.10.

1-((1-(4-chlorobenzyl)-1*H*-1,2,3-triazol-4-yl) methyl)-1*H*-pyrrolo[2,3-*b*]pyridine (**4e**)

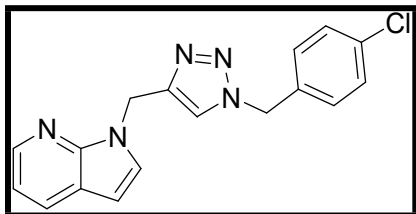

Appearance: Brown solid; yield: 89.44%; m.p: 88-90°C; FTIR (KBr,  $\nu_{\max}/\text{cm}^{-1}$ ): 3117(m), 3053(m), 2968(m), 1514(s), 1303(s), 771(s)  $\text{cm}^{-1}$ ; <sup>1</sup>H NMR (400 MHz, DMSO-*d*<sub>6</sub>):  $\delta$  8.26 (d, *J*=4Hz, 1H), 8.08(s, 1H), 7.97 (dd, *J*=7.6, 1.6Hz, 1H), 7.60 (d, *J*=3.6Hz, 1H), 7.44-7.40 (m, 4H), 7.33-7.28 (m, 2H), 7.10 (dd, *J*=8.0, 4.8Hz, 1H), 6.50 (d, *J*=3.2Hz, 1H), 5.55 (d, *J*=1.2Hz, 4H); <sup>13</sup>C NMR (100 MHz, DMSO-*d*<sub>6</sub>):  $\delta$  147.41 (C), 144.69 (CH), 143.08 (C), 135.59 (C), 133.47 (C), 130.53 (CH), 129.44 (CH), 129.34 (CH), 129.22 (CH), 124.10 (CH), 120.64 (C), 116.43 (CH), 100.26 (CH), 52.55 (CH<sub>2</sub>), 39.43 (CH<sub>2</sub>); ESI-MS [M+H]<sup>+</sup>: m/z cal. for C<sub>17</sub>H<sub>14</sub>N<sub>5</sub>Cl<sup>+</sup> is 324.10, found 324.10.

1-((1-(4-bromobenzyl)-1*H*-1,2,3-triazol-4-yl) methyl)-1*H*-pyrrolo[2,3-*b*]pyridine (**4f**)

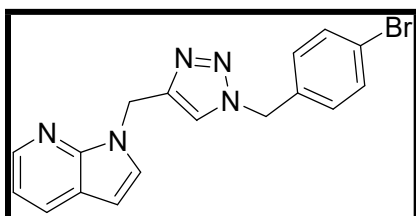

Appearance: Muddy-yellow solid; yield: 87%; m.p: 86-90°C; FTIR (KBr,  $\nu_{\max}/\text{cm}^{-1}$ ): 3117(m), 3063(m), 2945(m), 1512(s), 1305(s), 688(s)  $\text{cm}^{-1}$ ; <sup>1</sup>H NMR (400 MHz, CDCl<sub>3</sub>):  $\delta$  8.33 (s, 1H), 7.90 (d, *J* = 4Hz, 1H), 7.44 (d, *J*=8.4Hz, 3H), 7.35 (d, *J*=3.6Hz, 1H), 7.06 (d, *J*=8.4Hz, 3H), 6.46 (d, *J* = 3.6Hz, 1H), 5.57 (s, 2H), 5.36 (s, 2H); <sup>13</sup>C NMR (100 MHz, CDCl<sub>3</sub>):  $\delta$  147.22 (C), 145.44 (CH), 142.83 (C), 133.51 (C), 132.33 (C), 129.75 (CH), 129.03 (CH), 128.11 (CH), 123.01 (CH), 122.65 (CH), 120.89 (C), 116.14 (CH), 100.37 (CH), 53.57 (CH<sub>2</sub>), 39.64 (CH<sub>2</sub>); ESI-MS [M+H]<sup>+</sup>: m/z cal. for C<sub>17</sub>H<sub>14</sub>N<sub>5</sub>BrH<sup>+</sup> is 368.05, found 368.05.

1-((1-(4-nitrobenzyl)-1*H*-1,2,3-triazol-4-yl) methyl)-1*H*-pyrrolo[2,3-*b*]pyridine (**4g**)

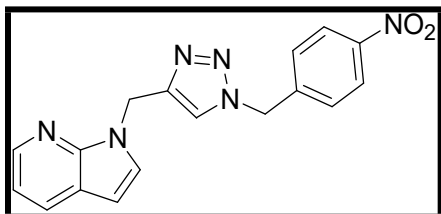

Appearance: Yellow solid; yield: 80.8%; m.p: 95-96°C; FTIR (KBr,  $\nu_{\max}/\text{cm}^{-1}$ ): 3157(m), 3086(m), 2945(m), 1526(m), 1510(s), 1309(s), 348(m)  $\text{cm}^{-1}$ ; <sup>1</sup>H NMR (400 MHz, CDCl<sub>3</sub>):  $\delta$  8.30 (dd, *J* = 4.8, 1.2Hz, 1H), 8.18 (dd, *J*=2.4, 2.0Hz, 2H), 7.90 (dd, *J*=7.6, 1.6Hz, 1H), 7.5 (s, 1H), 7.37-7.32 (m, 3H), 7.07 (dd, *J* = 8, 4.8Hz, 1H), 6.45 (d, *J*=3.6Hz, 1H), 5.60 (s, 2H), 5.54 (s, 2H); <sup>13</sup>C NMR (100 MHz, CDCl<sub>3</sub>):  $\delta$  148.02 (C), 147.07 (C), 145.39 (CH), 142.79 (C), 141.36 (C), 129.01 (CH), 128.54 (CH), 127.98 (CH), 124.23 (CH),

122.71 (CH), 120.71 (C), 115.97 (CH), 100.31 (CH), 53.05 (CH<sub>2</sub>), 39.55 (CH<sub>2</sub>); ESI-MS [M+H]<sup>+</sup> : m/z cal. for C<sub>17</sub>H<sub>14</sub>N<sub>6</sub>O<sub>2</sub>H<sup>+</sup> is 335.13, found 335.12.

1-((1-(4-methylbenzyl)-1*H*-1,2,3-triazol-4-yl) methyl)-1*H*-pyrrolo[2,3-*b*]pyridine (**4h**)

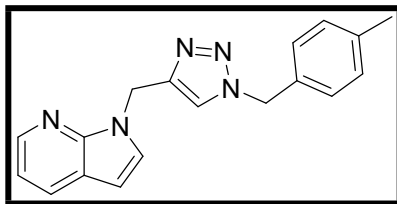

Appearance: Muddy-brown; yield: 92%; m.p: 76-78°C; FTIR (KBr,  $\nu_{\max}/\text{cm}^{-1}$ ): 3117(m), 3053(m), 2901(m), 1514(s), 1317(s)  $\text{cm}^{-1}$ ; <sup>1</sup>H NMR (400 MHz, DMSO-*d*<sub>6</sub>):  $\delta$  8.26 (s, 1H), 8.02 (s, 1H), 7.96(d, *J*=7.6Hz, 1H ), 7.58 (d, *J*=3.6Hz, 1H), 7.20-7.07(m, 5H), 6.49 (d, *J*=3.6Hz, 1H), 5.52 (s, 2H), 5.47(s, 2H),

2.25(s, 3H); <sup>13</sup>C NMR (100 MHz, DMSO-*d*<sub>6</sub>):  $\delta$  147.39 (C), 144.66 (CH), 143.66 (C), 138.08 (C), 133.59 (C), 129.87 (CH), 129.44 (CH), 129.21 (CH), 128.62 (CH), 123.87 (CH), 120.64 (C), 116.42 (CH), 100.24 (CH), 53.16 (CH<sub>2</sub>), 39.41 (CH<sub>2</sub>), 21.30 (CH<sub>3</sub>); ESI-MS [M+H]<sup>+</sup>: m/z cal. for C<sub>18</sub>H<sub>17</sub>N<sub>5</sub>H<sup>+</sup> is 304.16, found 304.15.

1-((1-(4-methoxybenzyl)-1*H*-1,2,3-triazol-4-yl) methyl)-1*H*-pyrrolo[2,3-*b*]pyridine (**4i**)

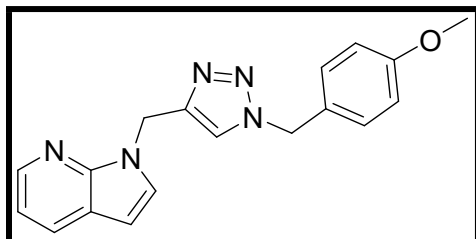

Appearance: Reddish-brown solid, yield: 77.5%, m.p: 60-62°C. FT IR (KBr,  $\nu_{\max}/\text{cm}^{-1}$ ): 3111(m), 3057(m), 2955(m), 1514(s), 1303(s), 1252(m)  $\text{cm}^{-1}$ ; <sup>1</sup>H NMR (400 MHz, DMSO-*d*<sub>6</sub>):  $\delta$  8.26 (s, 1H), 8.01 (s, 1H), 7.97 (dd, *J*=8.0, 0.8Hz, 1H), 7.58 (d, *J*=3.6Hz, 1H), 7.24-7.28 (m, 2H),

7.10 (dd, *J*= 8.0, 4.8Hz, 1H), 6.92-6.88 (m, 2H), 6.49 (d, *J*=3.2Hz, 1H), 5.52 (s, 2H), 5.44 (s, 2H), 3.71 (s, 3H); <sup>13</sup>C NMR (100 MHz, DMSO-*d*<sub>6</sub>):  $\delta$  159.14 (C), 146.78 (C), 142.48 (CH), 129.68(C), 129.67(C), 128.87 (CH), 128.66 (CH), 127.90 (CH), 123.11 (CH), 120.08 (C), 115.86 (CH), 114.12 (CH), 99.68 (CH), 55.14 (CH<sub>2</sub>), 52.34 (CH<sub>3</sub>), 38.84 (CH<sub>2</sub>); ESI-MS [M+H]<sup>+</sup>: m/z cal. for C<sub>18</sub>H<sub>17</sub>N<sub>5</sub>OH<sup>+</sup> is 320.15, found 320.15.

1-((1-phenyl-1*H*-1,2,3-triazol-4-yl) methyl)-1*H*-pyrrolo[2,3-*b*]pyridine (**4j**)

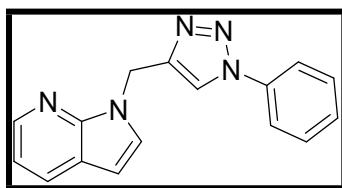

Appearance: Colourless crystalline solid; yield: 84%; m.p: 72-74°C; FTIR (KBr,  $\nu_{\max}/\text{cm}^{-1}$ ): 3144(m), 3051(m), 2941(m), 1506(s), 1300(s)  $\text{cm}^{-1}$ ; <sup>1</sup>H NMR (400 MHz, CDCl<sub>3</sub>):  $\delta$  8.35 (dd, *J*= 4.8, 1.6Hz, 1H), 7.89-7.94 (m, 2H), 7.67-7.61 (m, 2H), 7.50-7.35(m, 4H),

7.08(m, 1H), 6.48 (d, *J*=3.6Hz ,1H), 5.68 (s, 2H); <sup>13</sup>C NMR (100 MHz, CDCl<sub>3</sub>):  $\delta$  147.08 (C), 142.75 (CH), 136.87 (C), 129.63 (C), 129.05 (CH), 128.74 (CH), 128.05 (C), 125.22 (CH),

120.81 (CH), 120.50 (CH), 116.01 (CH), 115.59 (CH), 100.35 (CH), 39.54 (CH<sub>2</sub>); ESI-MS [M+H]<sup>+</sup>: m/z cal. for C<sub>16</sub>H<sub>13</sub>N<sub>5</sub>H<sup>+</sup> is 276.12, found 276.12.

1-((1-(4-fluorophenyl)-1*H*-1,2,3-triazol-4-yl) methyl)-1*H*-pyrrolo[2,3-*b*]pyridine (**4k**)

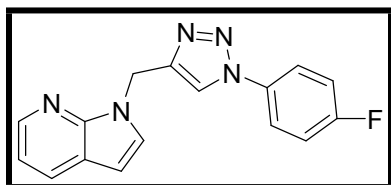

Appearance: Off white needles, yield: 84.5%, m.p: 76-78°C. FTIR (KBr,  $\nu_{\max}/\text{cm}^{-1}$ ): 3125(m), 3074(m), 2937(m), 1514(s), 1305(s), 1227(m)  $\text{cm}^{-1}$ ; <sup>1</sup>H NMR (400 MHz, CDCl<sub>3</sub>):  $\delta$  8.35 (dd,  $J=4.8, 1.2\text{Hz}$ , 1H), 7.94-7.87 (m, 2H), 7.58-7.65 (m, 2H), 7.42 (d,  $J=3.6\text{Hz}$ , 1H), 7.19-7.12 (m, 2H), 7.09 (dd,  $J=7.6, 4.4\text{Hz}$ , 1H), 6.49 (d,  $J=3.6\text{Hz}$ , 1H), 5.67 (s, 2H); <sup>13</sup>C NMR (100 MHz, CDCl<sub>3</sub>):  $\delta$  163.59 (C), 161.12 (C), 147.13 (CH), 145.30 (C), 142.89 (C), 133.14 (CH), 129.01 (CH), 127.99 (CH), 122.52 (CH), 122.44 (CH), 120.89 (C), 120.72 (CH), 116.72 (CH), 116.49 (CH), 116.00 (CH), 100.34(CH), 39.49 (CH<sub>2</sub>); ESI-MS [M+H]<sup>+</sup>: m/z cal. for C<sub>16</sub>H<sub>12</sub>N<sub>5</sub>FH<sup>+</sup> is 294.11, found 294.11.

1-((1-(2-chlorophenyl)-1*H*-1,2,3-triazol-4-yl) methyl)-1*H*-pyrrolo[2,3-*b*]pyridine (**4l**)

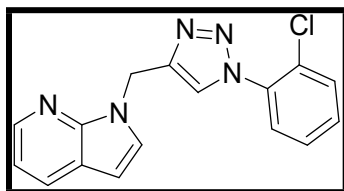

Appearance: Off white solid, yield: 92%, m.p: 58-60°C. FTIR (KBr,  $\nu_{\max}/\text{cm}^{-1}$ ): 3157(m), 3073(m), 2924(m), 1508(s), 1311(s), 768(s)  $\text{cm}^{-1}$ ; <sup>1</sup>H NMR (400 MHz, CDCl<sub>3</sub>):  $\delta$  8.35-8.32 (m, 1H), 7.94(s, 1H), 7.93-7.89 (m, 1H), 7.56-7.50 (m, 2H), 7.46-7.34 (m, 3H), 7.07(dd,  $J=4.8, 8.0\text{Hz}$ , 1H), 6.49 (d,  $J=3.6\text{Hz}$ , 1H), 5.70 (s, 2H); <sup>13</sup>C NMR (100 MHz, CDCl<sub>3</sub>):  $\delta$  147.21 (C), 144.15 (CH), 142.85 (C), 134.71 (C), 130.70 (C), 130.66(CH), 128.91 (CH), 128.54 (CH), 127.78 (CH), 127.68 (CH), 124.63(CH), 120.68 (C), 115.93 (CH), 100.29(CH), 39.45 (CH<sub>2</sub>); ESI-MS [M+H]<sup>+</sup>: m/z cal. for C<sub>16</sub>H<sub>12</sub>ClN<sub>5</sub>H<sup>+</sup> is 310.085, found 310.088.

1-((1-(3-chlorophenyl)-1*H*-1,2,3-triazol-4-yl) methyl)-1*H*-pyrrolo[2,3-*b*]pyridine (**4m**)

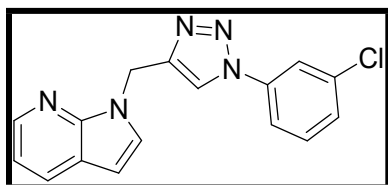

Appearance: Light brown solid, yield: 84.66%, m.p: 52-54°C. FTIR (KBr,  $\nu_{\max}/\text{cm}^{-1}$ ): 3124(m), 3086(m), 3057(m), 1510(s), 1315(s), 727(s)  $\text{cm}^{-1}$ ; <sup>1</sup>H NMR (400 MHz, CDCl<sub>3</sub>):  $\delta$  8.39 (s, 1H), 7.93 (d,  $J=7.2\text{Hz}$ , 2H), 7.70 (d,  $J=1.6\text{Hz}$ , 1H), 7.57-7.52 (m, 1H), 7.42-7.33 (m, 3H), 7.11 (d,  $J=3.2\text{Hz}$ , 1H), 6.50 (d,  $J=1.2\text{Hz}$ , 1H), 5.68 (s, 2H); <sup>13</sup>C NMR (100 MHz, CDCl<sub>3</sub>):  $\delta$  147.27 (C), 143.01 (CH), 142.94 (C), 137.89 (C), 135.64 (C), 130.89 (CH), 129.18 (CH), 128.96 (CH), 128.13 (CH), 120.89 (C), 120.54 (CH), 118.60 (CH), 116.44

(CH), 116.31 (CH), 100.61 (CH), 39.71 (CH<sub>2</sub>); ESI-MS [M+H]<sup>+</sup>: m/z cal. for C<sub>16</sub>H<sub>12</sub>N<sub>5</sub>ClH<sup>+</sup> is 310.085, found 310.085.

1-((1-(4-chlorophenyl)-1*H*-1,2,3-triazol-4-yl) methyl)-1*H*-pyrrolo[2,3-*b*]pyridine (**4n**)

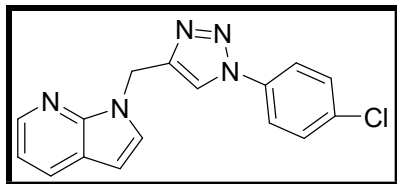

Appearance: Off white needles; yield: 83.8%; m.p: 86-88°C; FTIR (KBr,  $\nu_{\max}/\text{cm}^{-1}$ ): 3128(m), 3057(m), 2941(m), 1508(s), 1305(s), 1508(s), 1305(s), 717(s)  $\text{cm}^{-1}$ ; <sup>1</sup>H NMR (400 MHz, CDCl<sub>3</sub>):  $\delta$  8.35 (dd,  $J=4.8, 1.6\text{Hz}$ , 1H), 7.95-7.89 (m, 2H), 7.62-7.57 (m, 2H), 7.47-7.40 (m, 3H), 7.09 (dd,  $J=8, 4.8\text{ Hz}$ , 1H), 6.49 (d,  $J=3.6\text{Hz}$ , 1H), 5.68 (s, 2H); <sup>13</sup>C NMR (100 MHz, CDCl<sub>3</sub>):  $\delta$  147.22 (C), 145.44 (CH), 142.83 (C), 133.51 (C), 132.33 (C), 129.75 (CH), 129.03 (CH), 128.11 (CH), 123.01 (C), 120.89 (CH), 116.14 (CH), 100.37(CH), 53.57 (CH), 39.64 (CH<sub>2</sub>); ESI-MS [M+H]<sup>+</sup>: m/z cal. for C<sub>16</sub>H<sub>12</sub>N<sub>5</sub>ClH<sup>+</sup> is 310.085, found 310.089.

1-((1-(4-bromophenyl)-1*H*-1,2,3-triazol-4-yl) methyl)-1*H*-pyrrolo[2,3-*b*]pyridine(**4o**)

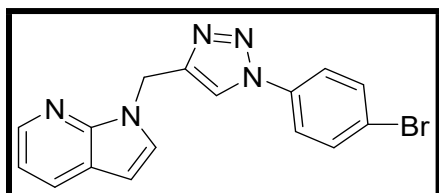

Appearance: Off white needles; yield: 84%; m.p: 96-98°C; FTIR (KBr,  $\nu_{\max}/\text{cm}^{-1}$ ): 3136(m), 3097(m), 3040(m), 2940(m), 1508(s), 1305(s), 685(s)  $\text{cm}^{-1}$ ; <sup>1</sup>H NMR (400 MHz, CDCl<sub>3</sub>):  $\delta$  8.28 (dd,  $J=4.8, 1.2\text{Hz}$ , 1H), 7.87-7.81 (m, 2H), 7.55-7.50 (m, 2H), 7.49-7.44 (m, 2H), 7.34 (d,  $J=3.6\text{ Hz}$ , 1H), 7.02 (dd,  $J=7.6, 4.8\text{ Hz}$ , 1H), 6.42 (d,  $J=3.6\text{Hz}$ , 1H), 5.60 (s, 2H); <sup>13</sup>C NMR (100 MHz, CDCl<sub>3</sub>):  $\delta$  147.16 (C), 145.50 (CH), 142.93 (C), 135.83 (C), 132.81 (C), 129.03 (CH), 127.97 (CH), 122.42 (CH), 121.88 (CH), 120.74 (C), 120.56 (CH), 116.05 (CH), 100.40 (CH), 39.52 (CH); ESI-MS [M+H]<sup>+</sup>: m/z cal. for C<sub>16</sub>H<sub>12</sub>N<sub>5</sub>BrH<sup>+</sup> is 354.035, found 354.041.

1-((1-(4-nitrophenyl)-1*H*-1,2,3-triazol-4-yl) methyl)-1*H*-pyrrolo[2,3-*b*]pyridine (**4p**)

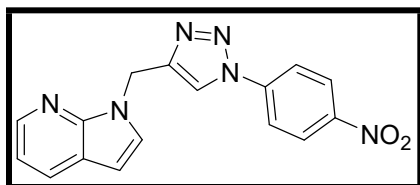

Appearance: Off white solid; yield: 83%; m.p: 196-198°C; FTIR (KBr,  $\nu_{\max}/\text{cm}^{-1}$ ): 3127(m), 3074(m), 2930(m), 1506(s), 1529(s), 1344(s), 1313(s)  $\text{cm}^{-1}$ ; <sup>1</sup>H NMR (400 MHz, CDCl<sub>3</sub>):  $\delta$  8.50-8.25 (m, 3H), 8.05 (s, 1H), 7.91 (dd,  $J=9.2, 16.8\text{Hz}$ , 3H), 7.42 (d,  $J=3.6\text{Hz}$ , 1H), 7.11 (dd,  $J=4.4, 8\text{Hz}$ , 1H), 6.51 (d,  $J=3.2\text{Hz}$ , 1H), 5.70 (s, 2H); <sup>13</sup>C NMR (100 MHz, CDCl<sub>3</sub>):  $\delta$  147.23 (C), 147.17 (C), 146.16 (C), 143.02 (CH), 141.01 (C), 129.15

(CH), 127.96 (CH), 125.46 (CH), 120.81 (CH), 120.64 (C), 120.48 (CH), 116.16 (CH), 100.57 (CH), 39.52 (CH<sub>2</sub>); ESI-MS [M+H]<sup>+</sup>: m/z cal. for C<sub>16</sub>H<sub>12</sub>N<sub>6</sub>O<sub>2</sub>H<sup>+</sup> is 321.11, found 321.11.

1-((1-(4-methoxyphenyl)-1*H*-1,2,3-triazol-4-yl) methyl)-1*H*-pyrrolo[2,3-*b*]pyridine (**4q**)

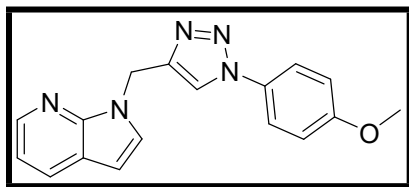

Appearance: Grey solid, Yield: 79%, m.p: 72-74°C. FTIR (KBr,  $\nu_{\max}/\text{cm}^{-1}$ ): 3136(m), 3088(m), 2935(m), 2835(m), 1519(s), 1305(s), 1248(s)  $\text{cm}^{-1}$ ; <sup>1</sup>H NMR (400 MHz, CDCl<sub>3</sub>):  $\delta$  8.39 (s, 1H), 7.94 (d,  $J=7.6\text{Hz}$ , 1H), 7.88 (s, 1H), 7.57-7.52 (m, 2H), 7.44 (d,  $J=3.2\text{Hz}$ , 1H), 7.11 (s, 1H), 6.99-6.94 (m, 2H), 5.69 (s, 2H), 3.38 (s, 3H); <sup>13</sup>C NMR (100 MHz, CDCl<sub>3</sub>):  $\delta$  159.92 (C), 147.21 (C), 142.49 (CH), 130.68 (C), 130.60 (C), 129.14 (CH), 128.33 (CH), 128.25 (CH), 122.34 (CH), 121.23 (C), 116.15 (CH), 114.83 (CH), 100.52 (CH), 55.72 (CH<sub>2</sub>), 39.79 (CH<sub>3</sub>); ESI-MS [M+H]<sup>+</sup>: m/z cal. for C<sub>17</sub>H<sub>15</sub>N<sub>5</sub>OH<sup>+</sup> is 306.13, found 306.13.

## References:

1. Krause, L., Herbst-Irmer, R., Sheldrick G.M. & Stalke D. *J. Appl. Cryst.* 2015, **48**, 3.
2. G. M. Sheldrick, *Acta Crystallogr C Struct Chem.* 2015, **71**, 3.
3. J. L. Farrugia, G. X. Win, *J. Appl. Crystallogr.*, 1999, **32**, 837.
4. L. H. Mendoza-Huizar, C. H. Rios-Reyes *J Mex Chem Soc* 2011, **55**, 142.
5. I. Piyanzina, B. Minisini, D. Tayurskii, J. F. Bardeau, *J Mol. Model.* 2015, **21**, 34.
6. M. Elango, R. Parthasarathi, V. Subramanian, U. Sarkar, P.K. Chattaraj, *J. Mol. Str. THEOCHEM* 2005, **723**, 43.
7. R. G. Parr, L. V. Szentpaly, S. Liu, *J. Am. Chem. Soc.* 1999, **121**, 1922.
8. P. K. Naikawadi, L. Mucherla, R. Dandela, M. Sambari, K.S. Kumar, *Adv. Synth. Catal* 2021, **363**, 3796.
9. L. Jing, X. W. Hao, F.A. Olotu, D. Kang, C.H. Chen, K.H. Lee, M. E. S. Solima, X. Liu, Y. Song, P. Zhan, *Eur. J. Med. Chem*, 2019, **183**, 111696.





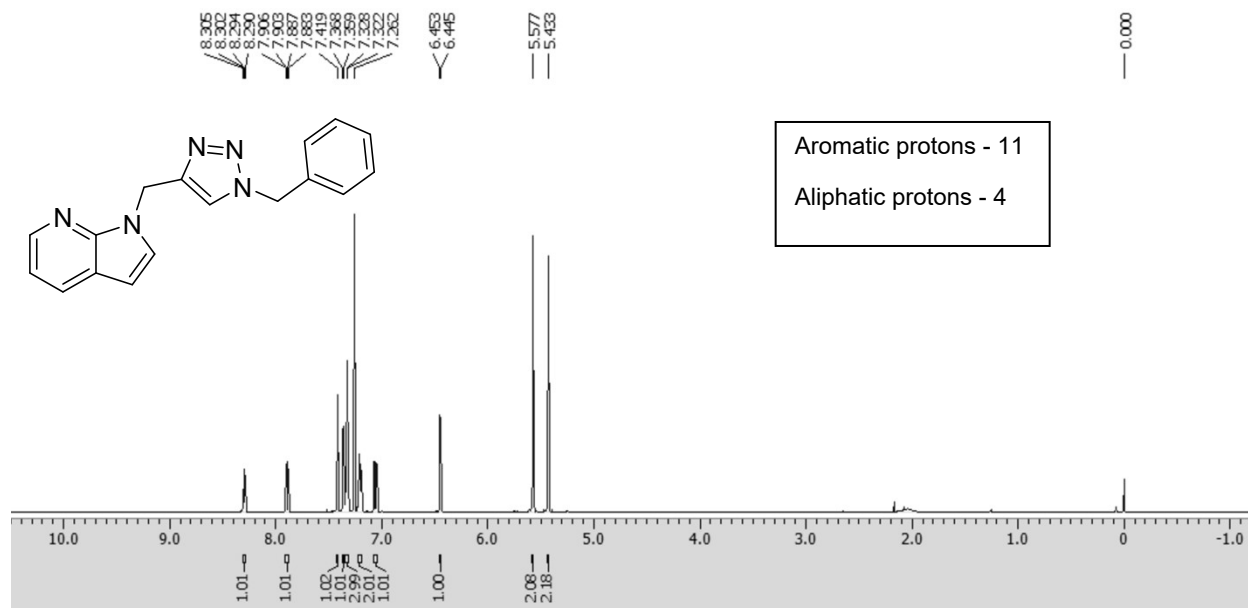Figure SI-7.  $^1\text{H-NMR}$  (4a)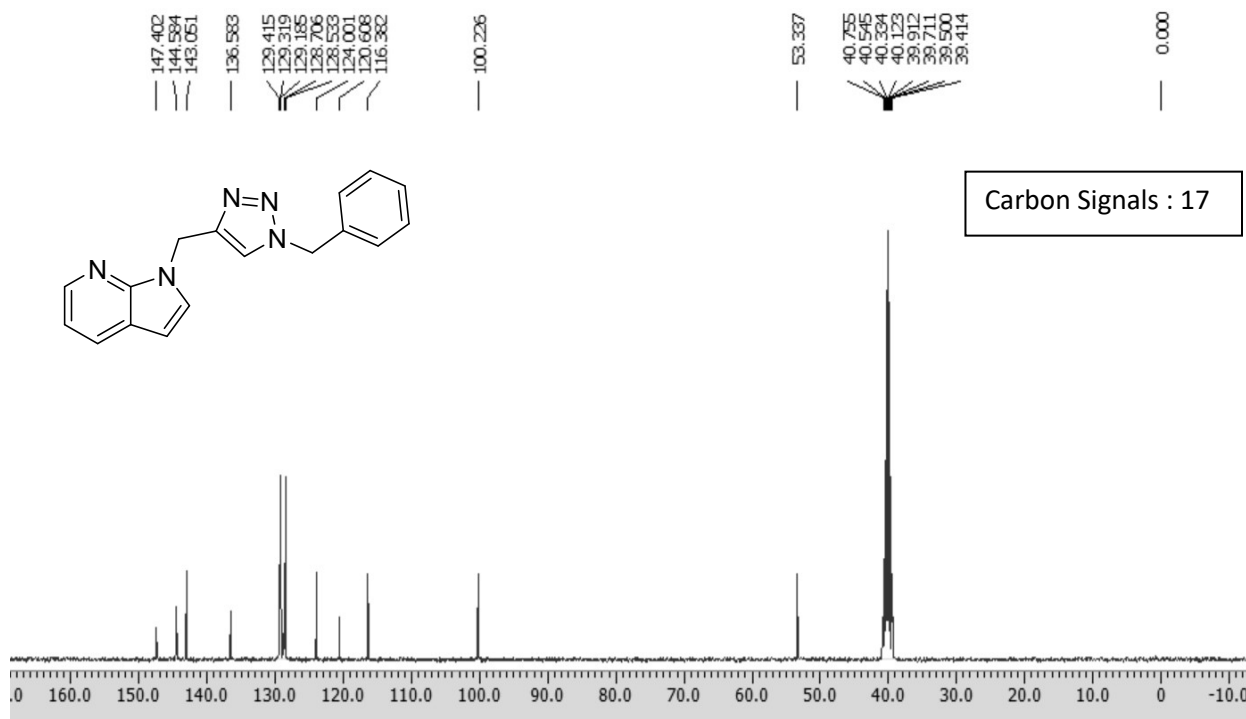Figure SI-8.  $^{13}\text{C NMR}$  (4a)

Sample Name : KS\_01  
Test Name :  
010622\_KS\_01 34 (0.592)

IITRPR

XEVO G2-XS QTOF

1: TOF MS ES+  
2.57e7

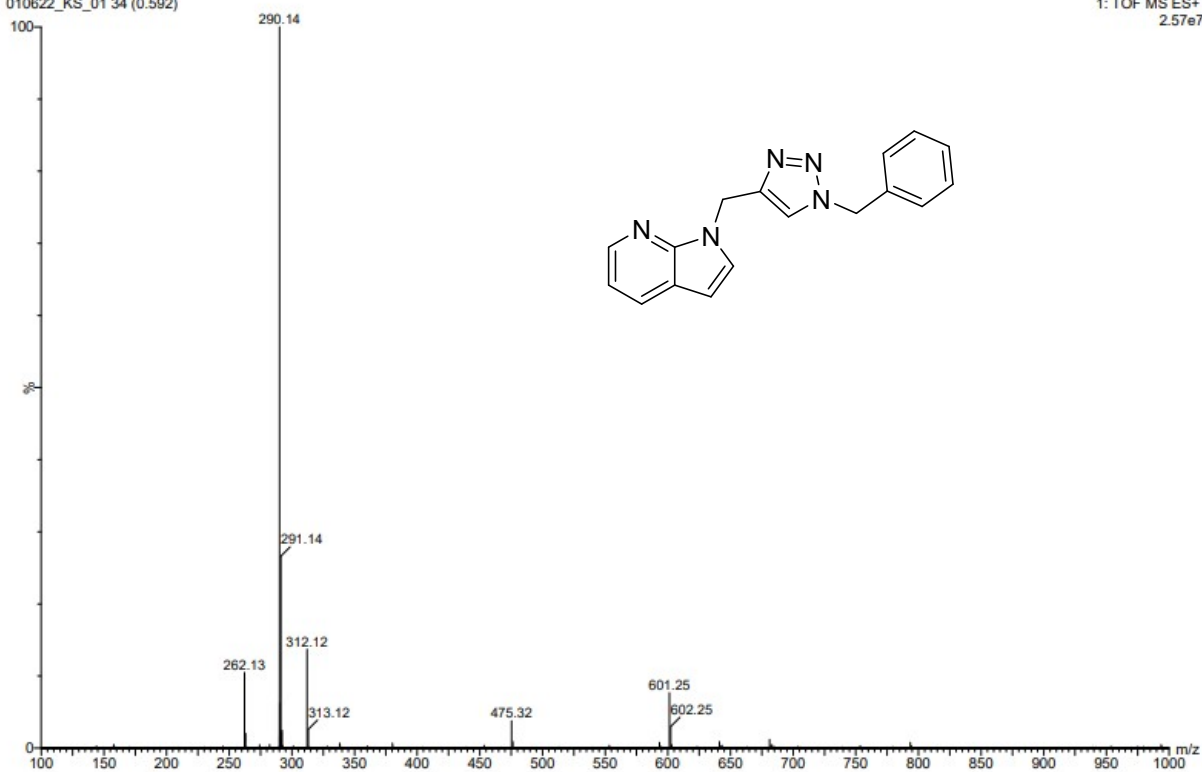

Figure SI-9. ESI-MS  $[M+H]^+$  : m/z for (4a)  $C_{17}H_{15}N_5$ : 290.14

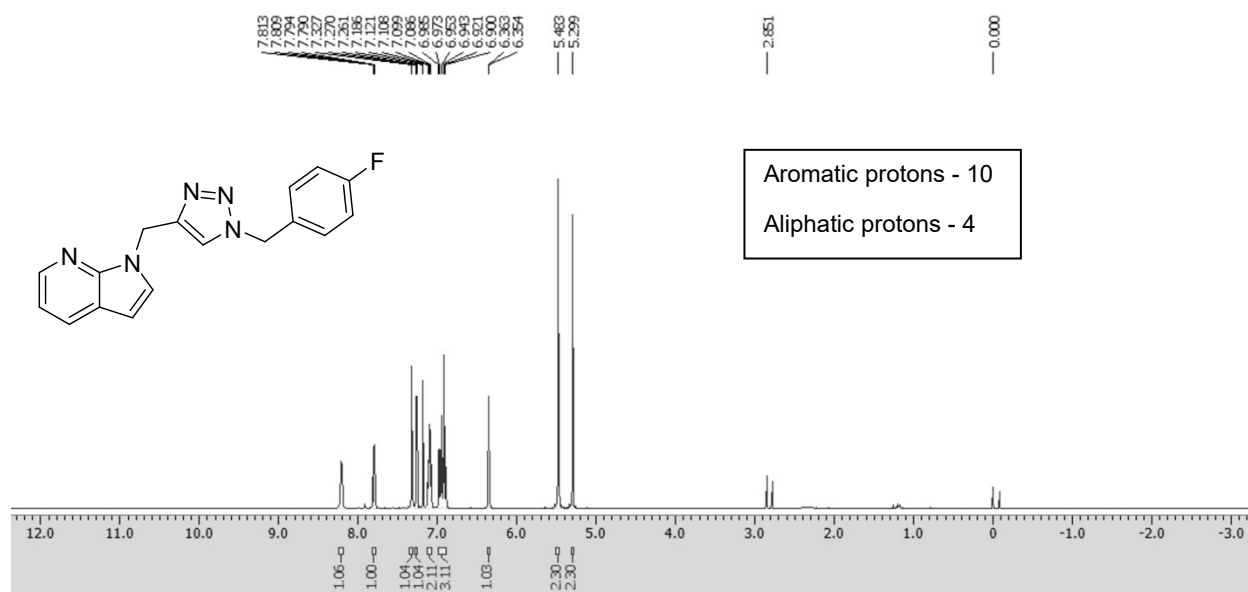Figure SI-10. <sup>1</sup>H-NMR (4b)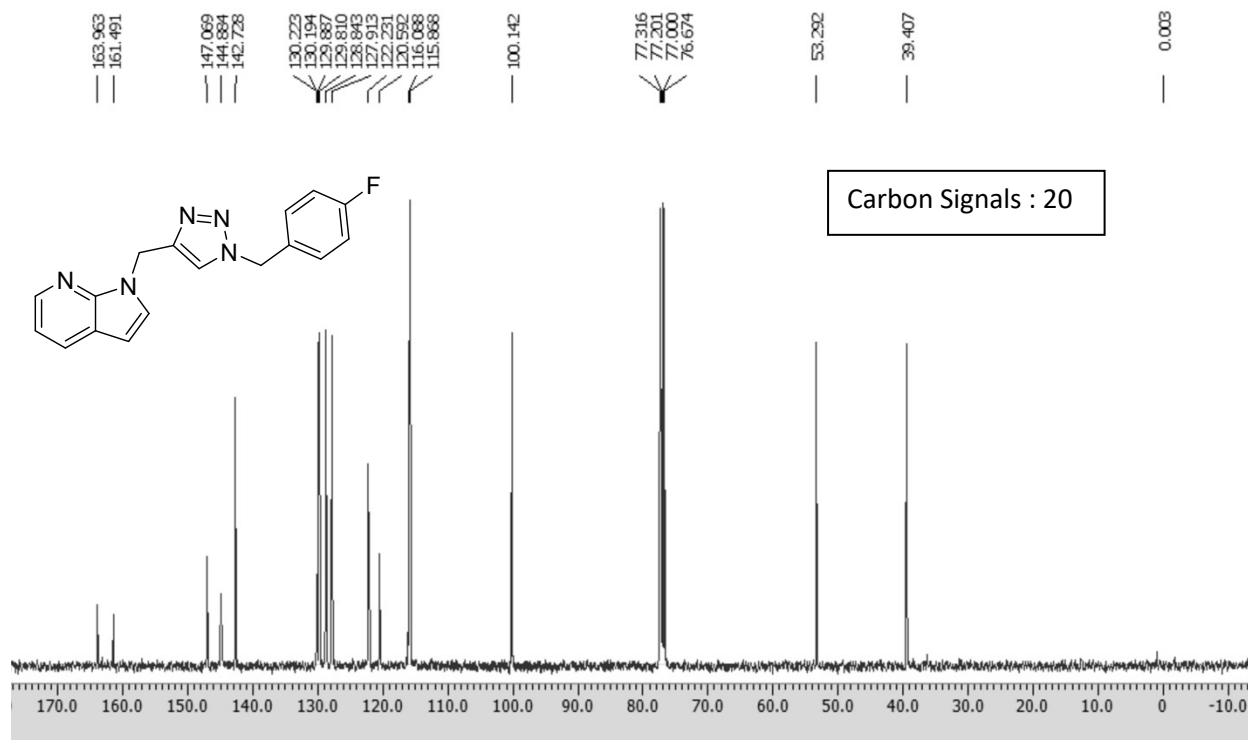Figure SI-11. <sup>13</sup>C-NMR (4b)

Sample Name : KS\_05  
Test Name :  
010622\_KS\_05 18 (0.321)

IITRPR

XEVO G2-XS QTOF

1: TOF MS ES+  
2.05e8

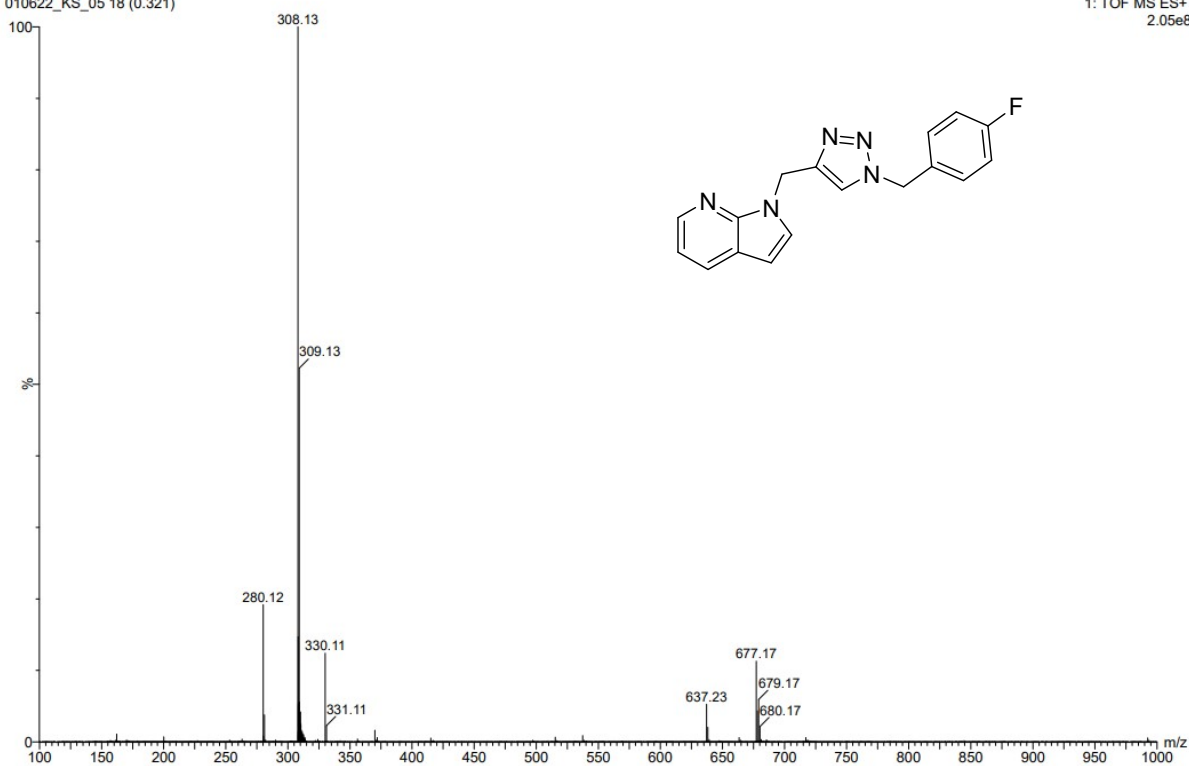

Figure SI-12. ESI-MS  $[M+H]^+$  : m/z for (4b)  $C_{17}H_{14}N_3F$  : 308.13

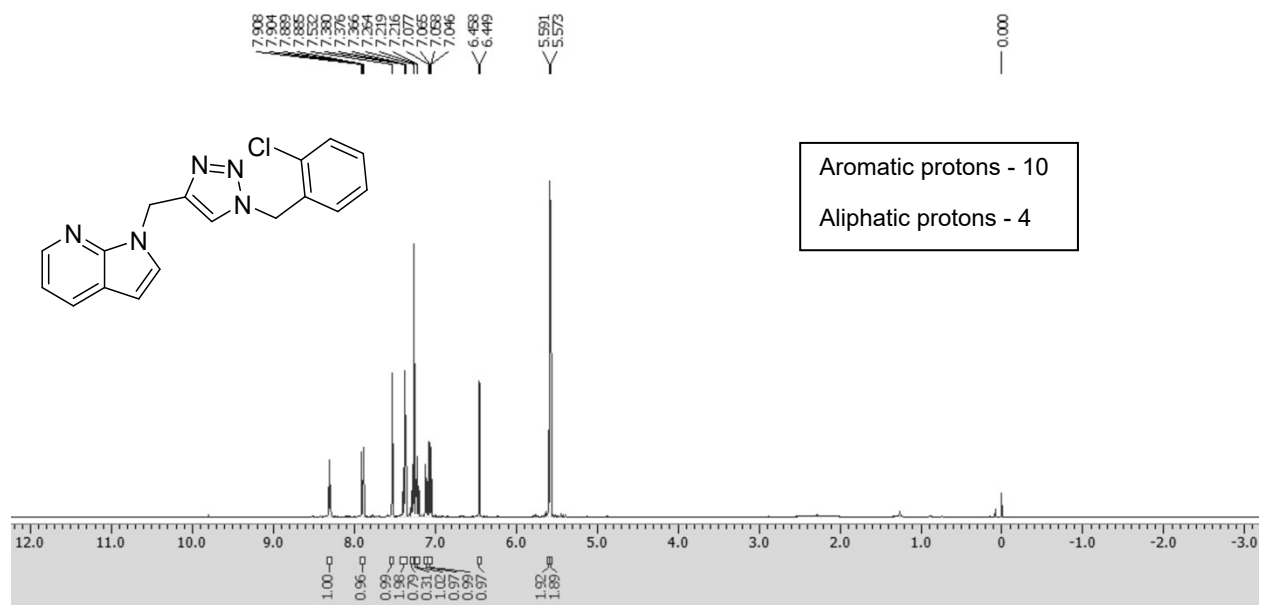Figure SI-13.  $^1\text{H-NMR}$  (4c)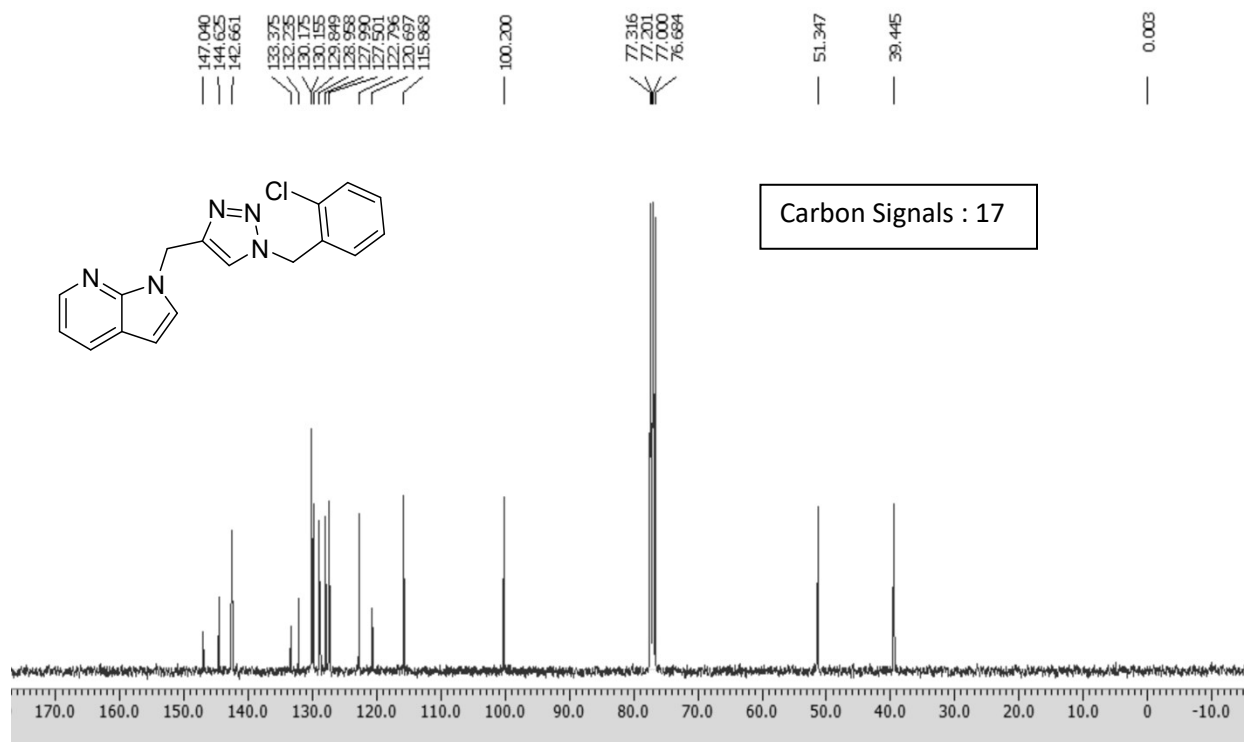Figure SI-14.  $^{13}\text{C-NMR}$  (4c)

Sample Name : KS\_08  
Test Name :  
010622\_KS\_08 22 (0.389)

IITRPR

XEVO G2-XS QTOF

1: TOF MS ES+  
2.39e8

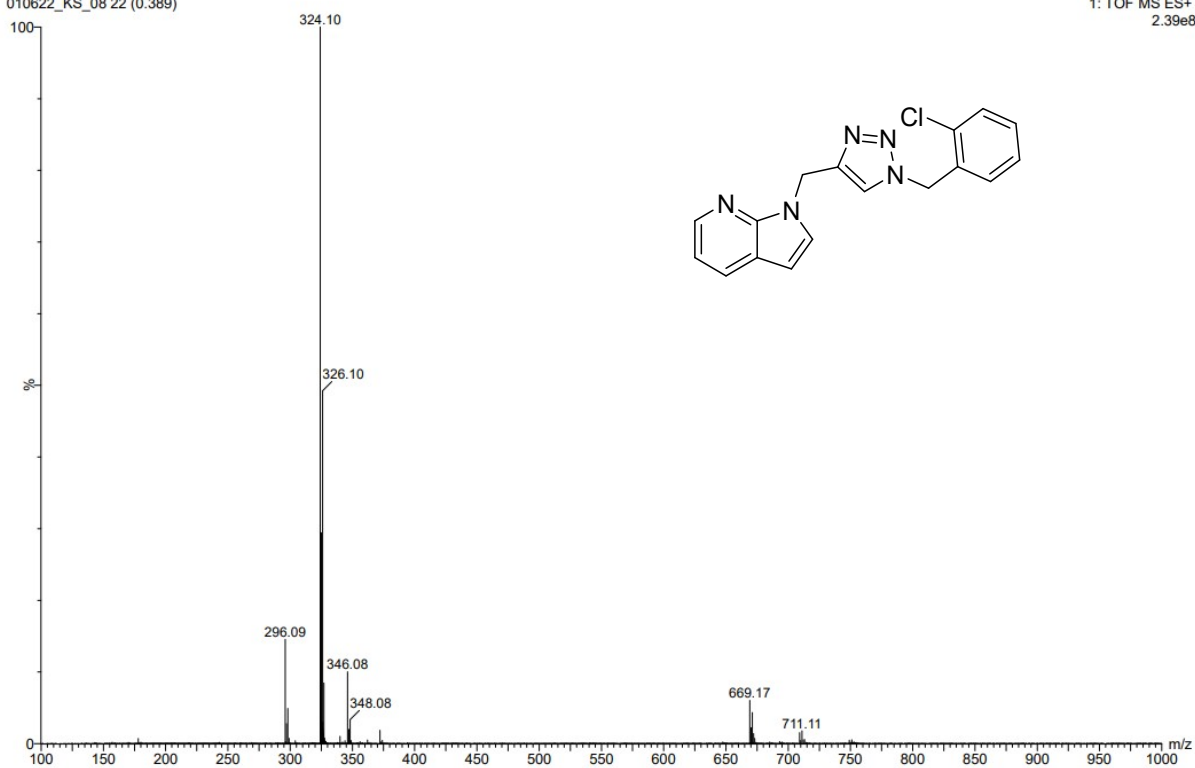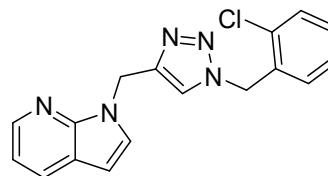

Figure SI-15. ESI-MS  $[M+H]^+$  : m/z for (**4c**)  $C_{17}H_{14}N_5Cl$  : 324.10

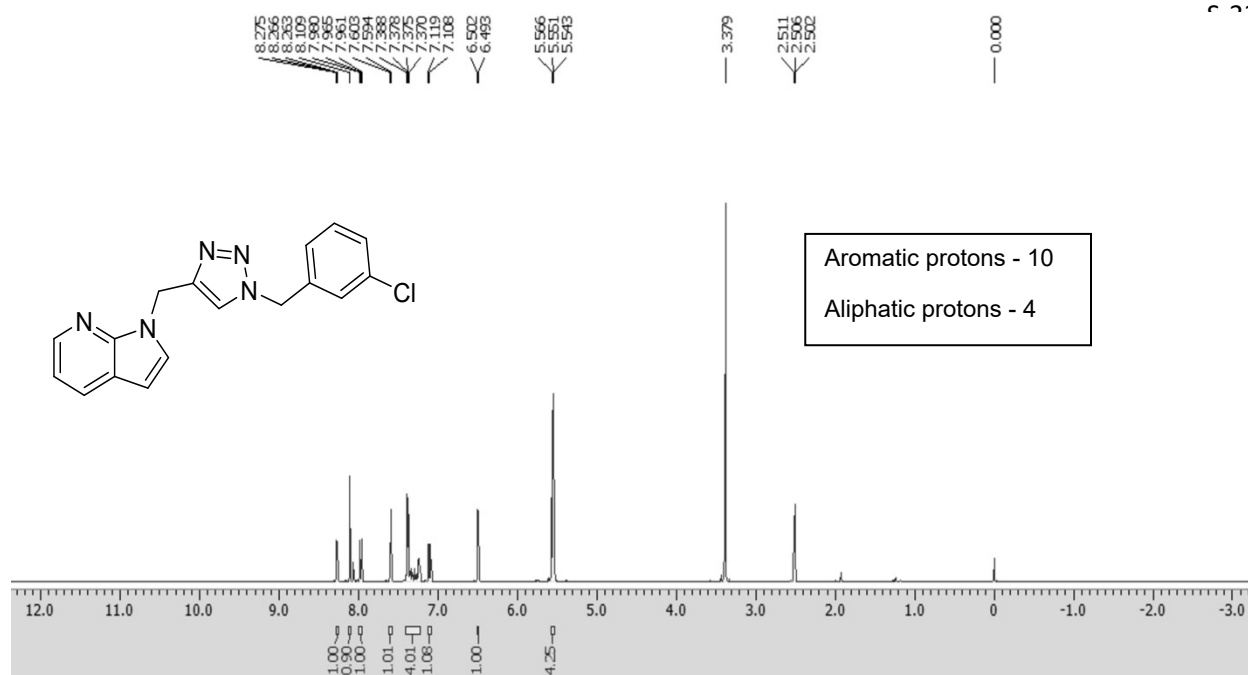

**Figure SI-16. <sup>1</sup>H-NMR (4d)**

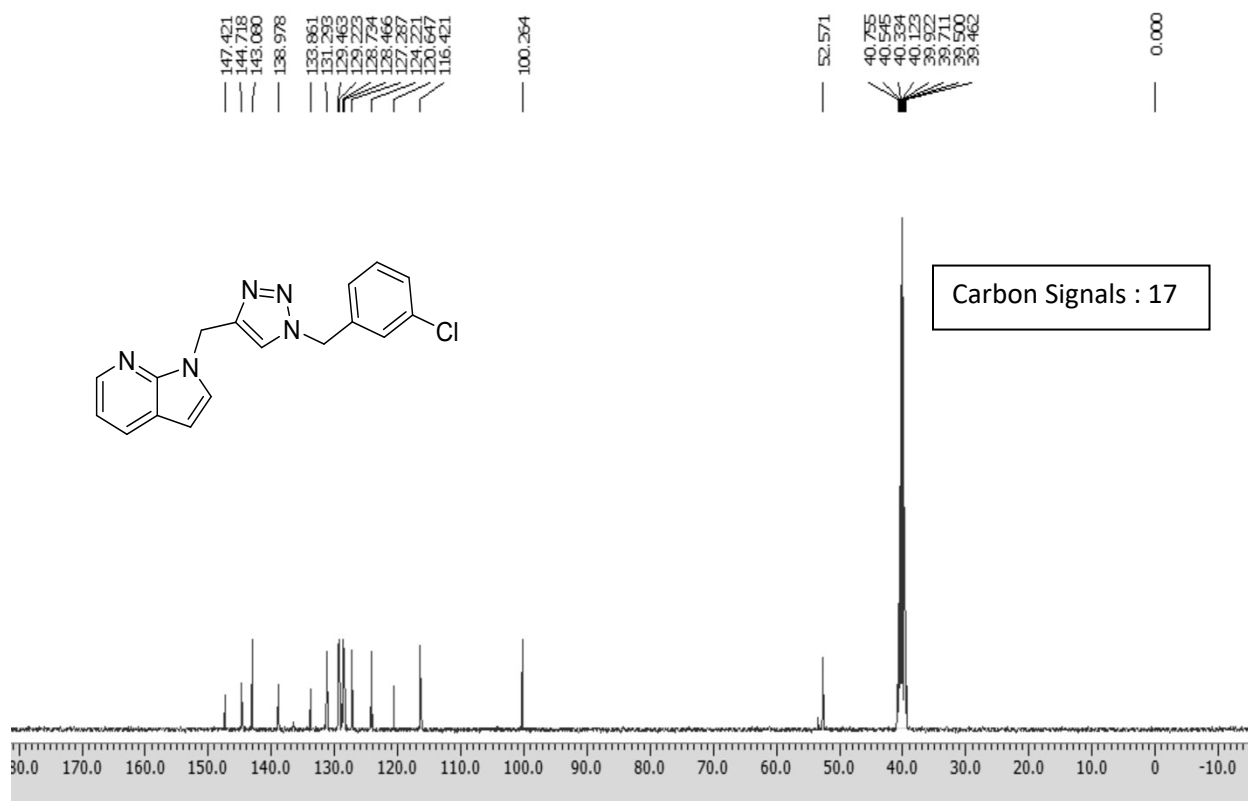

**Figure SI-17. <sup>13</sup>C-NMR (4d)**



Sample Name : KS\_09  
Test Name :  
010622\_KS\_09 28 (0.490)

IITRPR

XEVO G2-XS QTOF

1: TOF MS ES+  
1.40e8

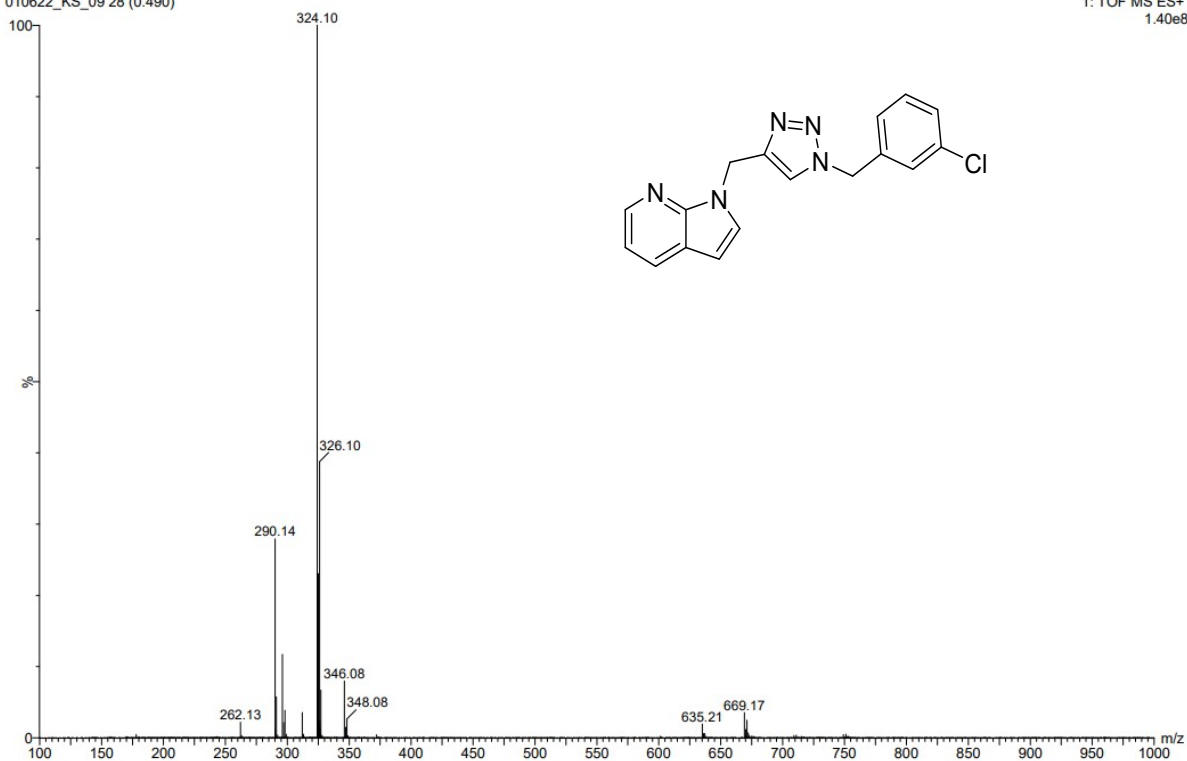

**Figure SI-18.** ESI-MS  $[M+H]^+$ : m/z for (**4d**)  $C_{17}H_{14}N_5Cl$  : 324.10

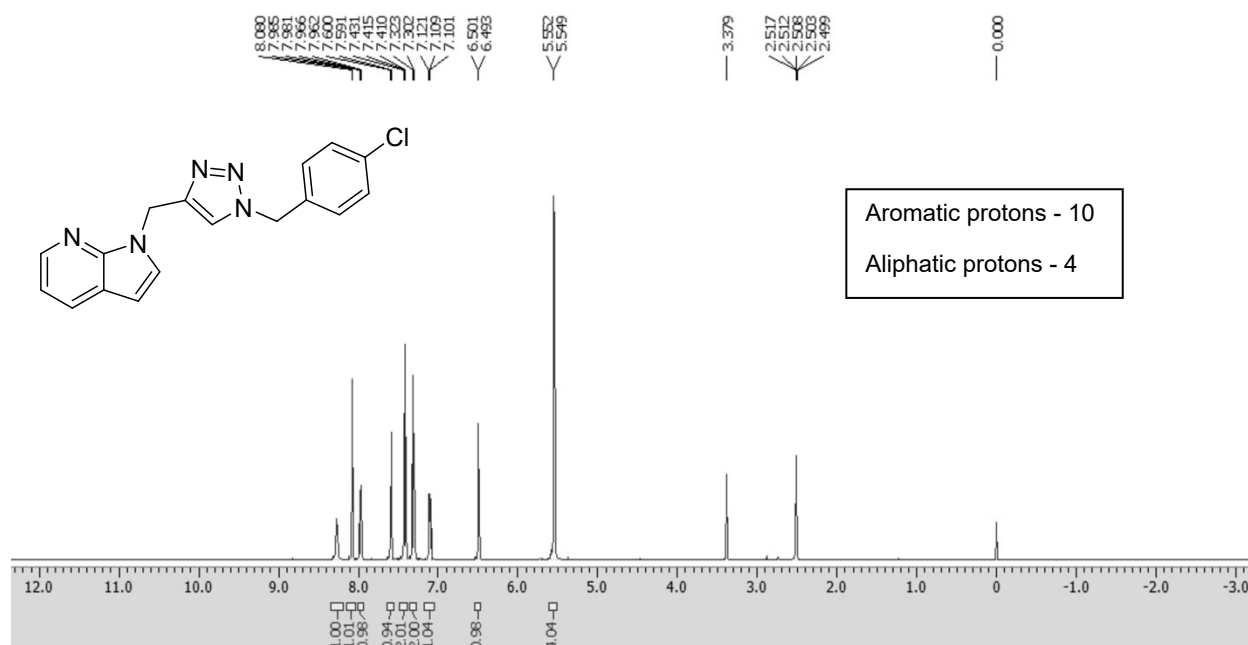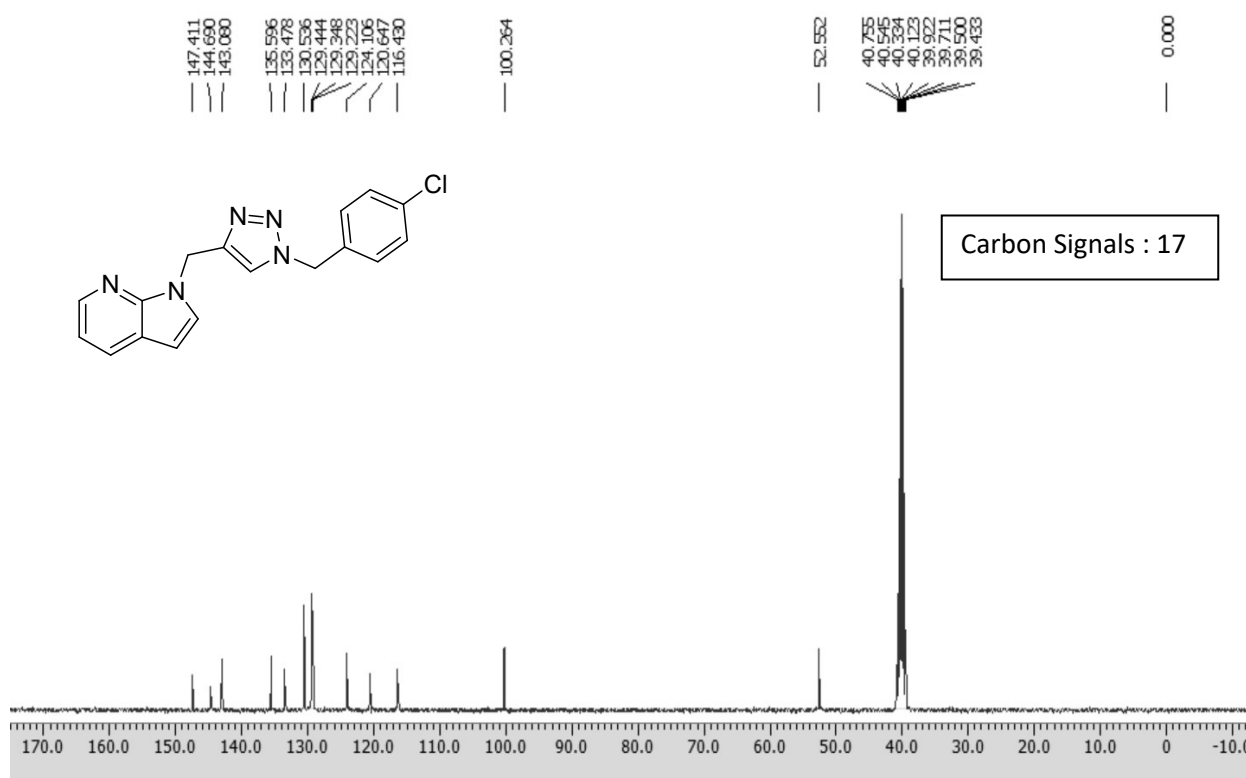

Sample Name : KS\_04  
Test Name :  
010622\_KS\_04 20 (0.355)

IITRPR

XEVO G2-XS QTOF

1: TOF MS ES+  
1.18e8

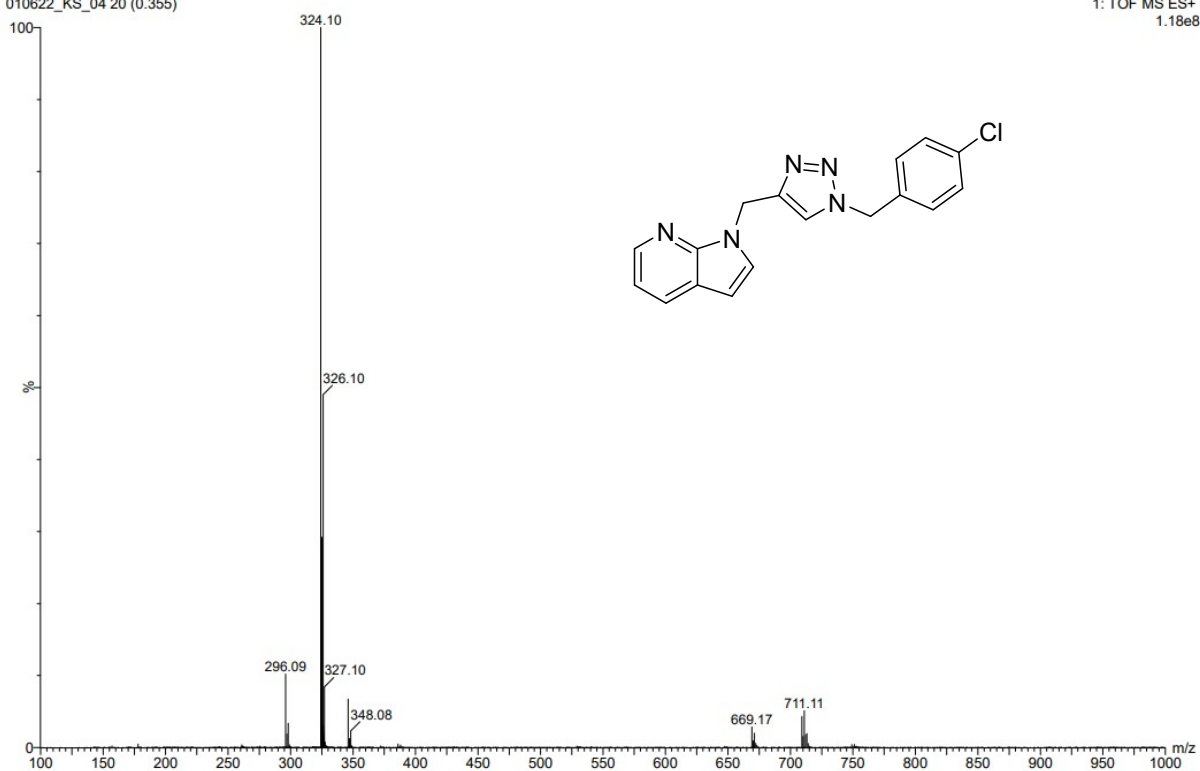

Figure SI-21. ESI-MS  $[M+H]^+$  : m/z for (4e)  $C_{17}H_{14}N_5Cl$  : 324.10

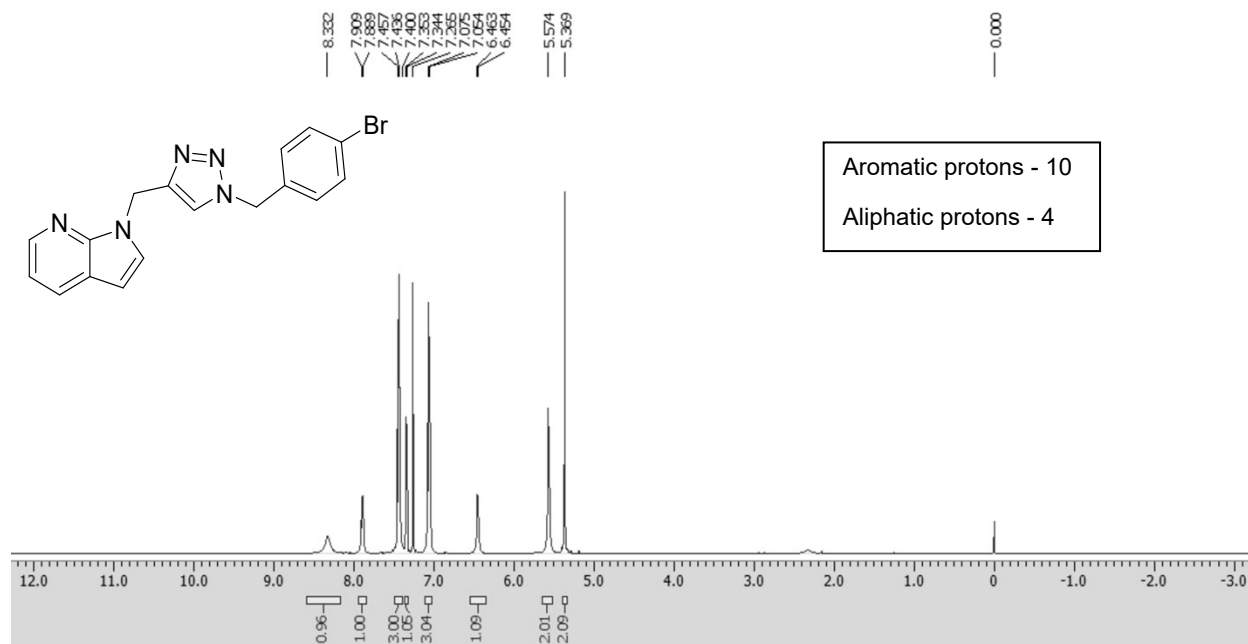Figure SI-22. <sup>1</sup>H-NMR (4f)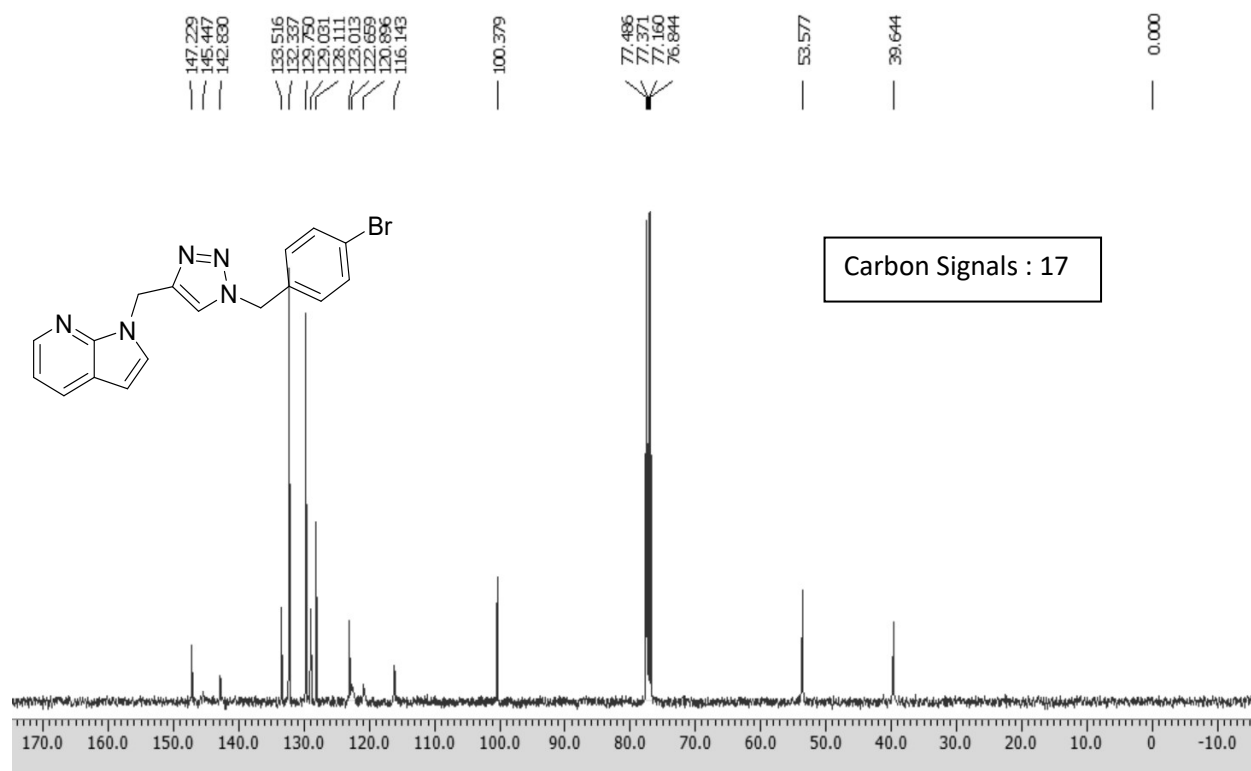Figure SI-23. <sup>13</sup>C-NMR (4f)

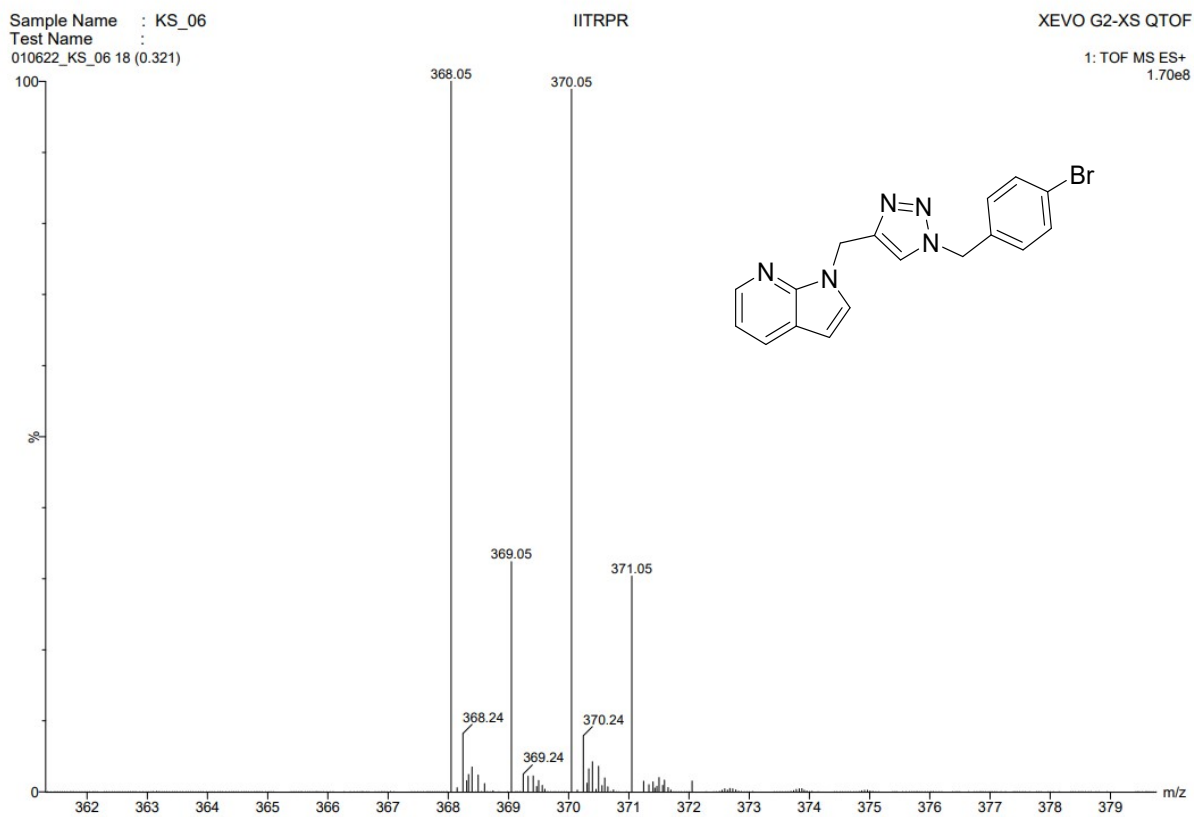

**Figure SI-24.** ESI-MS  $[M+H]^+$ : m/z for (**4f**)  $C_{17}H_{14}N_5Br$ : 368.05

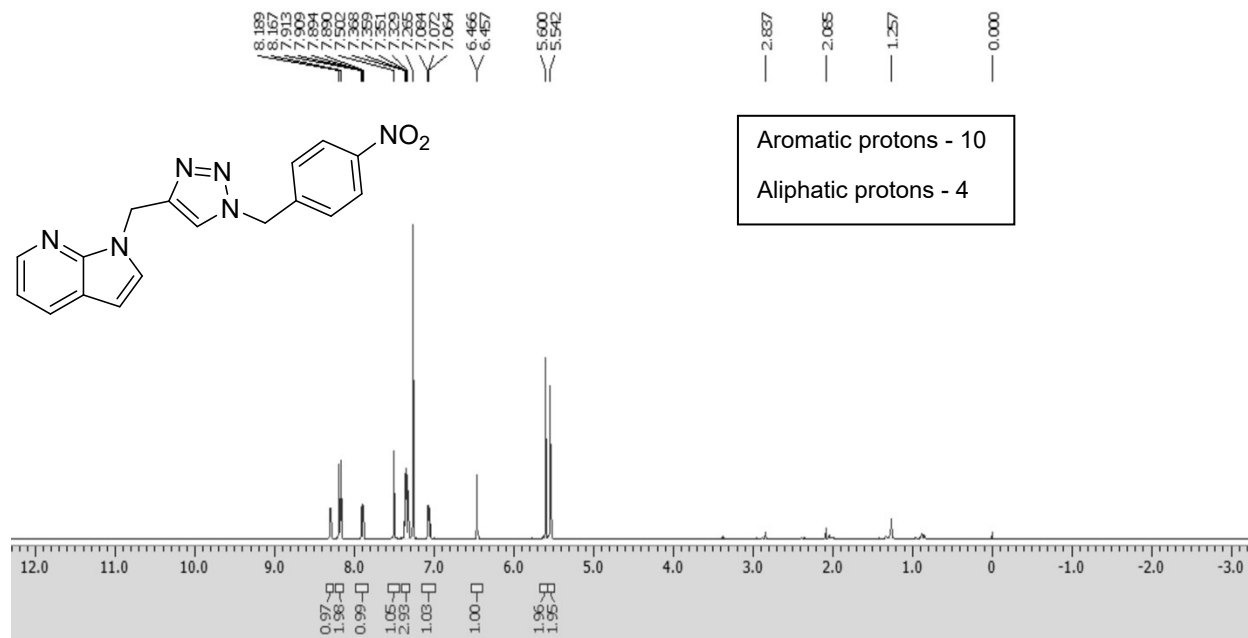

**Figure SI-25. <sup>1</sup>H-NMR (4g)**

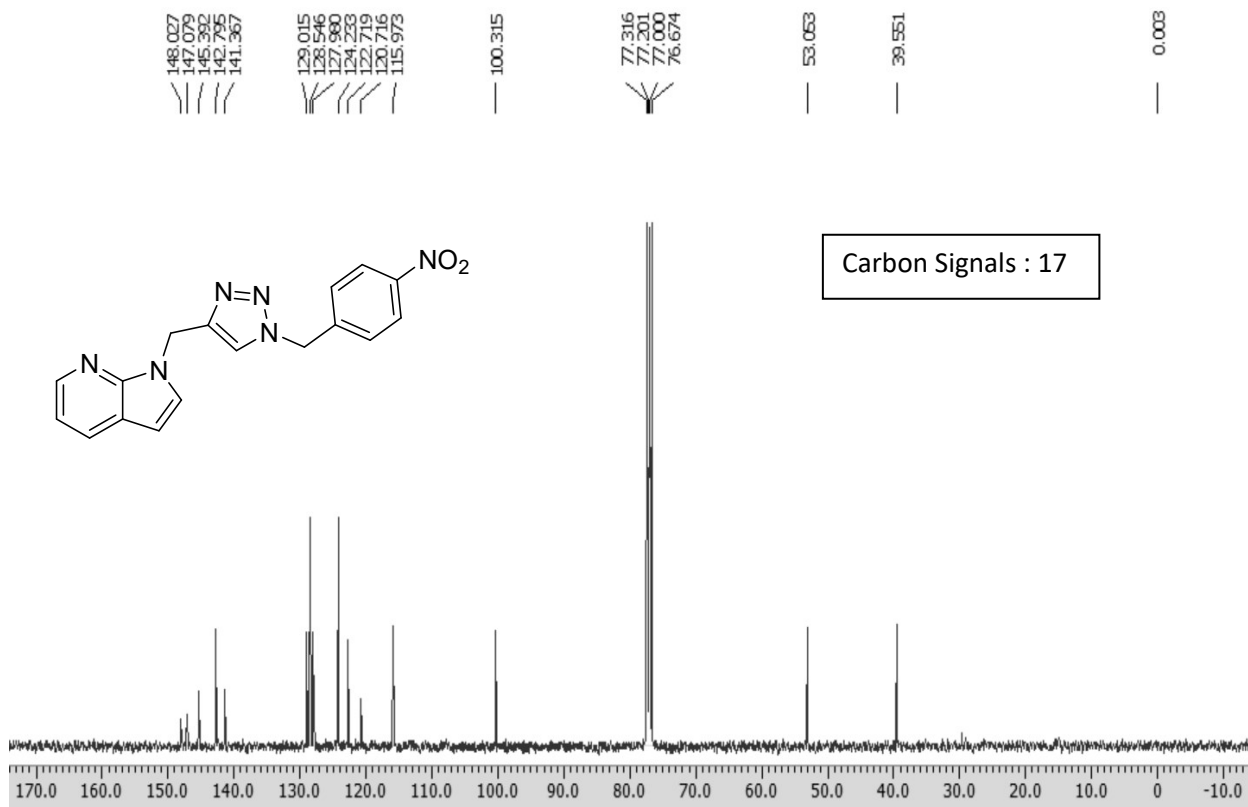

**Figure SI-26. <sup>13</sup>C-NMR (4g)**

Sample Name : KS\_03  
Test Name :  
010622\_KS\_03 15 (0.270)

IITRPR

XEVO G2-XS QTOF

1: TOF MS ES+  
3.36e7

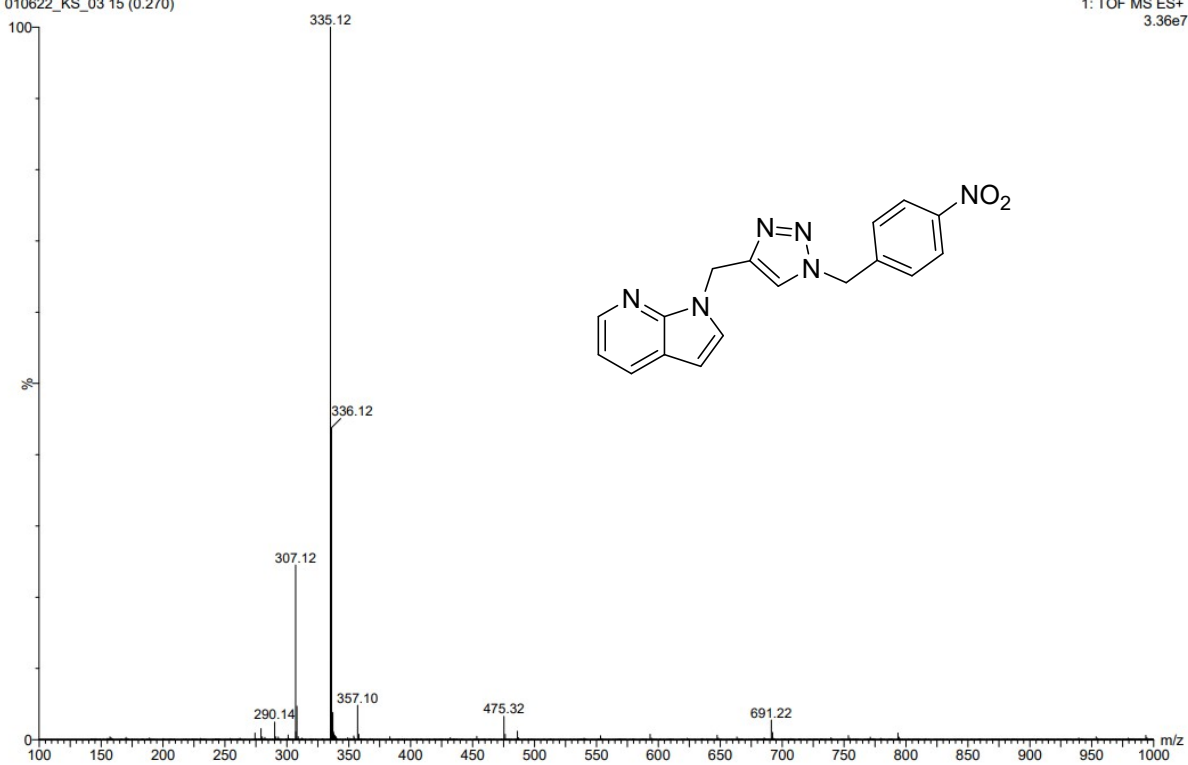

Figure SI-27. ESI-MS  $[M+H]^+$  :  $m/z$  for (**4g**)  $C_{17}H_{14}N_6O_2$  : 335.12

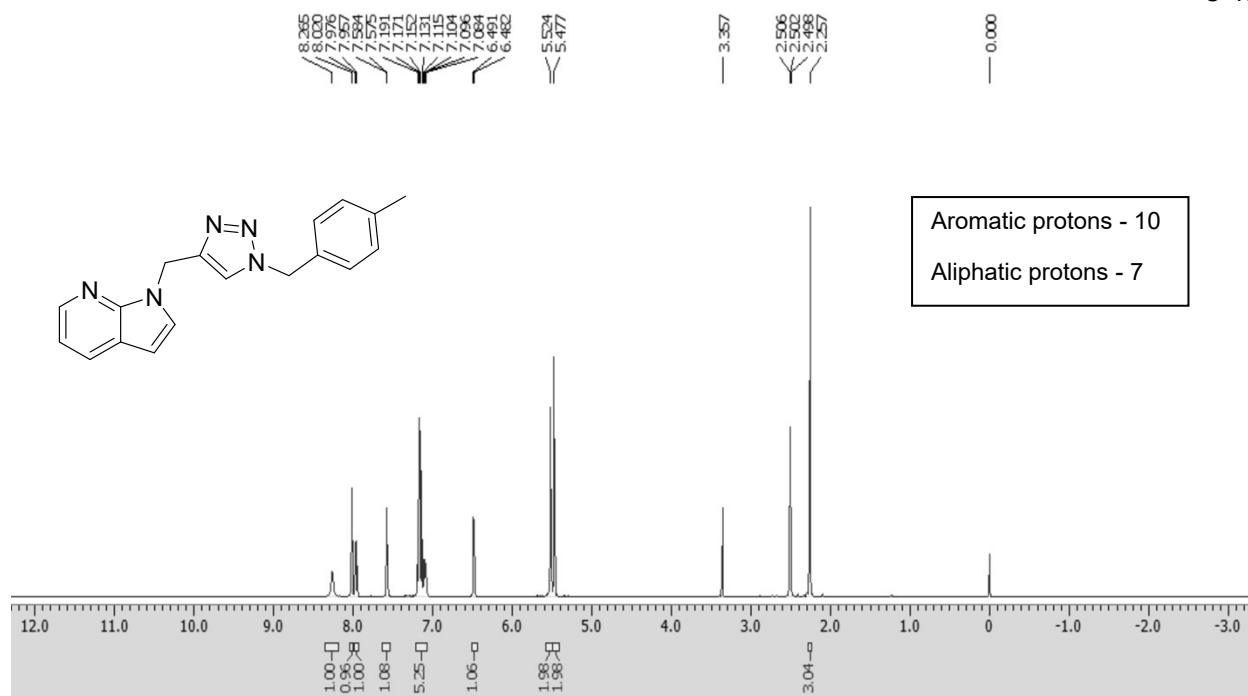

**Figure SI-28. <sup>1</sup>H-NMR (4h)**

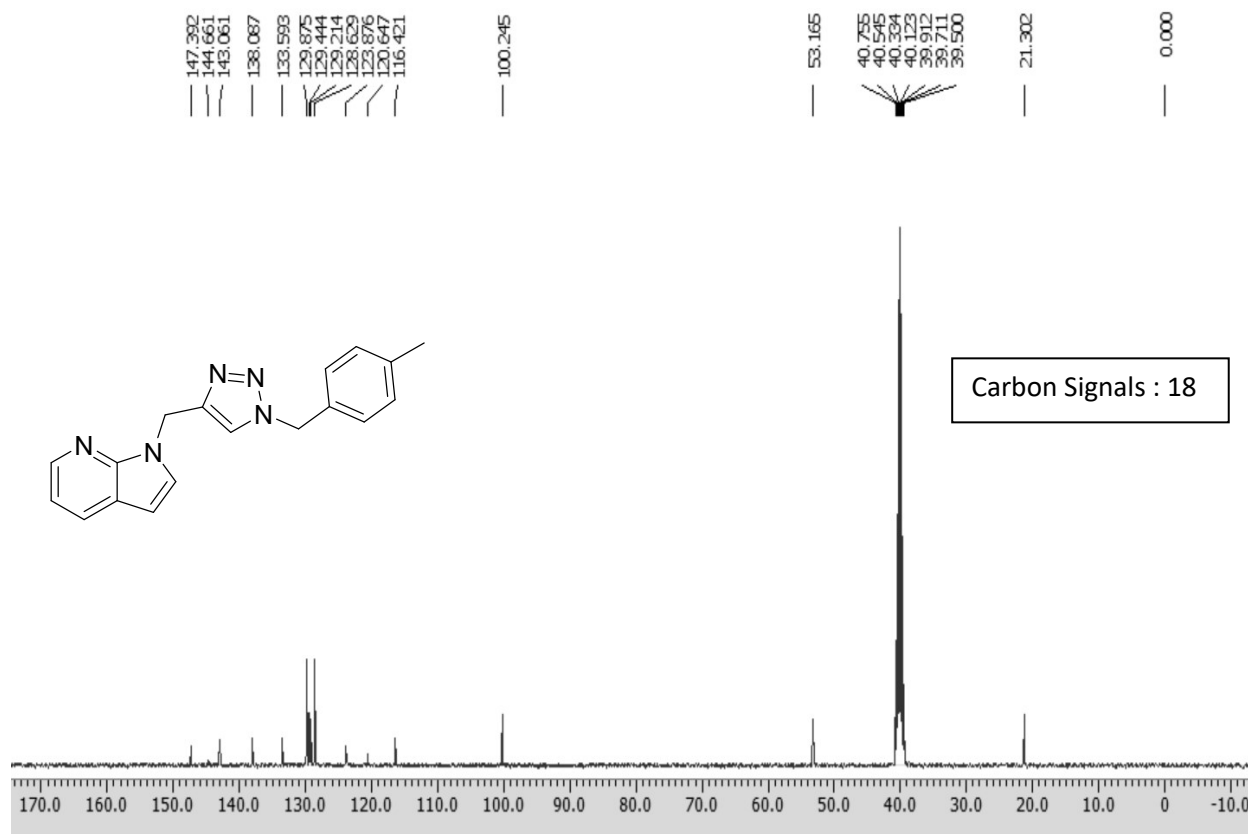

**Figure SI-29. <sup>13</sup>C-NMR (4h)**



Sample Name : KS\_07  
Test Name :  
010622\_KS\_07 27 (0.473)

IITRPR

XEVO G2-XS QTOF

1: TOF MS ES+  
1.37e8

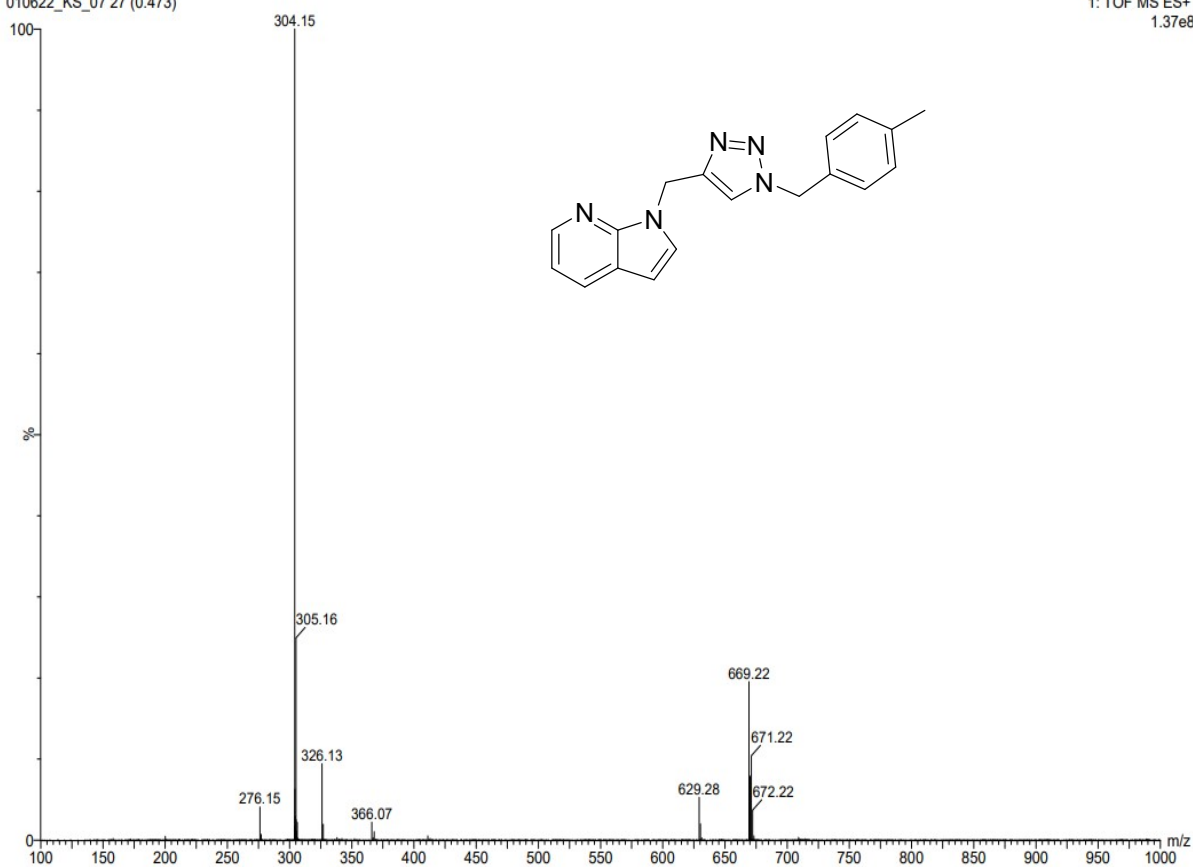

Figure SI-30. ESI-MS  $[M+H]^+$  : m/z for (4h)  $C_{18}H_{17}N_5$  : 304.15

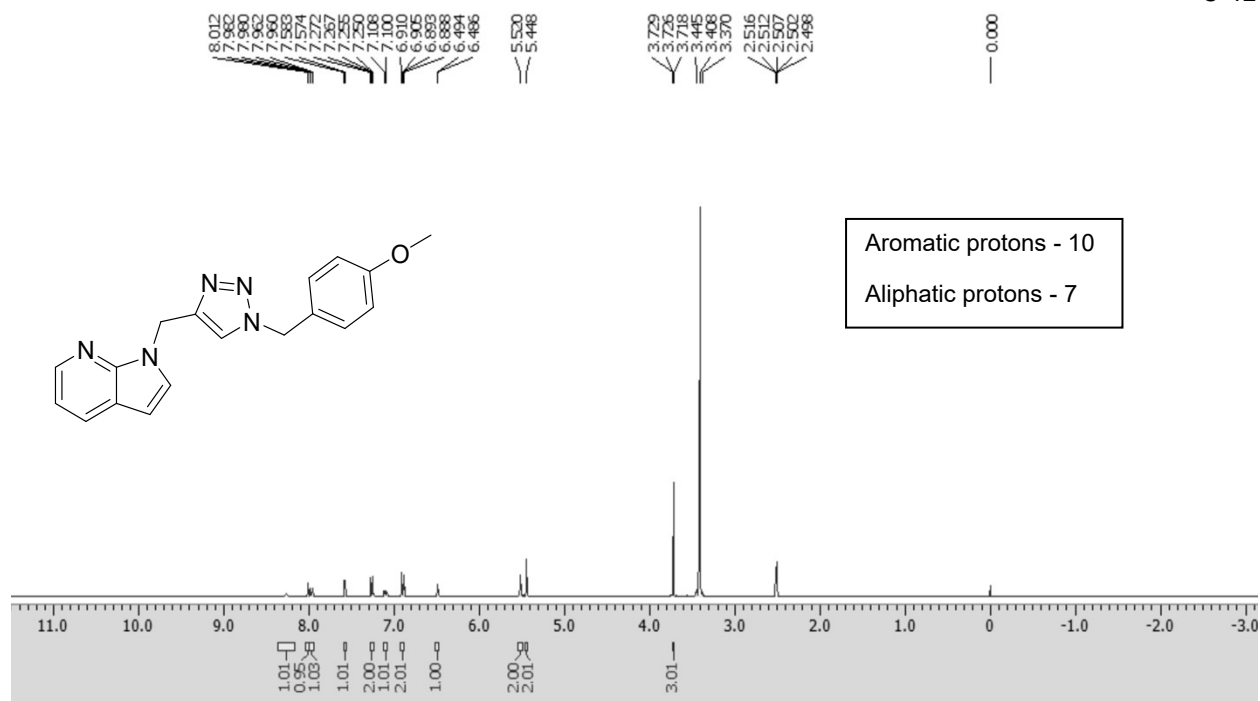Figure SI-31. <sup>1</sup>H-NMR (4i)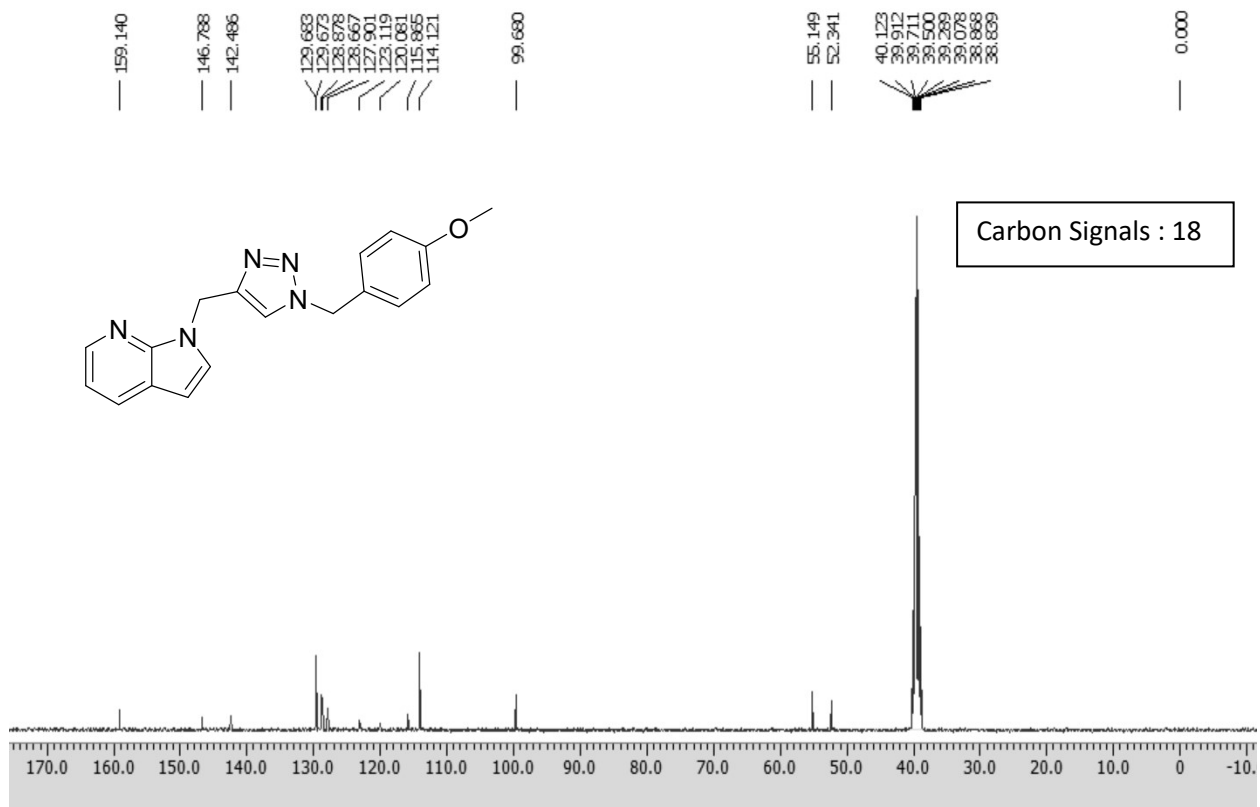Figure SI-32. <sup>13</sup>C-NMR (4i)

Sample Name : KS\_10  
Test Name :  
010622\_KS\_10 22 (0.389)

IITRPR

XEVO G2-XS QTOF

1: TOF MS ES+  
1.58e8

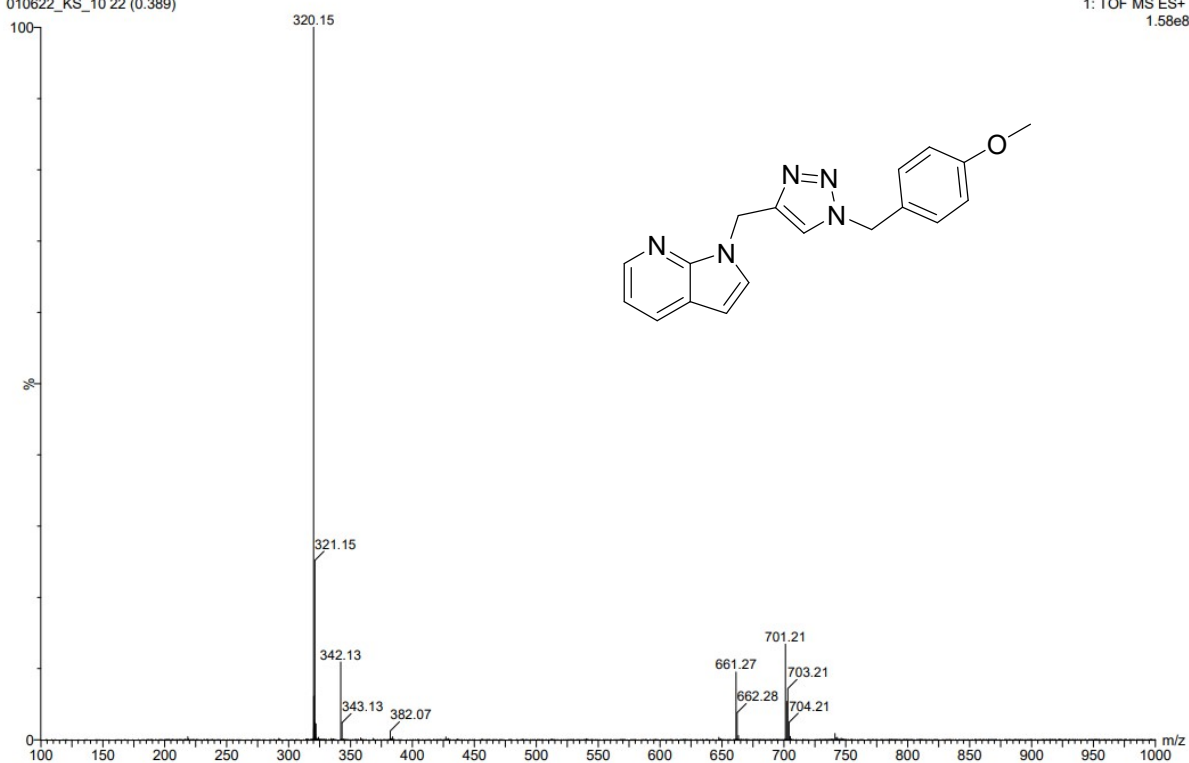

**Figure SI-33.** ESI-MS  $[M+H]^+$  : m/z for (4i)  $C_{18}H_{17}N_5O$  : 320.15

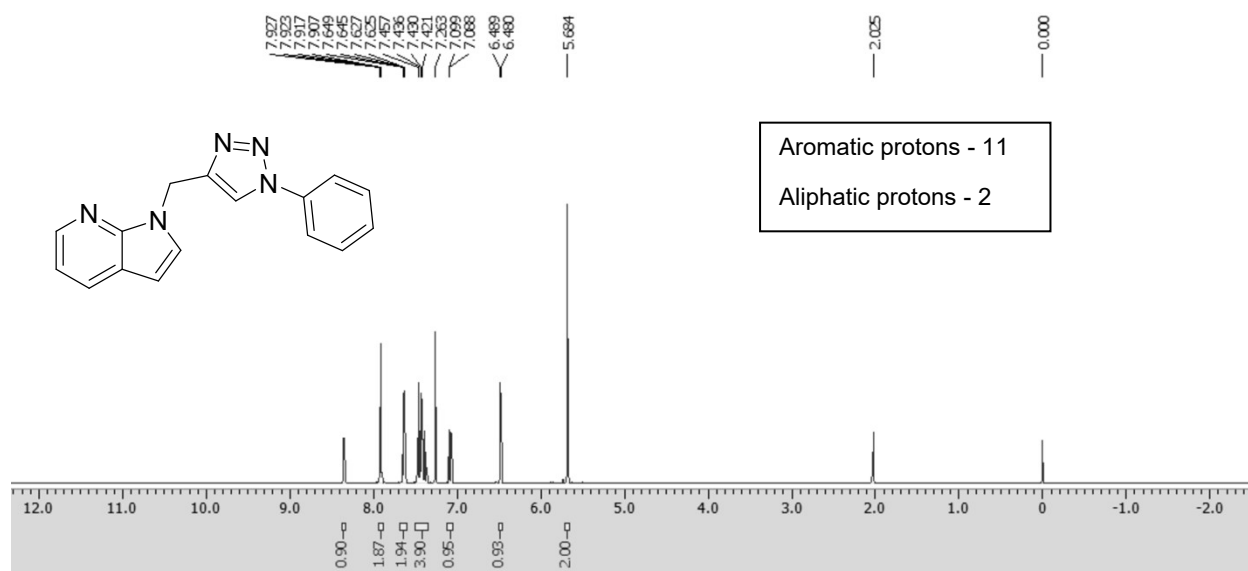

**Figure SI-34. <sup>1</sup>H-NMR (4j)**

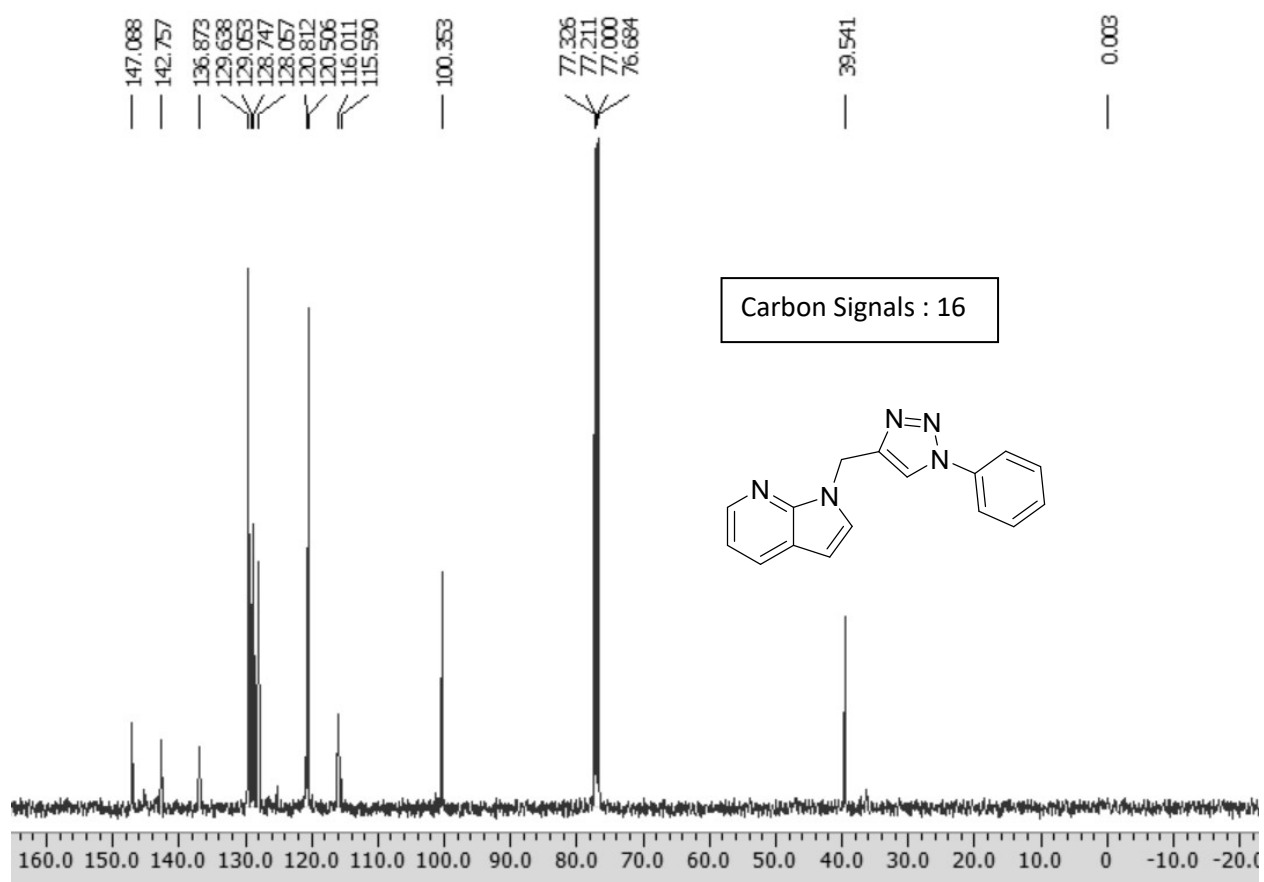

**Figure SI-35. <sup>13</sup>C-NMR (4j)**

Sample Name : KS\_12  
Test Name :  
010622\_KS\_12\_14 (0.254)

IITRPR

XEVO G2-XS QTOF

1: TOF MS ES+  
5.03e7

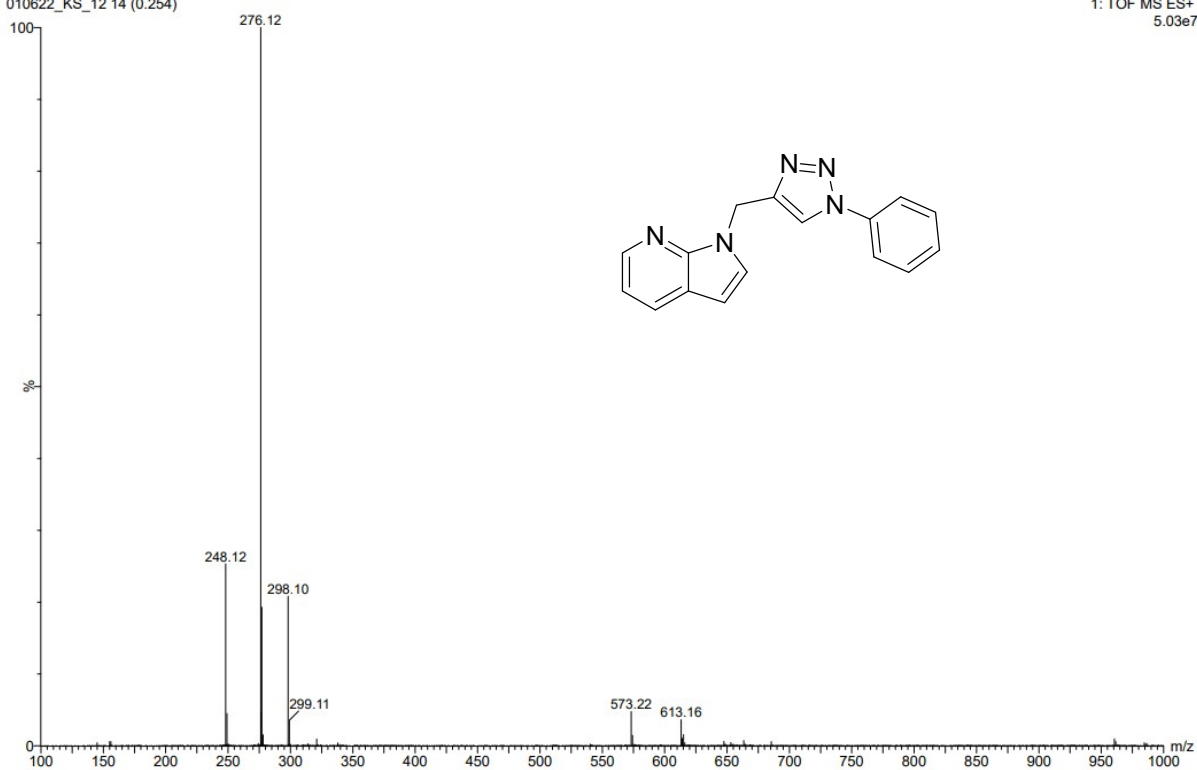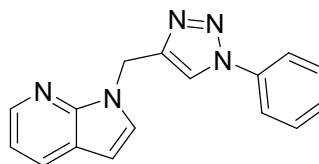

Figure SI-36. ESI-MS  $[M+H]^+$  : m/z for (4j)  $C_{16}H_{13}N_5$  : 276.12

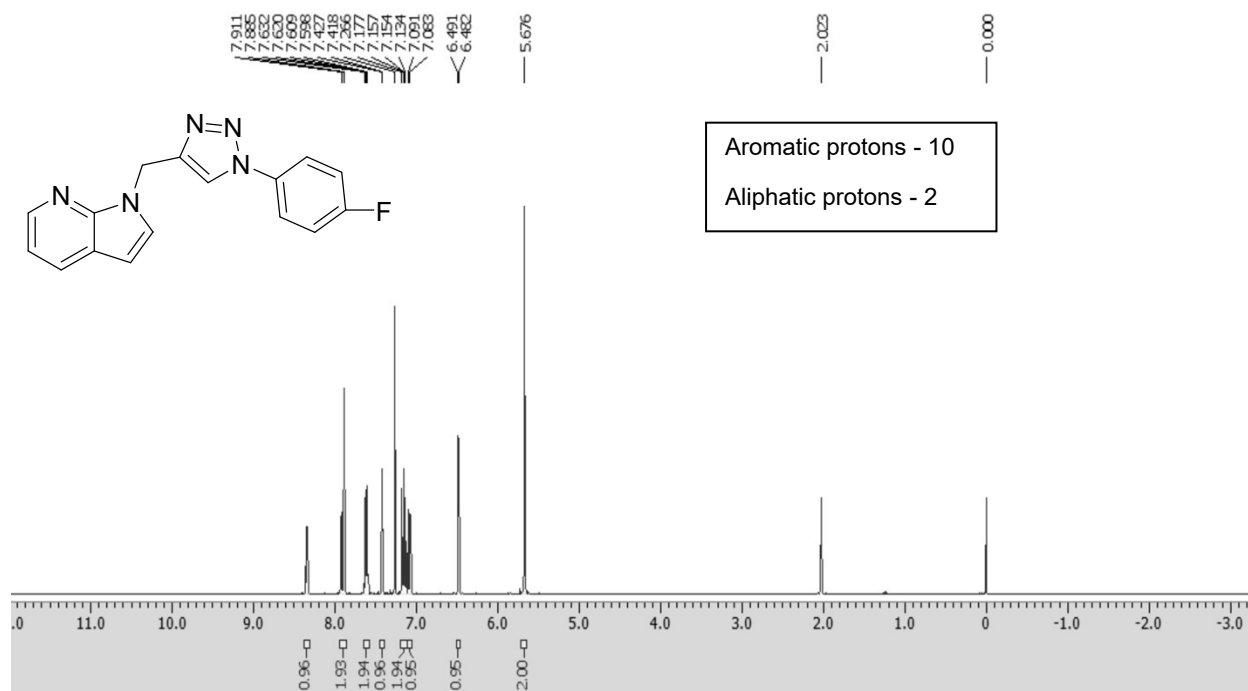Figure SI-37. <sup>1</sup>H-NMR (4k)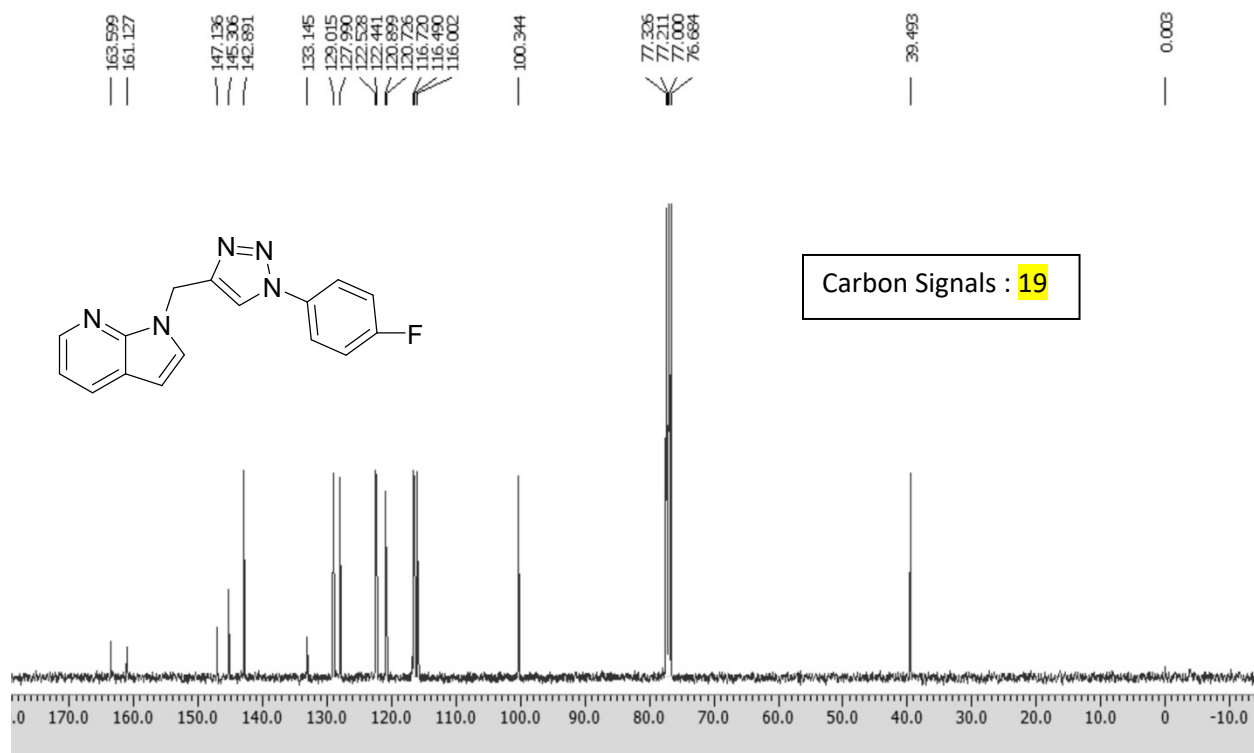Figure SI-38. <sup>13</sup>C-NMR (4k)

Sample Name : KS\_18  
Test Name :  
200722\_KS\_18 37 (0.643)

IITRPR

XEVO G2-XS QTOF

1: TOF MS ES+  
2.50e7

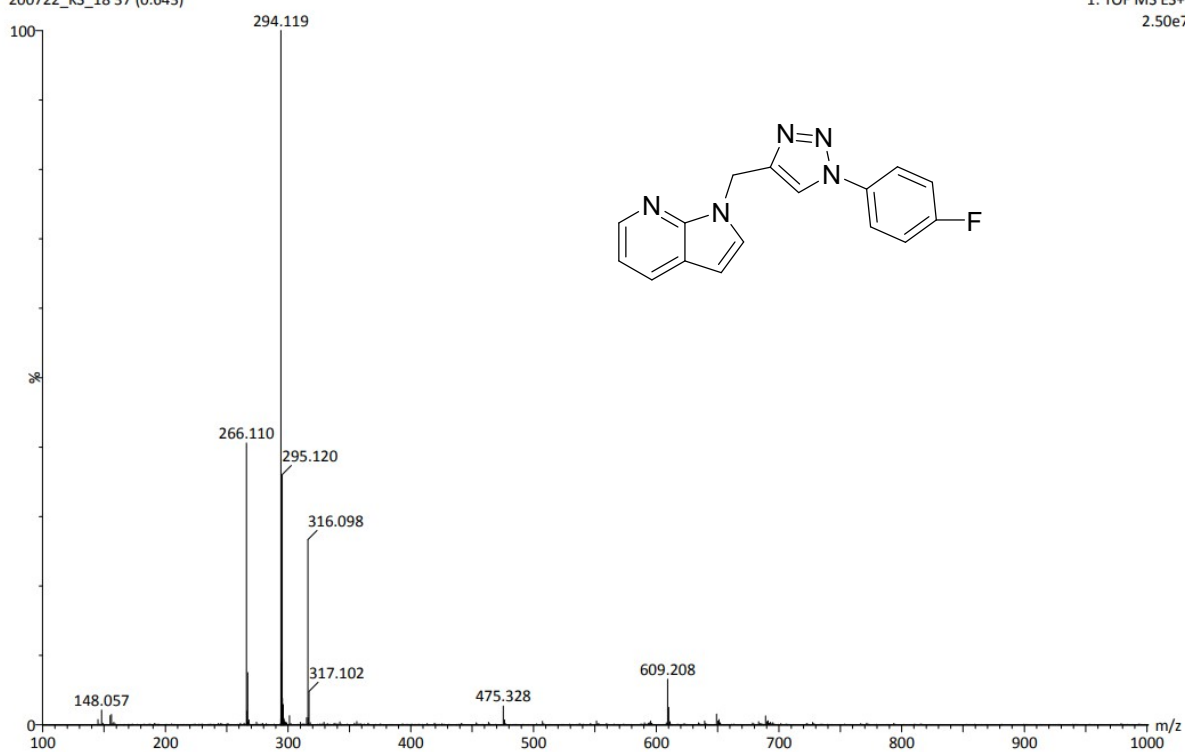

Figure SI-39. ESI-MS  $[M+H]^+$  : m/z for (4k)  $C_{16}H_{12}N_5F$  : 294.119

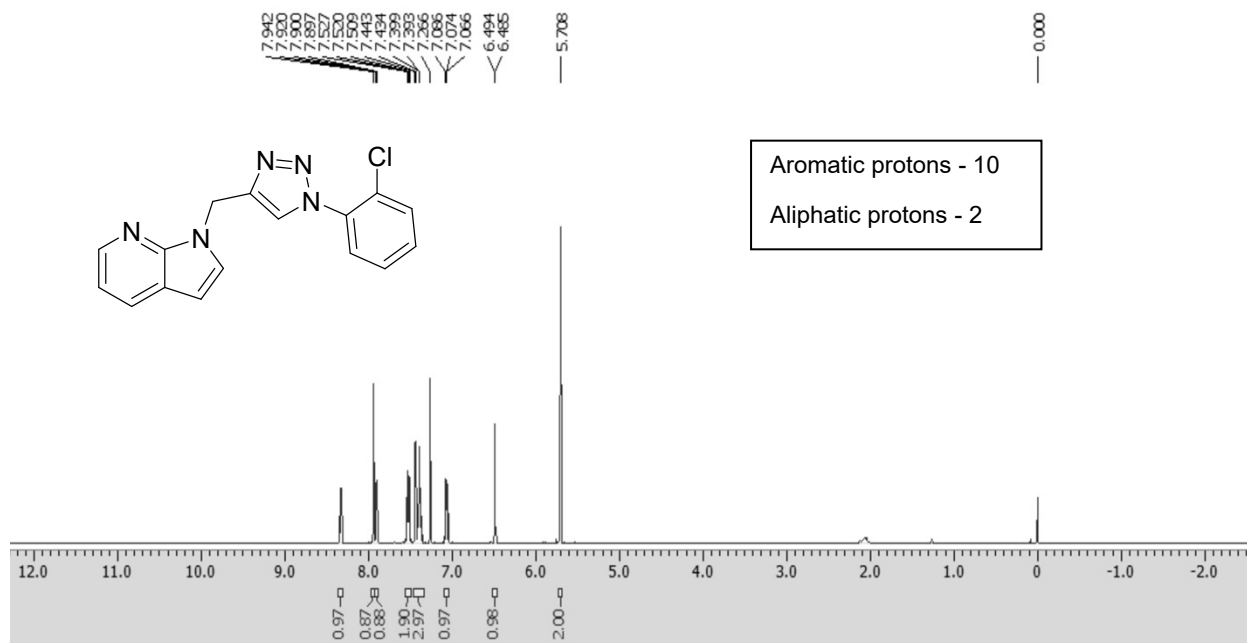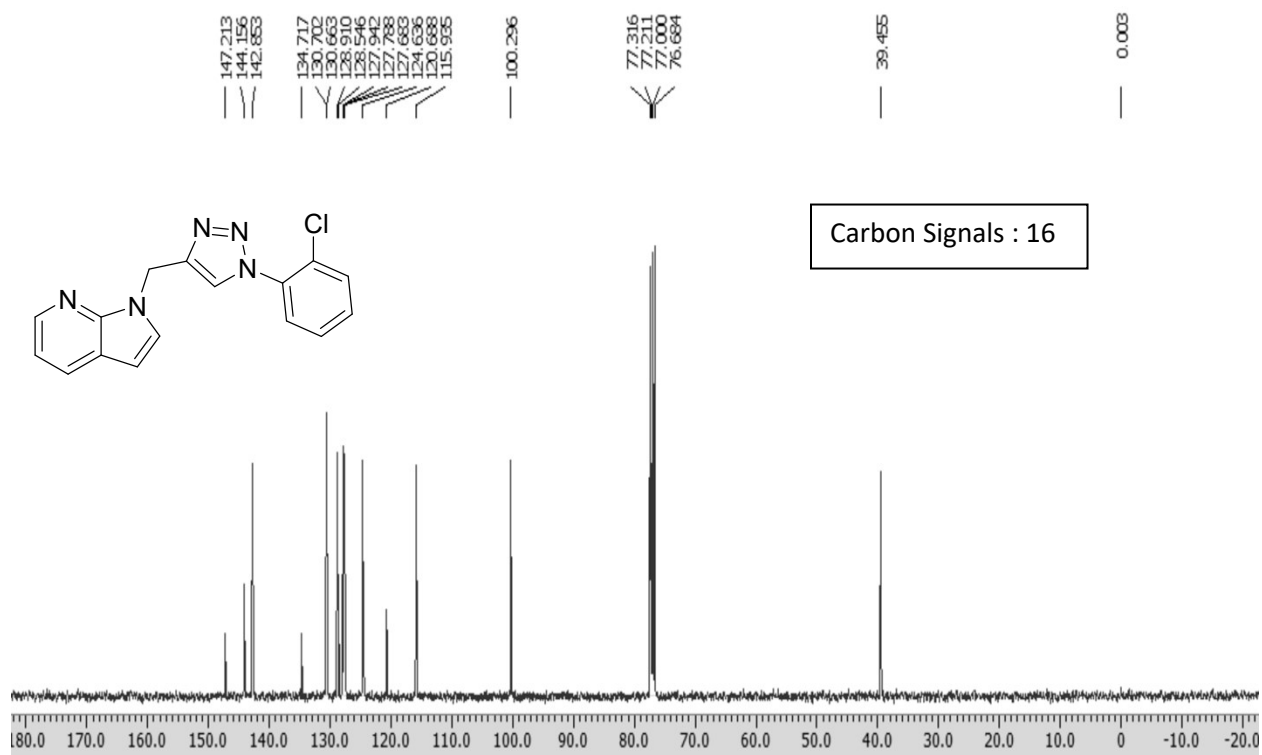



Sample Name : KS\_15  
Test Name :  
200722\_KS\_15\_23 (0.406)

HTRPR

XEVO G2-XS QTOF

1: TOF MS ES+  
1.95e7

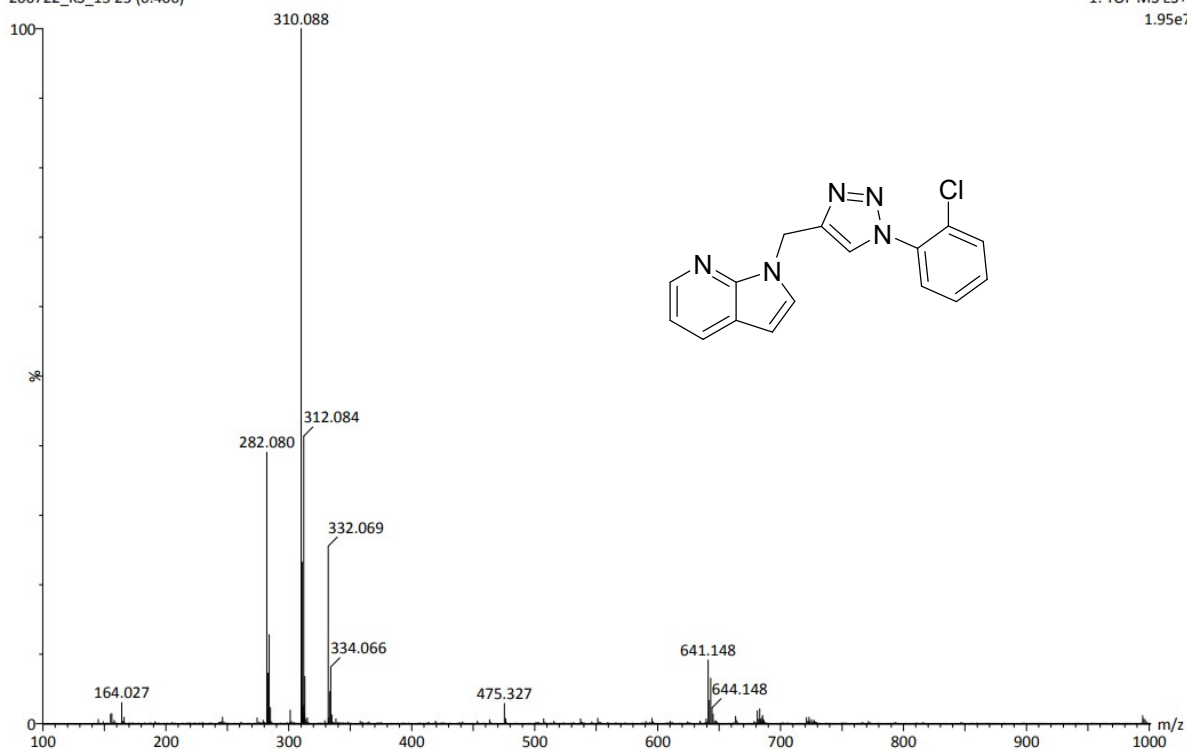

Figure SI-42. ESI-MS  $[M+H]^+$  : m/z for (4)  $C_{16}H_{12}ClN_5$  : 310.08

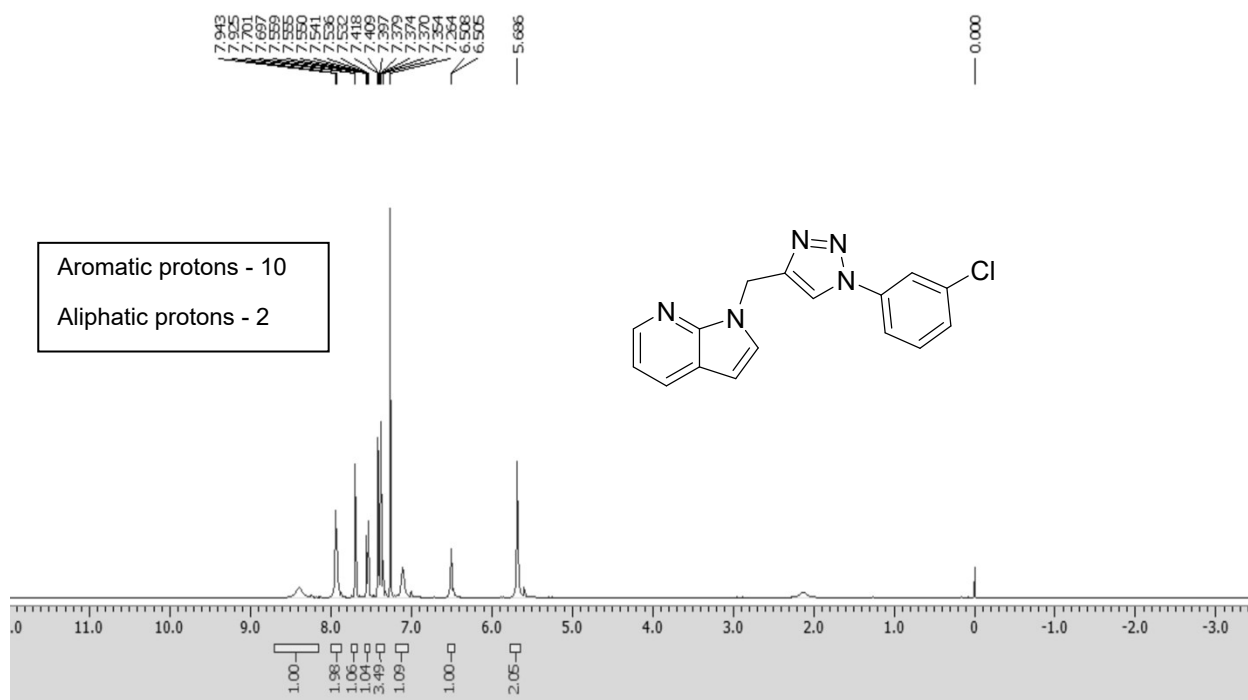Figure SI-43. <sup>1</sup>H-NMR (4m)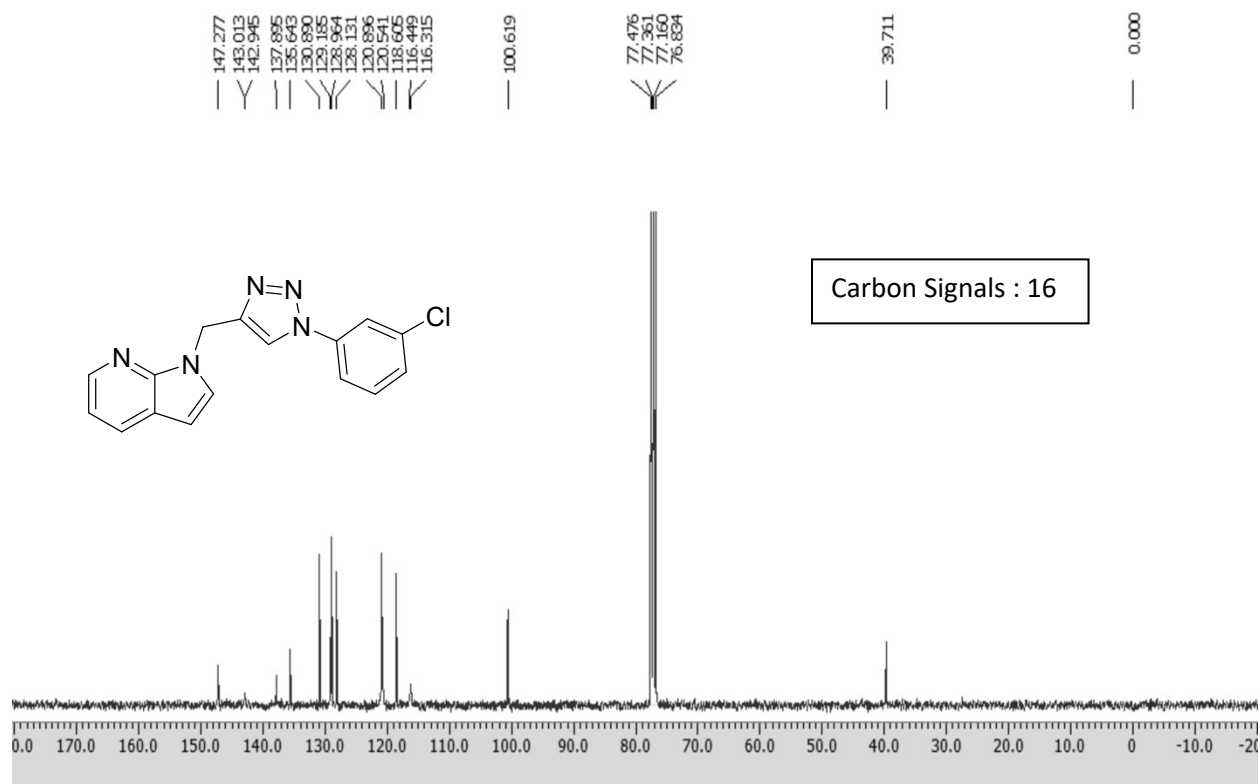Figure SI-44. <sup>13</sup>C-NMR (4m)

Sample Name : KS\_14  
Test Name :  
200722\_KS\_14 27 (0.473)

IITRPR

XEVO G2-XS QTOF

1: TOF MS ES+  
1.20e7

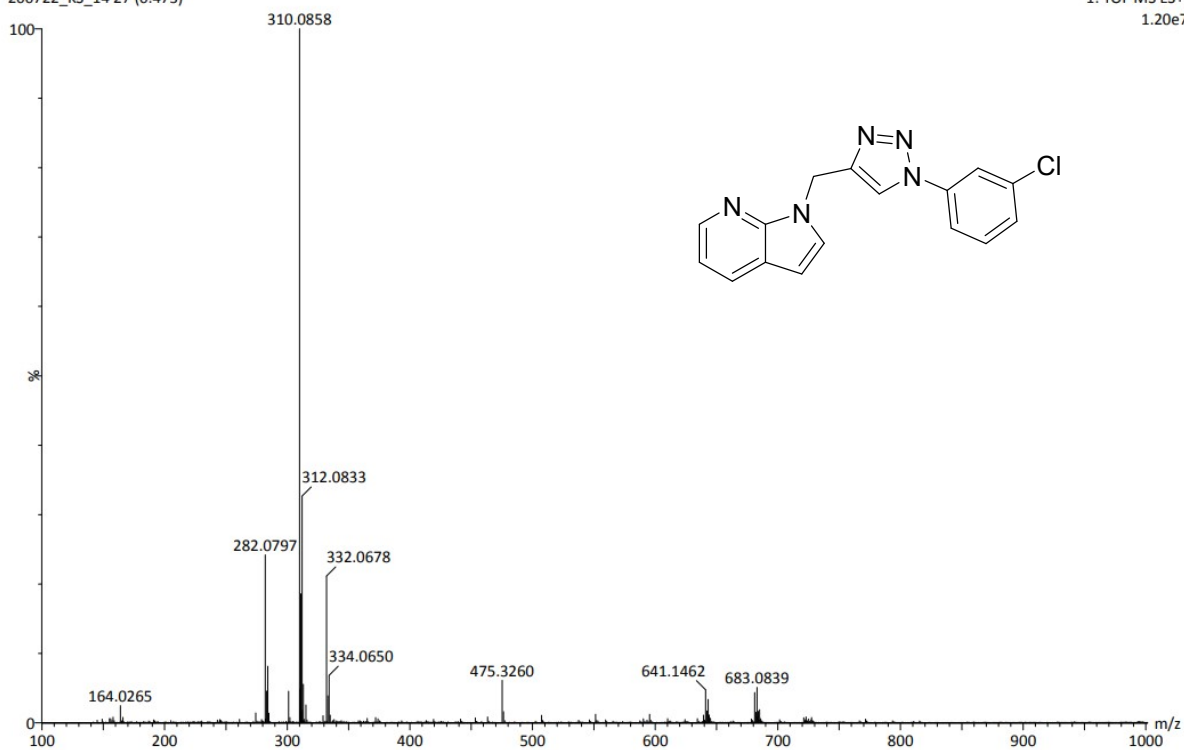

Figure SI-45. ESI-MS  $[M+H]^+$  : m/z for (**4m**)  $C_{16}H_{12}N_5Cl$  : 310.08

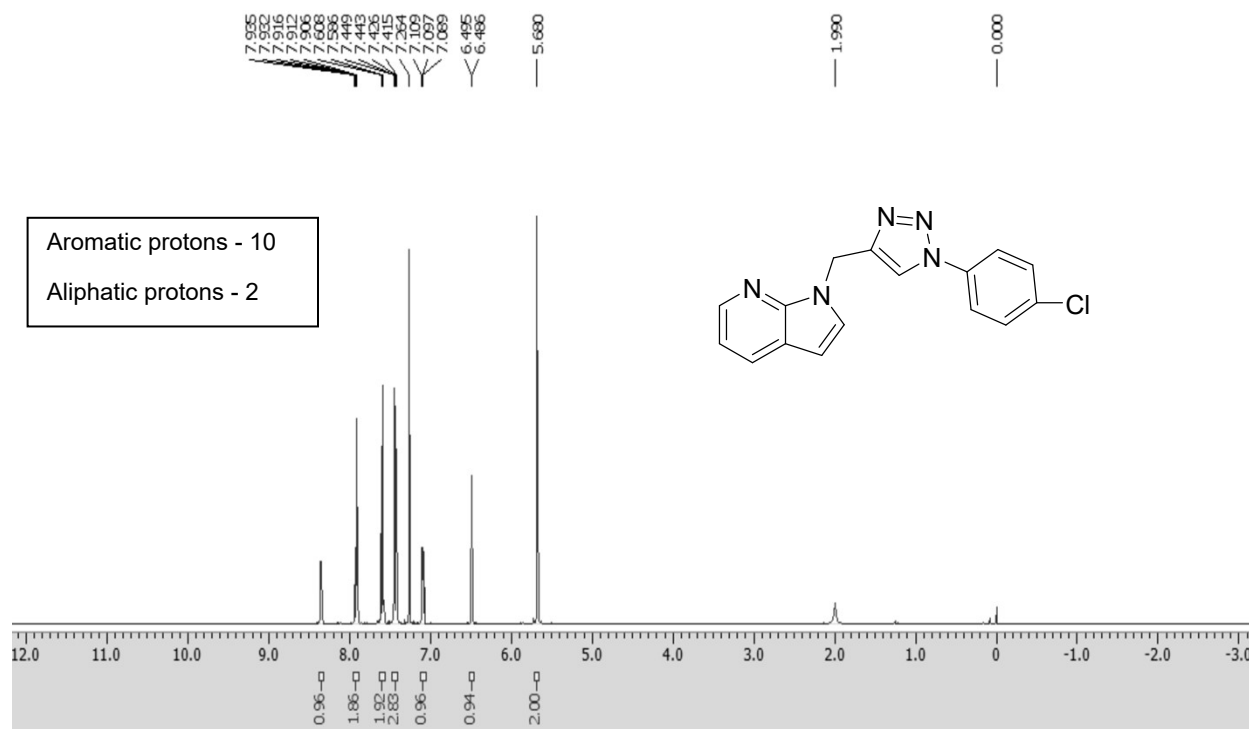Figure SI-46. <sup>1</sup>H-NMR (4n)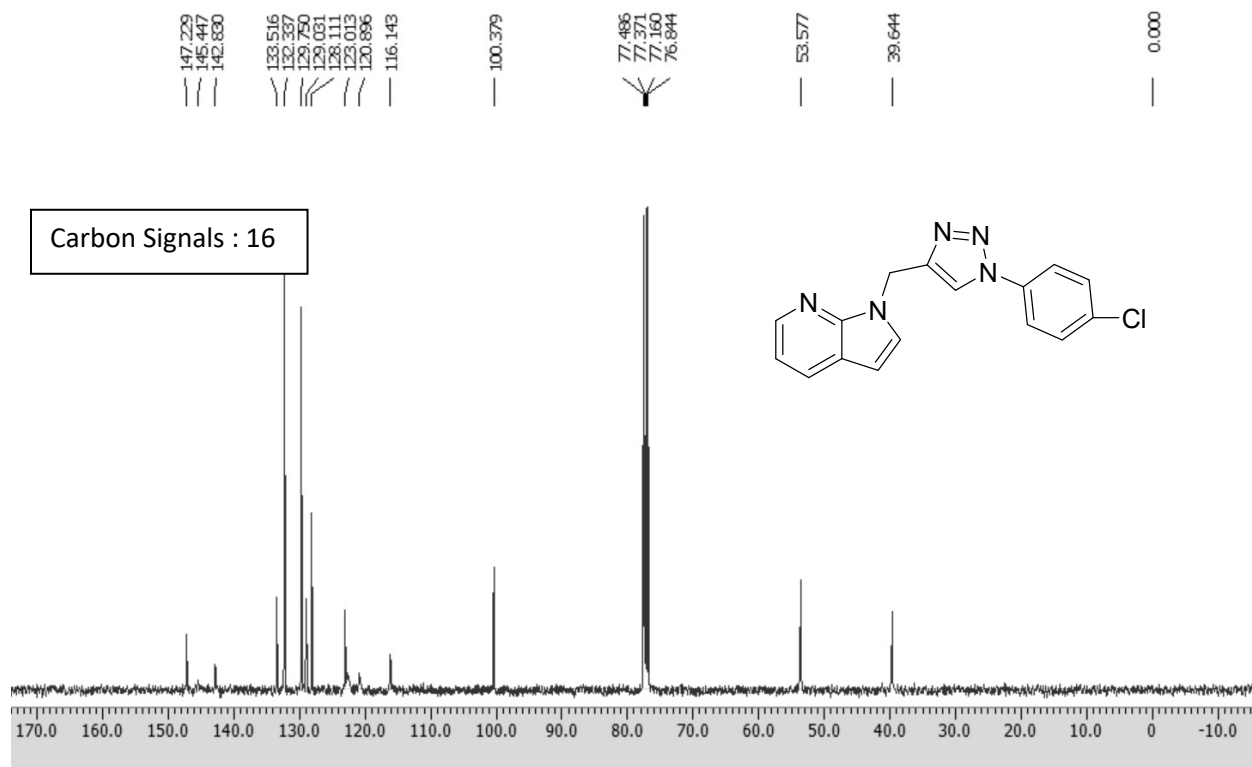Figure SI-47. <sup>13</sup>C-NMR (4n)

Sample Name : KS\_16  
Test Name :  
200722\_KS\_16 17 (0.304)

IITRPR

XEVO G2-XS QTOF

1: TOF MS ES+  
2.42e7

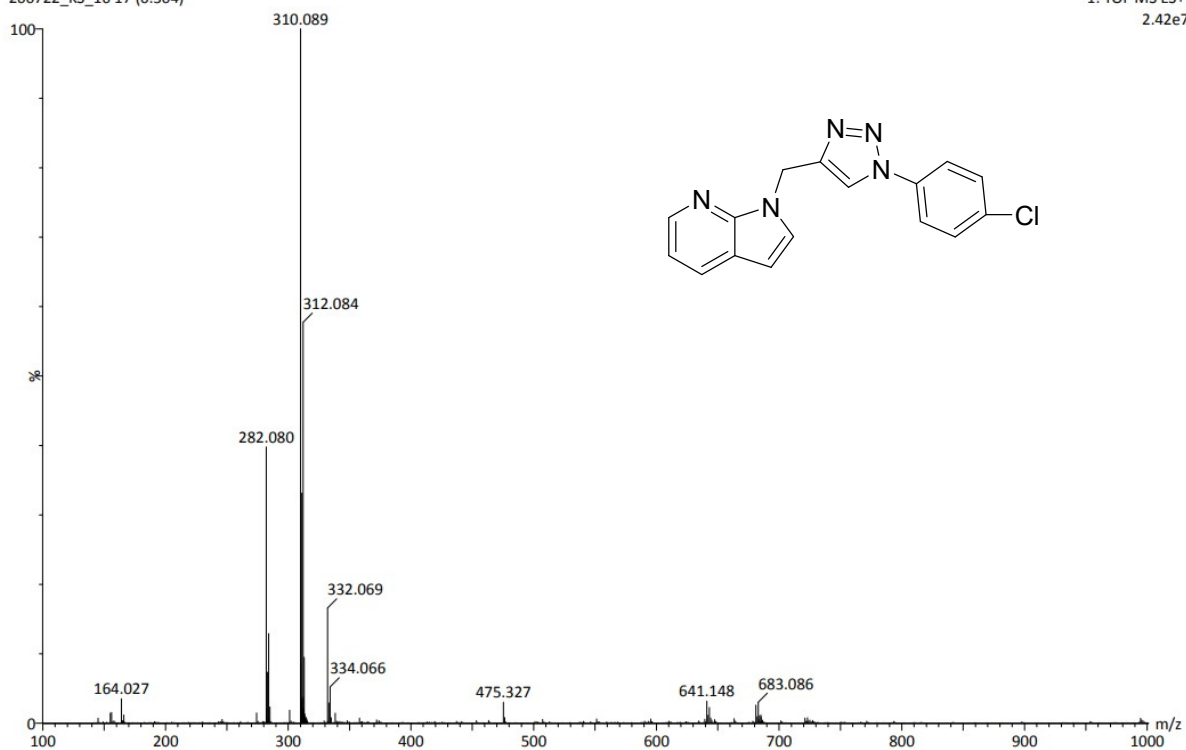

Figure SI-48. ESI-MS  $[M+H]^+$  : m/z for (4n)  $C_{16}H_{12}N_5Cl$  : 310.089

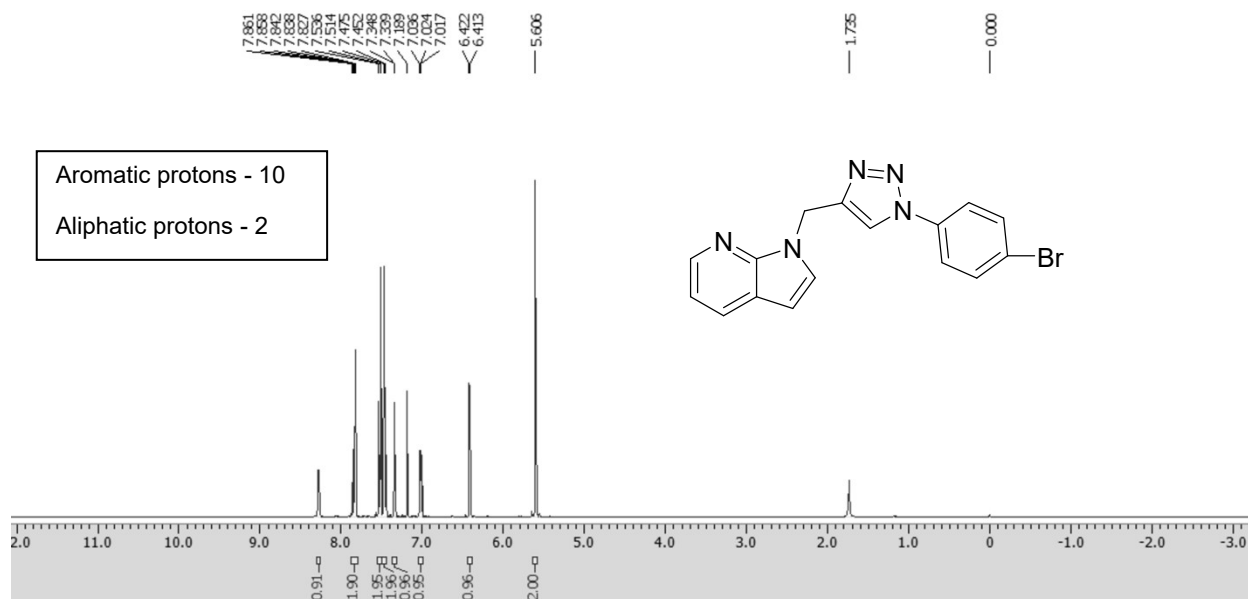Figure SI-49. <sup>1</sup>H-NMR (4o)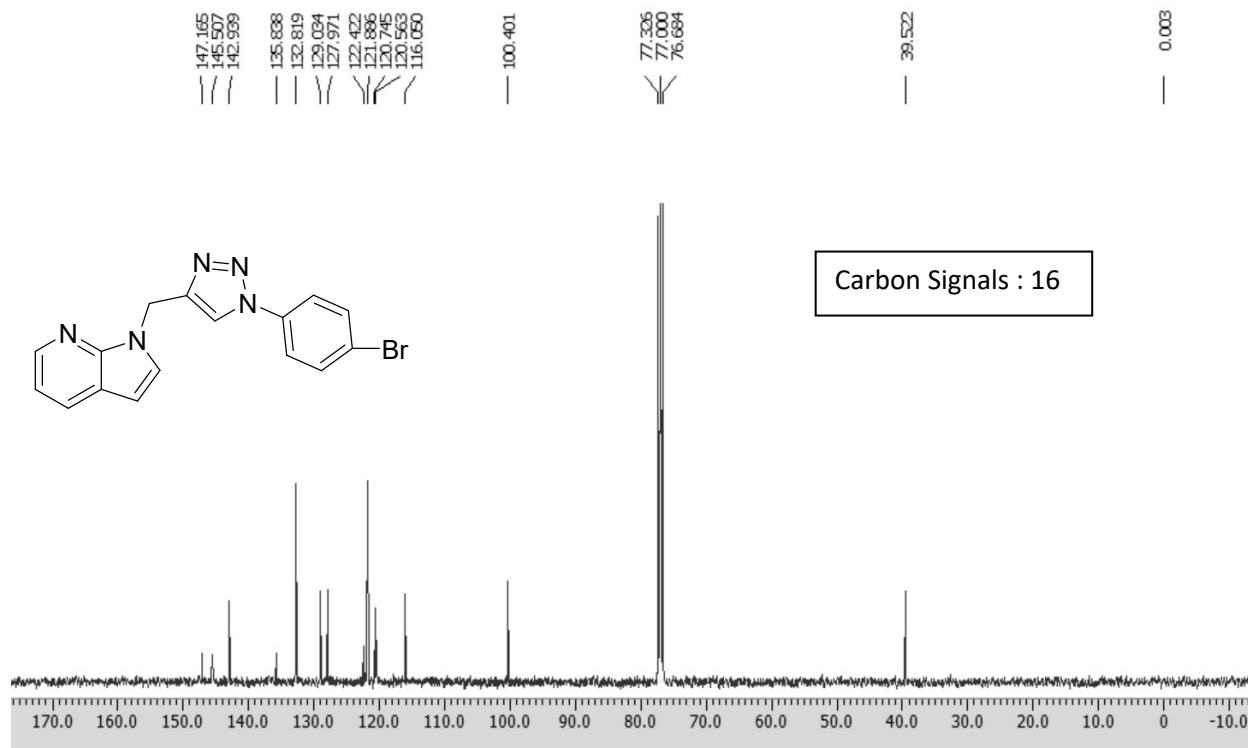Figure SI-50. <sup>13</sup>C-NMR (4o)

Sample Name : KS\_17  
Test Name :  
200722\_KS\_17 12 (0.220)

HTRPR

XEVO G2-XS QTOF

1: TOF MS ES+  
2.95e7

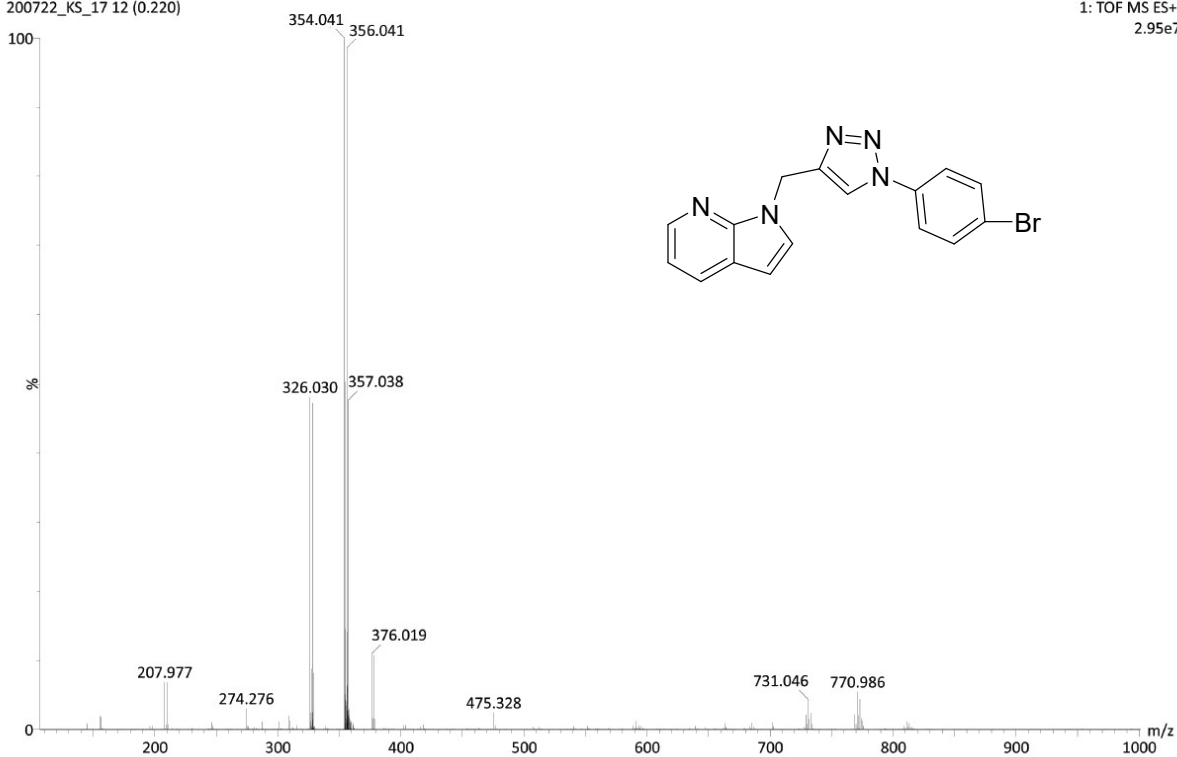

Figure SI-51. ESI-MS  $[M+H]^+$  : m/z for (4o)  $C_{16}H_{12}N_3Br$  : 354.041

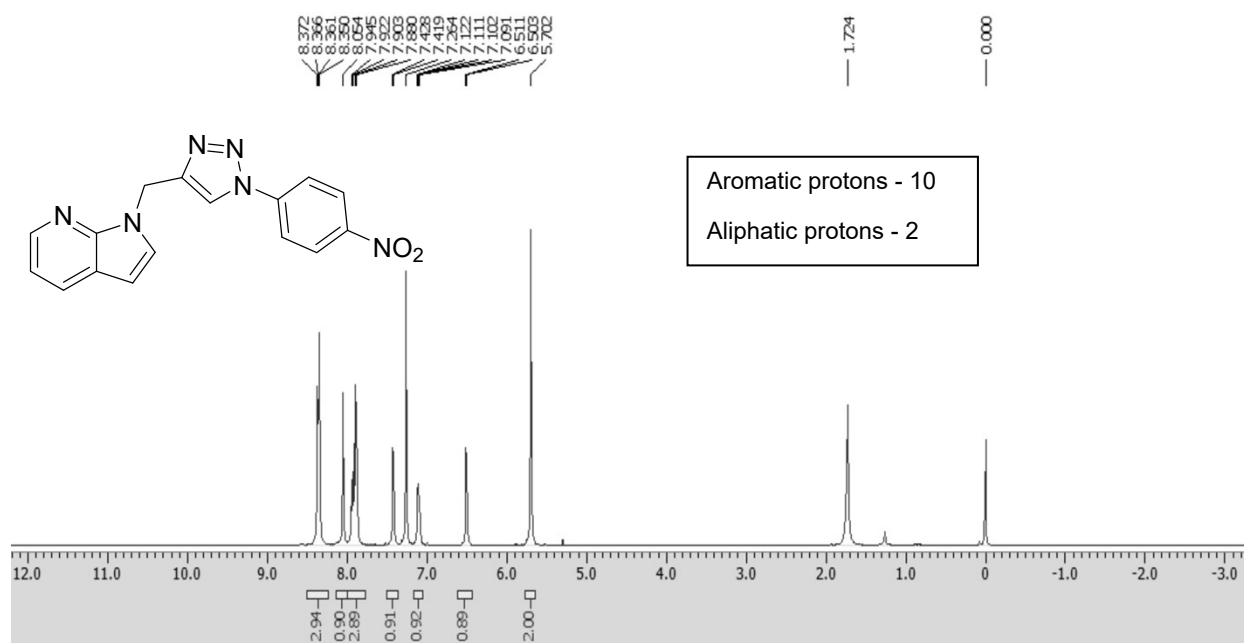Figure SI-52. <sup>1</sup>H-NMR (4p)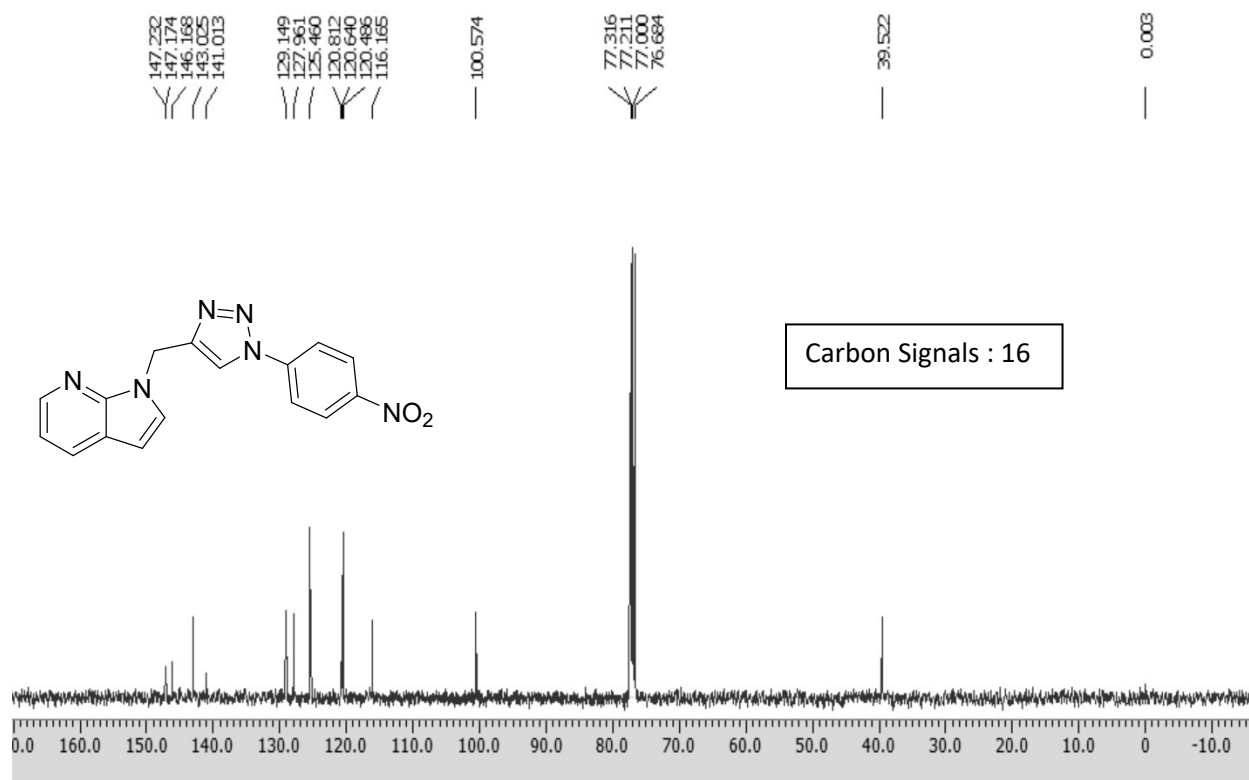Figure SI-53. <sup>13</sup>C-NMR (4p)



Sample Name : KS\_11  
Test Name :  
010622\_KS\_11 17 (0.304)

IITRPR

XEVO G2-XS QTOF

1: TOF MS ES+  
1.14e8

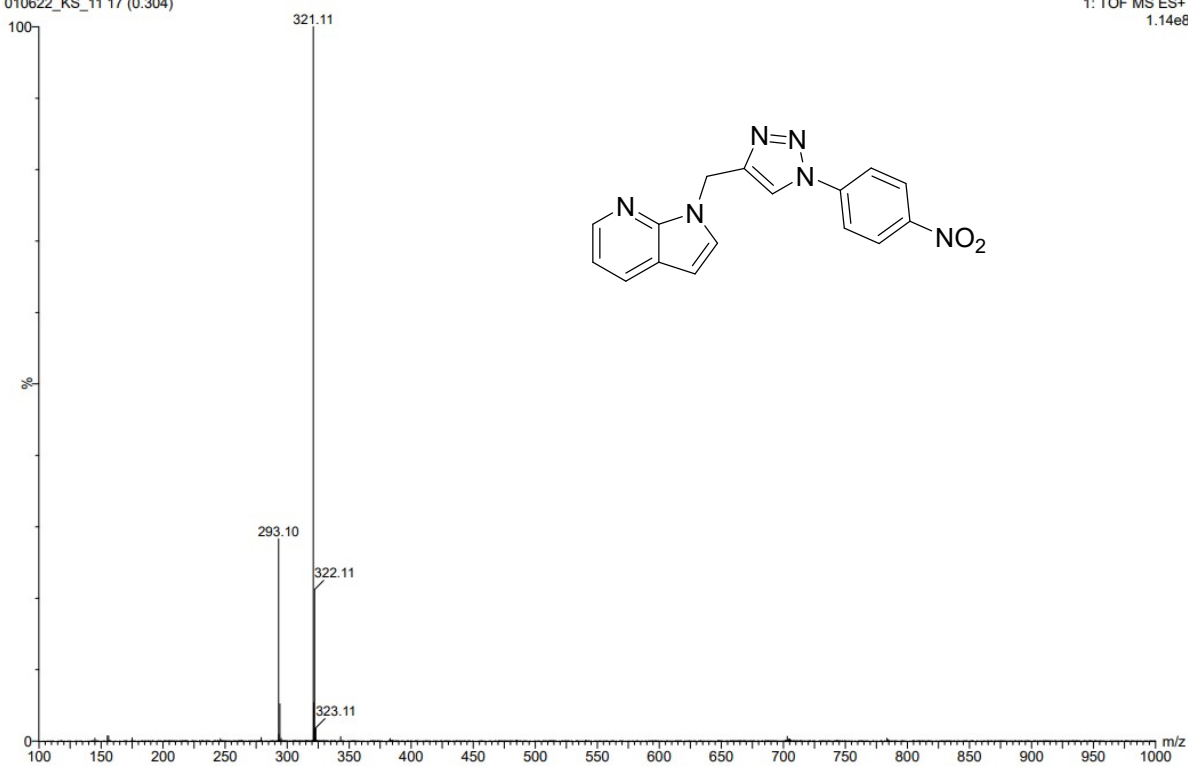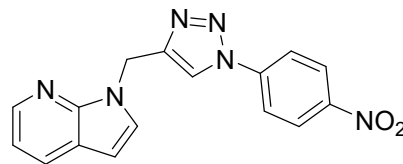

**Figure SI-54.** ESI-MS  $[M+H]^+$  : m/z for (**4p**)  $C_{16}H_{12}N_6O_2$  : 321.11

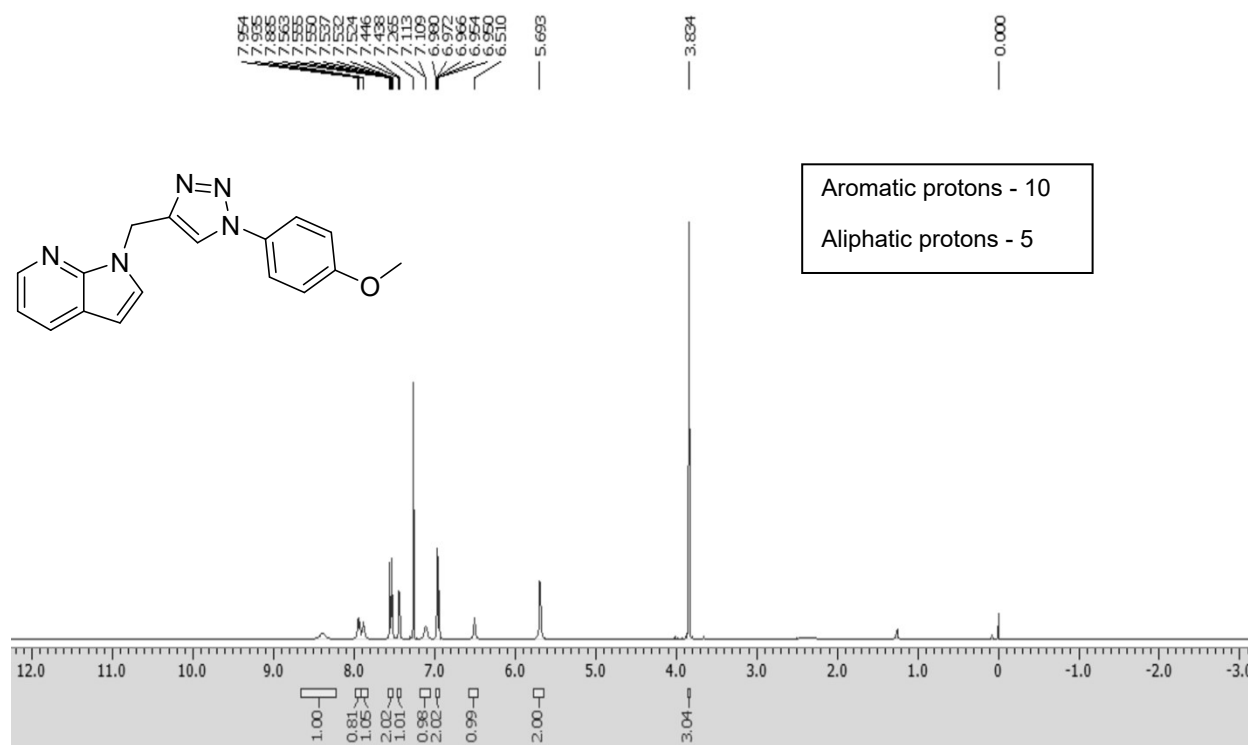Figure SI-55. <sup>1</sup>H-NMR (4q)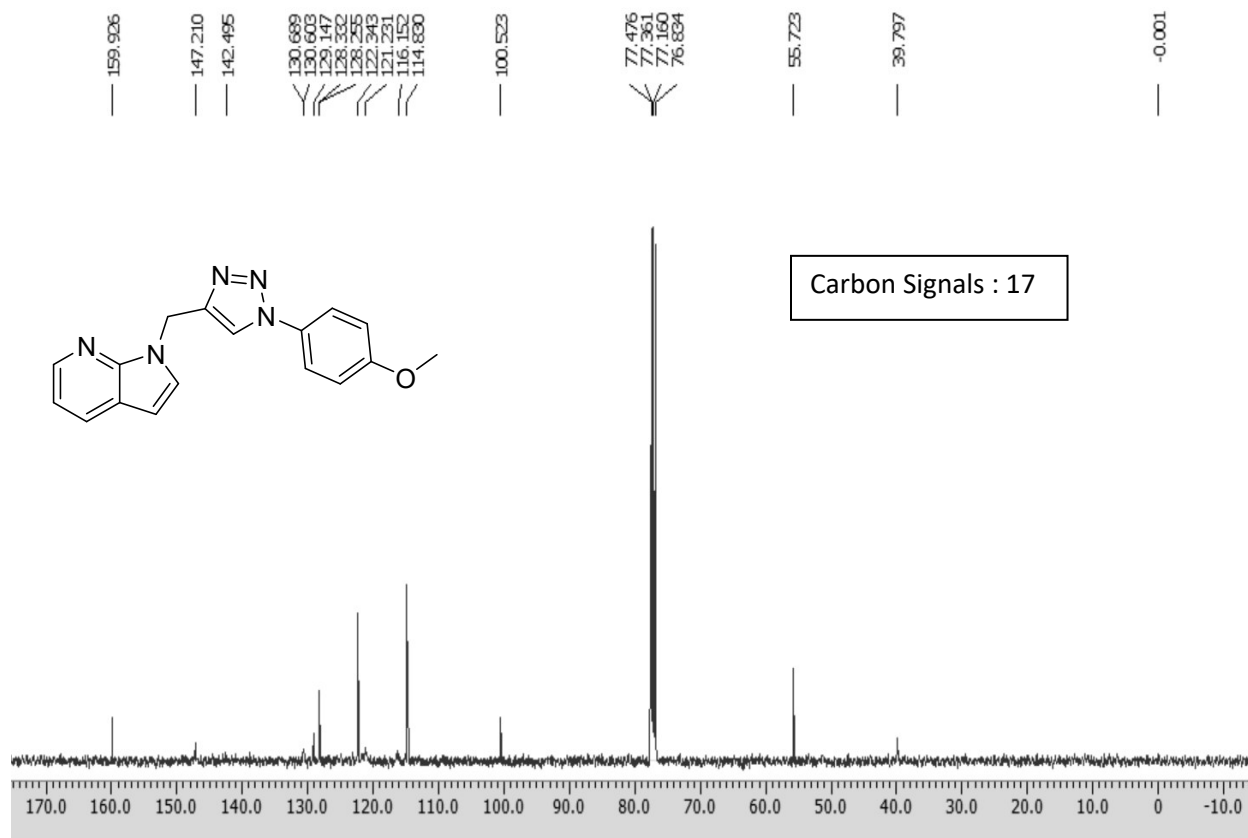Figure SI-56. <sup>13</sup>C-NMR (4q)

Sample Name : KS\_13  
Test Name :  
010622\_KS\_13 23 (0.406)

IITRPR

XEVO G2-XS QTOF

1: TOF MS ES+  
1.24e8

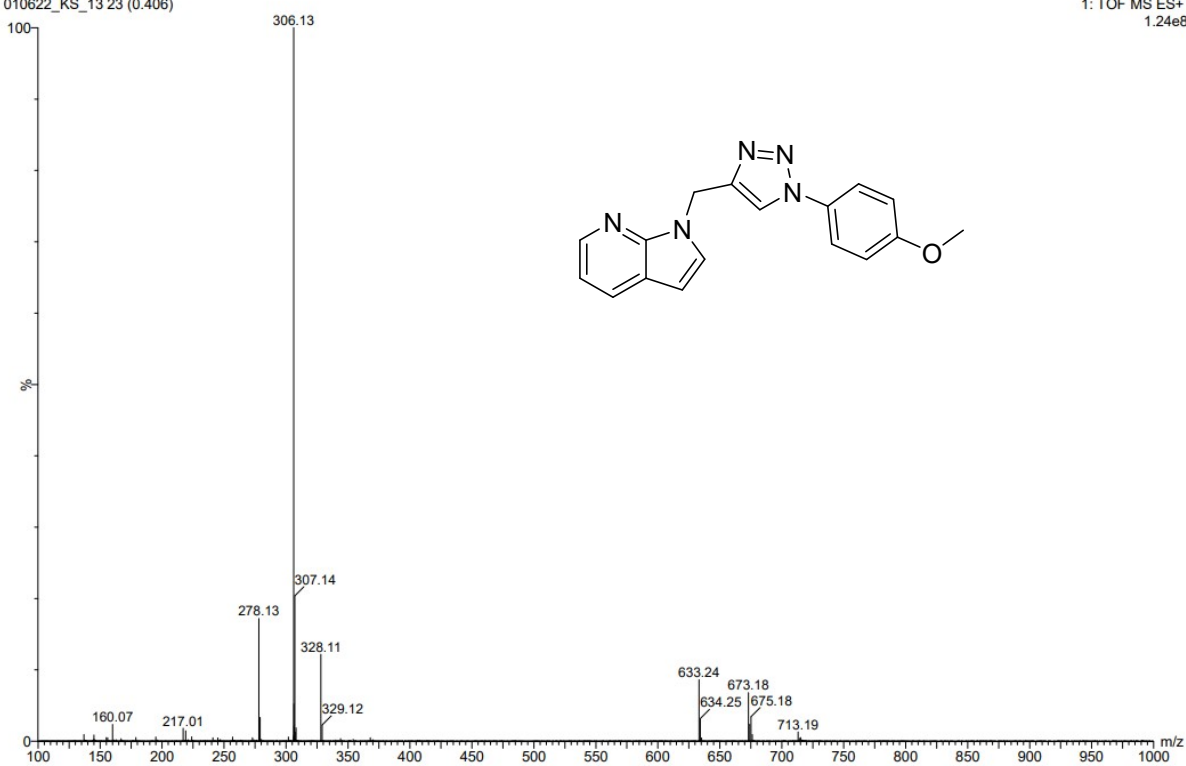

Figure SI-57. ESI-MS  $[M+H]^+$  : m/z for (4q)  $C_{17}H_{15}N_5O$  : 306.13
